# Supplementary material for: Enhanced oxygen reduction activity of size-selected platinum subnanocluster catalysts: Ptn (n = 3–9)
Source: Royal Society of Chemistry journal article supplement (doi:10.1039/d1cy00573a), 2022-01-01
Supplement: d1cy00573a1.pdf [file d1cy00573a1.pdf]

Supplementary Information for

## Enhanced Oxygen Reduction Activity of Size-Selected Platinum Subnanocluster Catalysts: Pt<sub>n</sub> (n = 3 – 9)

Akira Ohnuma,<sup>a</sup> Koki Takahashi,<sup>b</sup> Hironori Tsunoyama,<sup>b</sup> Tomoya Inoue,<sup>b</sup> Pei Zhao,<sup>c</sup> Archana Velloth,<sup>c</sup> Masahiro Ehara,<sup>c</sup> Nobuyuki Ichikuni,<sup>d</sup> Masao Tabuchi,<sup>e</sup> and Atsushi Nakajima<sup>\*b</sup>

- a. *New Field Pioneering Division, Toyota Boshoku Corporation, 1-1 Toyoda-cho, Kariya, Aichi 448-8651, Japan.*
- b. *Department of Chemistry, Faculty of Science and Technology, Keio University, 3-14-1 Hiyoshi, Kohoku-ku, Yokohama, Kanagawa 223-8522, Japan.*  
E-mail: nakajima@chem.keio.ac.jp
- c. *Department of Theoretical and Computational Molecular Science, Institute for Molecular Science, Myodaiji, Okazaki 444-8585, Japan.*
- d. *Department of Applied Chemistry and Biotechnology, Graduate School of Engineering, Chiba University, 1-33 Yayoi-cho, Inage-ku, Chiba 263-8522, Japan.*
- e. *Synchrotron Radiation Research Center, Nagoya University, Furo-cho, Chikusa, Nagoya 464-8603, Japan.*

\*Address correspondence to A. Nakajima

Tel: +81-45-566-1712, Fax: +81-45-566-1697, E-mail: nakajima@chem.keio.ac.jp

### Contents

|                                                                                                                                        |        |
|----------------------------------------------------------------------------------------------------------------------------------------|--------|
| <b>Figure S1.</b> Mass spectra for anionic Pt <sub>n</sub> nanoclusters (NCs) (n = 1 – 15).                                            | S2     |
| <b>Figure S2.</b> Hydrodynamic voltammograms under oxygen for Pt atom and Pt <sub>n</sub> (n = 3 – 9).                                 | S2     |
| <b>Figure S3.</b> Evolutions of white lines for Pt L <sub>3</sub> edge of Pt <sub>n</sub> at n = 4, 5, 6, and 8                        | S3     |
| <b>Figure S4.</b> X-ray photoelectron spectra for Pt 4f of Pt <sub>5</sub> and Pt <sub>6</sub> NCs against O <sub>2</sub> exposures.   | S3     |
| <b>Figure S5.</b> Time evolution of the XAFS oscillations in χ(k) for Pt <sub>5</sub> NCs.                                             | S4     |
| <b>Note S1.</b> Computational model.                                                                                                   | S4     |
| <b>Figure S6.</b> Optimized structure of Pt <sub>4</sub> /Gr by DFT calculations.                                                      | S5     |
| <b>Table S1.</b> Relative energies, Pt-C, and Pt-Pt distances for isomers of Pt <sub>4</sub> , Pt <sub>5</sub> , and Pt <sub>8</sub> . | S6     |
| <b>Figure S7.</b> FEFF simulations for Pt <sub>4</sub> /Gr isomers.                                                                    | S7     |
| <b>Figure S8.</b> Two isomers of Pt <sub>6</sub> /Gr and FEFF simulation.                                                              | S8     |
| <b>Figure S9.</b> Optimized structure of Pt <sub>5</sub> /Gr by DFT calculations.                                                      | S8     |
| <b>Figure S10.</b> FEFF simulations for Pt <sub>6</sub> /Gr isomers.                                                                   | S9     |
| <b>Figure S11.</b> Optimized structure of Pt <sub>8</sub> /Gr by DFT calculations.                                                     | S10    |
| <b>Figure S12.</b> FEFF simulations for Pt <sub>8</sub> /Gr isomers.                                                                   | S11    |
| <b>Figure S13.</b> Radial distributions for Pt-Pt bonds of Pt <sub>4</sub> , Pt <sub>5</sub> , and Pt <sub>8</sub> by EXAFS spectra.   | S11    |
| <b>Figure S14.</b> ORR free energy diagrams for sequential reactions of Pt <sub>4</sub> -4/Gr.                                         | S12    |
| <b>Figure S15.</b> ORR free energy diagrams for sequential reactions of Pt <sub>5</sub> -5/Gr and Pt <sub>5</sub> -8/Gr.               | S12    |
| <b>Figure S16.</b> Calculated partial density of states of Pt <sub>n</sub> /Gr (n = 4, 5, 6, and 8).                                   | S13    |
| <b>Table S2.</b> Bader charge and d-band center of Pt atoms in Pt <sub>n</sub> /Gr at n = 4, 5, 6, and 8.                              | S14    |
| <b>Figure S17.</b> Frontier molecular orbitals for Pt <sub>4</sub> -4/Gr isomer at the Γ point.                                        | S15    |
| <b>Table S3.</b> Energies for d-band center and d-band top of Pt <sub>n</sub> NCs.                                                     | S15    |
| <b>Table S4.</b> Cartesian coordinates of 7 isomers of Pt <sub>4</sub> .                                                               | S16-20 |
| <b>Table S5.</b> Cartesian coordinates of 9 isomers of Pt <sub>5</sub> .                                                               | S20-26 |
| <b>Table S6.</b> Cartesian coordinates of 7 isomers of Pt <sub>6</sub> .                                                               | S26-30 |
| <b>Table S7.</b> Cartesian coordinates of 8 isomers of Pt <sub>8</sub> .                                                               | S30-35 |
| <b>References</b>                                                                                                                      | S35    |

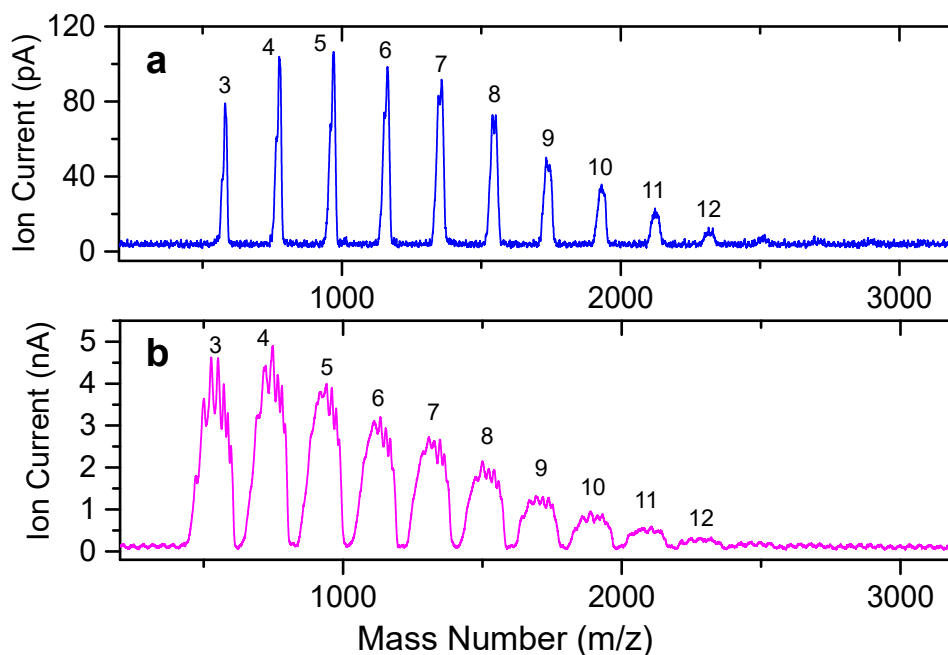

**Figure S1.** Mass spectra for anionic  $\text{Pt}_n$  NCs ( $n = 1 - 15$ ); (a) high mass resolution of  $m/\Delta m \sim 300$  for checking purity of  $\text{Pt}_n$  NCs and (b) low mass resolution of  $m/\Delta m \sim 15$  for size-selective deposition with high transmission efficiency of the Q-pole mass filter. After checking no contaminations, the mass resolution is lowered to the extent that adjacently different sizes of sub-NCs are not mixed with the targeted sub-NCs.

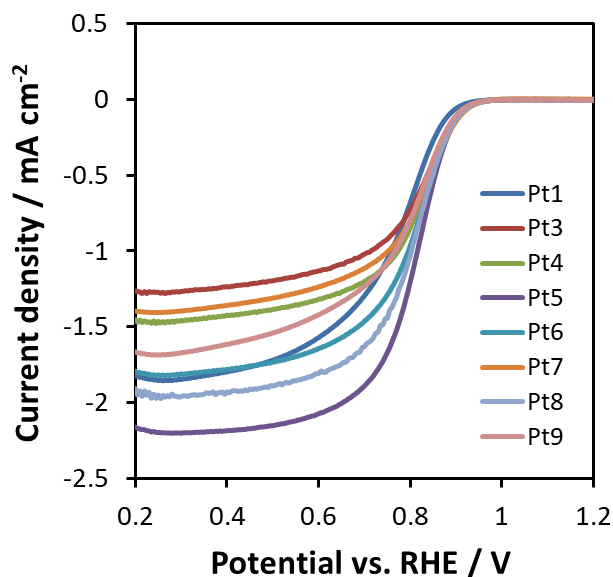

**Figure S2.** Hydrodynamic voltammograms under oxygen for Pt sub-NCs; Pt atom and  $\text{Pt}_n$  ( $n = 3 - 9$ ), wherein concentration of  $\text{HClO}_4$ , sweep rate, and rotation speed are 0.1 M,  $50 \text{ mV} \cdot \text{s}^{-1}$ , and 300 rpm, respectively.

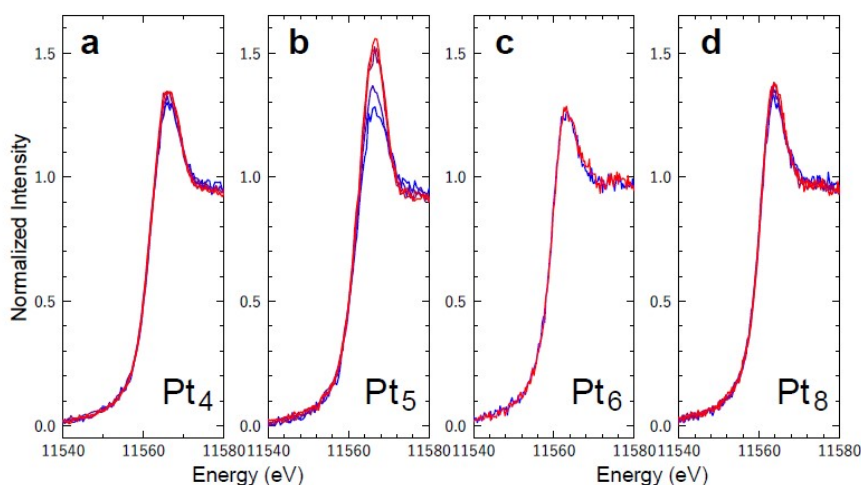

**Figure S3.** Time evolutions of white lines for Pt  $L_3$  edge of  $Pt_n$  sub-NCs at  $n = 4, 5, 6,$  and  $8$  on a glassy carbon plate with the deposition amount of 0.5 monolayer equivalent. With measurement time, the intensity increases as shown from blue trace (initial) to red trace (final), while only the intensity at  $n = 5$  increases approximately by 20-25%. Details for  $Pt_6$  has been reported elsewhere [1].

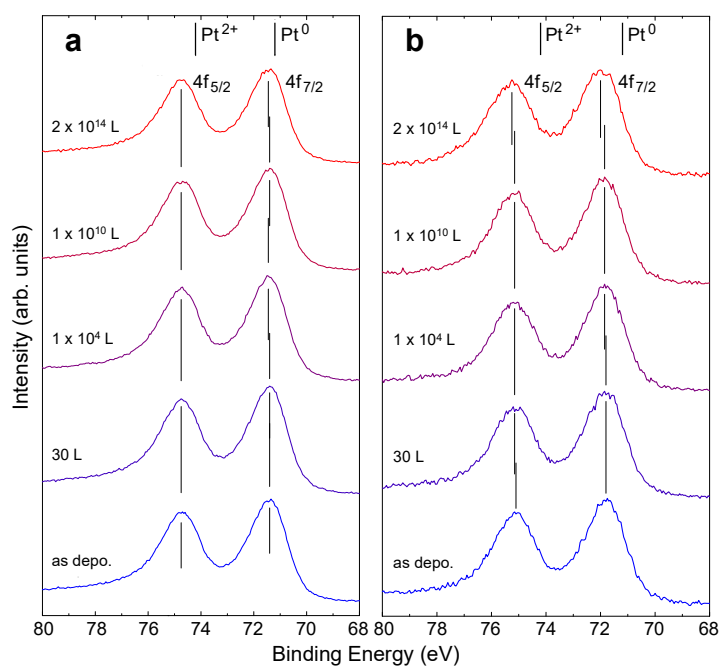

**Figure S4.** X-ray photoelectron spectra for Pt 4f of (a)  $Pt_5$  and (b)  $Pt_6$  sub-NCs deposited on a glassy carbon plate against various  $O_2$  exposures, where the spectra have been offset vertically for clarity of presentation. The NC deposition amount is 0.5 monolayer equivalent, and the exposure amount of  $O_2$  is defined by the Langmuir (L) (Langmuir =  $1 \times 10^{-6}$  Torr-s); 0 –  $2 \times 10^{14}$  L). The energy positions for  $Pt^{2+}$  and  $Pt^0$  of Pt  $4f_{7/2}$  core level [2,3] are shown at top in the figure. No apparent oxidation is observed for either  $Pt_5$  or  $Pt_6$  NCs even under  $1.0 \times 10^5$  Pa (1 atm)  $O_2$  in 3 days ( $2 \times 10^{14}$  L).

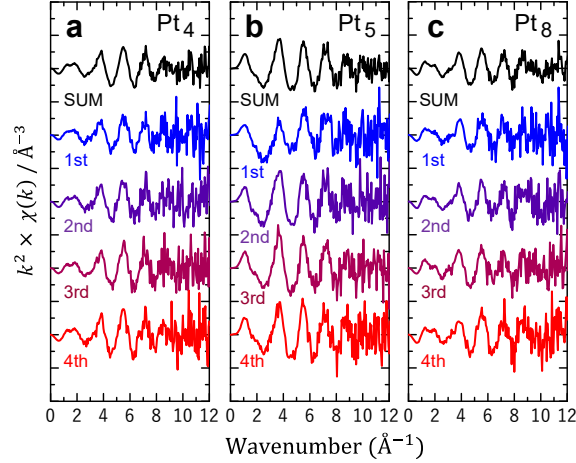

**Figure S5.** Time evolution of the EXAFS oscillations in  $\chi(k)$  spectra; every scan from 1<sup>st</sup> (blue) to 4<sup>th</sup> (red) spectra together with their summation (black; top) for (a) Pt<sub>4</sub>, (b) Pt<sub>5</sub>, and (c) Pt<sub>8</sub> NCs deposited on a glassy carbon (GC) plate [4]. Although the intensity of white line at  $n = 5$  increases approximately by 20-25 % (Fig. S3), identical oscillations appear at each scan.

**Note S1. Computational model.**

The associative mechanism of ORR in the acid medium [ $\text{O}_2(\text{g}) + 4\text{H}^+ + 4\text{e}^- \rightarrow 2\text{H}_2\text{O}$ ] was considered in the present calculations. The four elementary steps involved in ORR are given as

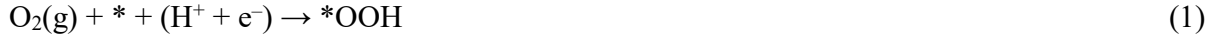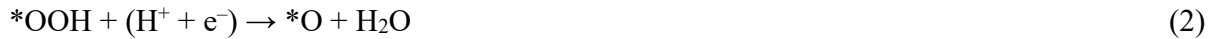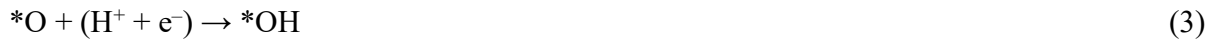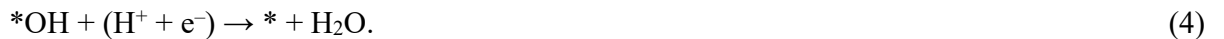

Based on the computational hydrogen electrode model introduced by Nørskov *et al.* [5], Gibbs free energy diagrams were constructed at 0 V (without any applied potential) and the ORR equilibrium potential of 1.23 V. The free energy change ( $\Delta G$ ) was determined as

$$\Delta G = \Delta E + \Delta ZPE - T\Delta S + \Delta G_U + \Delta G_{\text{pH}} \quad (5)$$

where  $\Delta E$  is the reaction energy obtained from the DFT calculations,  $\Delta ZPE$  is the change of zero-point energy,  $T$  is the temperature (298.15 K), and  $\Delta S$  is the change of entropy.  $\Delta G_U$  and  $\Delta G_{\text{pH}}$  are the contributions to the free energy due to the changes of the electrode potential ( $U$ ) and the pH value, respectively.  $\Delta G_U = -neU$ , in which  $n$  is the number of transferred electrons and  $U$  is the applied

potential.  $\Delta G_{\text{pH}} = k_{\text{B}}T \times \ln 10 \times \text{pH}$ , where  $k_{\text{B}}$  is the Boltzmann constant and the pH is 0 in the acid medium. The zero-point energies and entropies of the intermediates were obtained by calculating the vibrational frequencies. The overpotential is defined by  $\eta = U_0 - U_{\text{L}}$ , where  $U_0$  is the equilibrium potential, and  $U_{\text{L}}$  is the limiting potential defined as the maximum free energy change ( $\Delta G_{\text{max}}$ ) among all elementary steps using the relation  $U_{\text{L}} = -\Delta G_{\text{max}}/e$ .

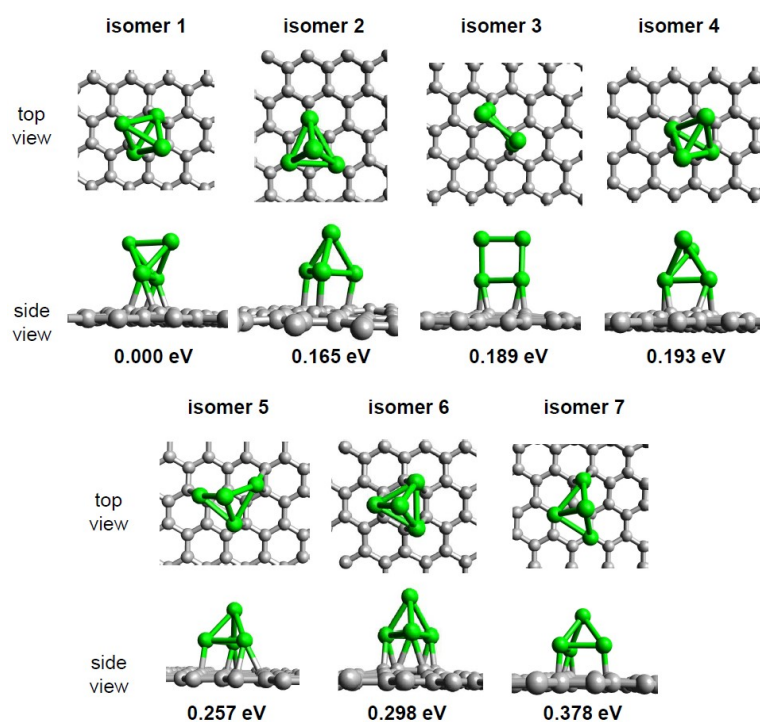

**Figure S6.** The lowest and higher energy isomers of Pt<sub>4</sub> supported on graphene (Pt<sub>4</sub>/Gr). Relative energies in eV are also indicated relative to the most stable isomer **1** (Pt<sub>4</sub>-1). The edge-standing tetrahedral structures given by isomer **4** (Pt<sub>4</sub>-4) including isomer **1** represent the most probable structures examined by FEFF simulations of  $\chi(k)$  spectra obtained by EXAFS shown in Fig. S7.

**Table S1. Relative energies, average Pt-C, and Pt-Pt distances for isomers of Pt<sub>4</sub>, Pt<sub>5</sub>, Pt<sub>6</sub>, and Pt<sub>8</sub> with PBE-D3.**

| <b>Pt<sub>4</sub>/Gr</b>              | Relative energy (eV) | d <sub>Pt-C</sub> (Å) | d <sub>Pt-Pt</sub> (Å) |
|---------------------------------------|----------------------|-----------------------|------------------------|
| <b>Pt<sub>4</sub> (1)</b>             | <b>0.000</b>         | <b>2.222</b>          | <b>2.588</b>           |
| Pt <sub>4</sub> (2)                   | 0.165                | 2.204                 | 2.618                  |
| Pt <sub>4</sub> (3)                   | 0.189                | 2.215                 | 2.479                  |
| Pt <sub>4</sub> (4)                   | 0.193                | 2.224                 | 2.594                  |
| Pt <sub>4</sub> (5)                   | 0.257                | 2.301                 | 2.580                  |
| Pt <sub>4</sub> (6)                   | 0.298                | 2.263                 | 2.640                  |
| Pt <sub>4</sub> (7)                   | 0.378                | 2.250                 | 2.579                  |
| <b>Pt<sub>5</sub>/Gr</b>              | Relative energy (eV) | d <sub>Pt-C</sub> (Å) | d <sub>Pt-Pt</sub> (Å) |
| <b>Pt<sub>5</sub> (1)</b>             | <b>0.000</b>         | <b>2.193</b>          | <b>2.475</b>           |
| Pt <sub>5</sub> (2)                   | 0.026                | 2.203                 | 2.489                  |
| Pt <sub>5</sub> (3)                   | 0.121                | 2.207                 | 2.504                  |
| Pt <sub>5</sub> (4)                   | 0.230                | 2.229                 | 2.550                  |
| Pt <sub>5</sub> (5)                   | 0.233                | 2.288                 | 2.492                  |
| Pt <sub>5</sub> (6)                   | 0.927                | 2.276                 | 2.645                  |
| Pt <sub>5</sub> (7)                   | 1.066                | 2.250                 | 2.513                  |
| Pt <sub>5</sub> (8)                   | 1.096                | 2.205                 | 2.561                  |
| Pt <sub>5</sub> (9)                   | 1.275                | 2.207                 | 2.479                  |
| <b>Pt<sub>6</sub>/Gr<sup>a)</sup></b> | Relative energy (eV) | d <sub>Pt-C</sub> (Å) | d <sub>Pt-Pt</sub> (Å) |
| <b>Pt<sub>6</sub> (1)</b>             | 0.017                | 2.220                 | 2.498                  |
| Pt <sub>6</sub> (3)                   | 0.041                | 2.224                 | 2.499                  |
| <b>Pt<sub>6</sub>(4)</b>              | <b>0.000</b>         | <b>2.251</b>          | <b>2.649</b>           |
| Pt <sub>6</sub> (5)                   | 0.104                | 2.299                 | 2.553                  |
| Pt <sub>6</sub> (6)                   | 0.657                | 2.259                 | 2.545                  |
| Pt <sub>6</sub> (7)                   | 0.418                | 3.261                 | 2.552                  |
| Pt <sub>6</sub> (8) <sup>a)</sup>     | 0.411                | 2.220                 | 2.547                  |
| <b>Pt<sub>8</sub>/Gr</b>              | Relative energy (eV) | d <sub>Pt-C</sub> (Å) | d <sub>Pt-Pt</sub> (Å) |
| <b>Pt<sub>8</sub>(1)</b>              | <b>0.000</b>         | <b>2.261</b>          | <b>2.622</b>           |
| Pt <sub>8</sub> (2)                   | 0.147                | 2.258                 | 2.603                  |
| Pt <sub>8</sub> (3)                   | 0.242                | 2.267                 | 2.652                  |
| Pt <sub>8</sub> (4)                   | 0.519                | 2.224                 | 2.669                  |
| Pt <sub>8</sub> (5)                   | 0.520                | 2.223                 | 2.692                  |
| Pt <sub>8</sub> (6)                   | 0.644                | 2.233                 | 2.628                  |
| Pt <sub>8</sub> (7)                   | 1.112                | 2.275                 | 2.576                  |
| Pt <sub>8</sub> (8)                   | 1.152                | 2.279                 | 2.596                  |

a) With PBE-D3, **Pt<sub>6</sub>-4** is the most stable isomer which was identified as the most probable structure [1] and also a new isomer 8 (**Pt<sub>6</sub>-8**) is obtained, which is 0.411 eV above **Pt<sub>6</sub>-4** (see also Figure S8).

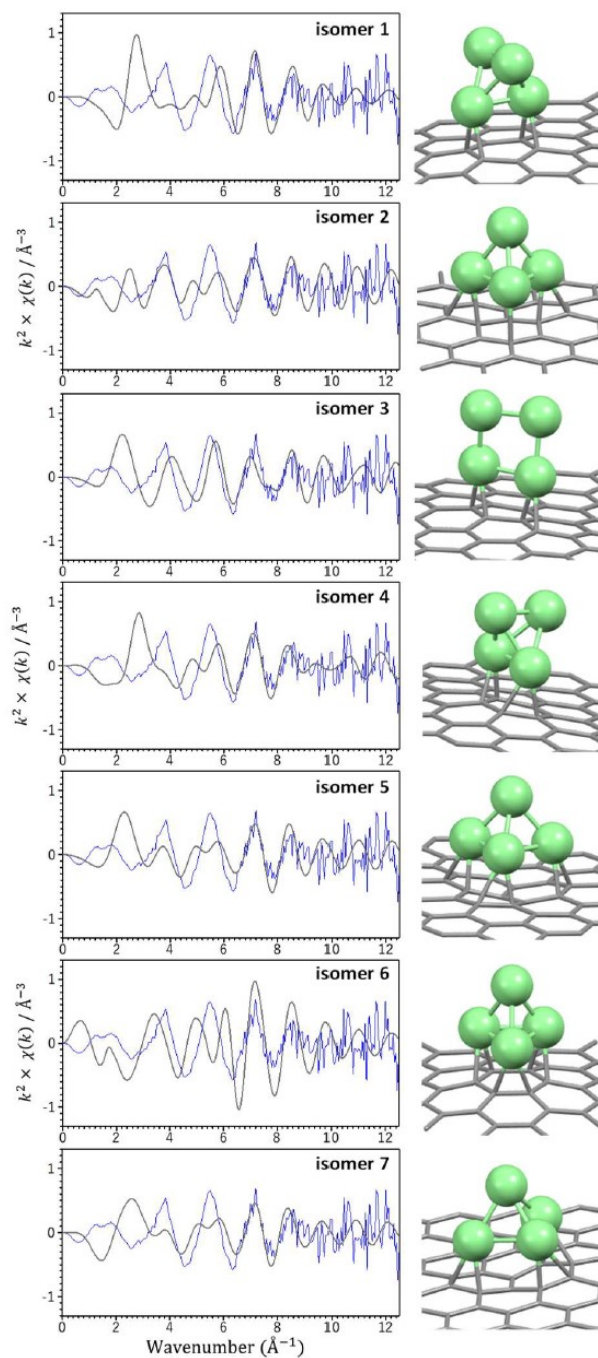

**Figure S7.** FEFF simulations of  $\chi(k)$  spectra for all isomers of Pt<sub>4</sub>/Gr shown in Fig. S6 including Figure 3 of the main text. Blue and black curves represent experimental and simulated  $\chi(k)$  spectra, respectively. Pt<sub>4</sub>/Gr coordinates were used without scaling of the geometry. The most probable structure for Pt<sub>4</sub>/GC seems to be an edge-standing tetrahedron isomer, which is given in isomer 4 (Pt<sub>4</sub>-4) (Figs. 3b), although the isomer 1 (Pt<sub>4</sub>-1) similarly has a tetrahedral structure.



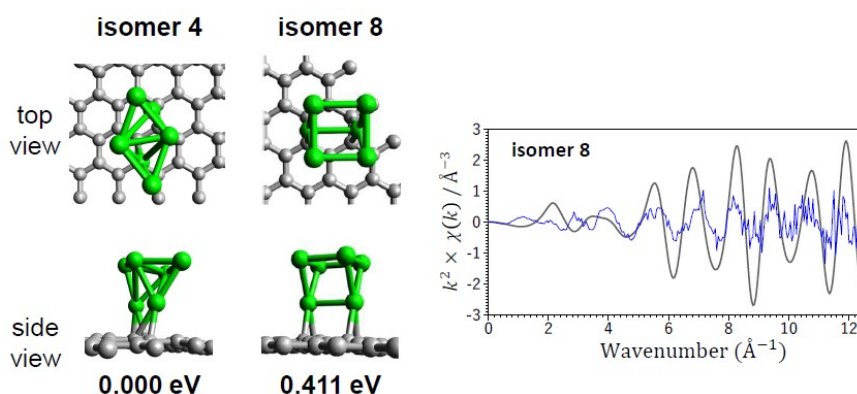

**Figure S8.** Two isomers among several  $\text{Pt}_6$  supported on graphene ( $\text{Pt}_6/\text{Gr}$ ) [1] and FEFF simulation of  $\chi(k)$  spectrum for a new isomer **8** ( $\text{Pt}_6\text{-8}$ ). The numbers below correspond to the relative energy to the most stable isomer **4** ( $\text{Pt}_6\text{-4}$ ) in eV. The  $\text{Pt}_6\text{-4}$  represents the most probable structure examined by FEFF simulations of  $\chi(k)$  spectra obtained by EXAFS reported previously [1]. With PBE-D3, the isomer **8** ( $\text{Pt}_6\text{-8}$ ), edge-standing triangle prism, is obtained, although the matching between  $\chi_{\text{obs}}(k)$  and  $\chi_{\text{sim}}(k)$  spectra is not good.

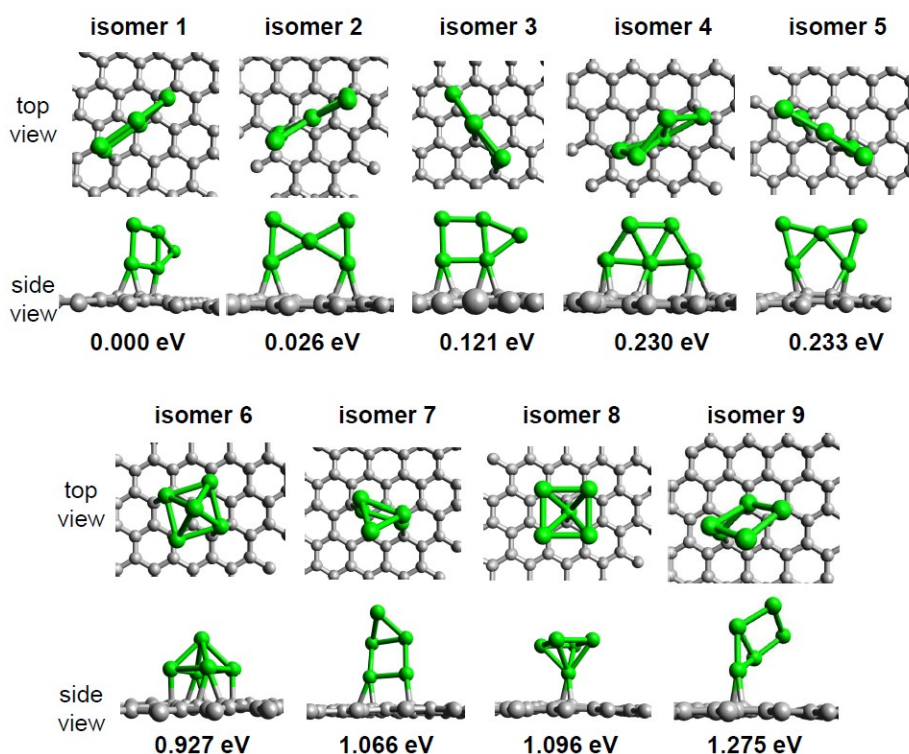

**Figure S9.** The lowest and higher energy isomers of  $\text{Pt}_5$  supported on graphene ( $\text{Pt}_5/\text{Gr}$ ). The number below correspond to the relative total energy of the clusters. Relative energies in eV are also indicated relative to the most stable isomer **1** ( $\text{Pt}_5\text{-1}$ ). Isomer **5** ( $\text{Pt}_5\text{-5}$ ), standing atom-sharing triangles, represents the most probable structure examined by FEFF simulations of  $\chi(k)$  spectra obtained by EXAFS shown in Fig. S10.



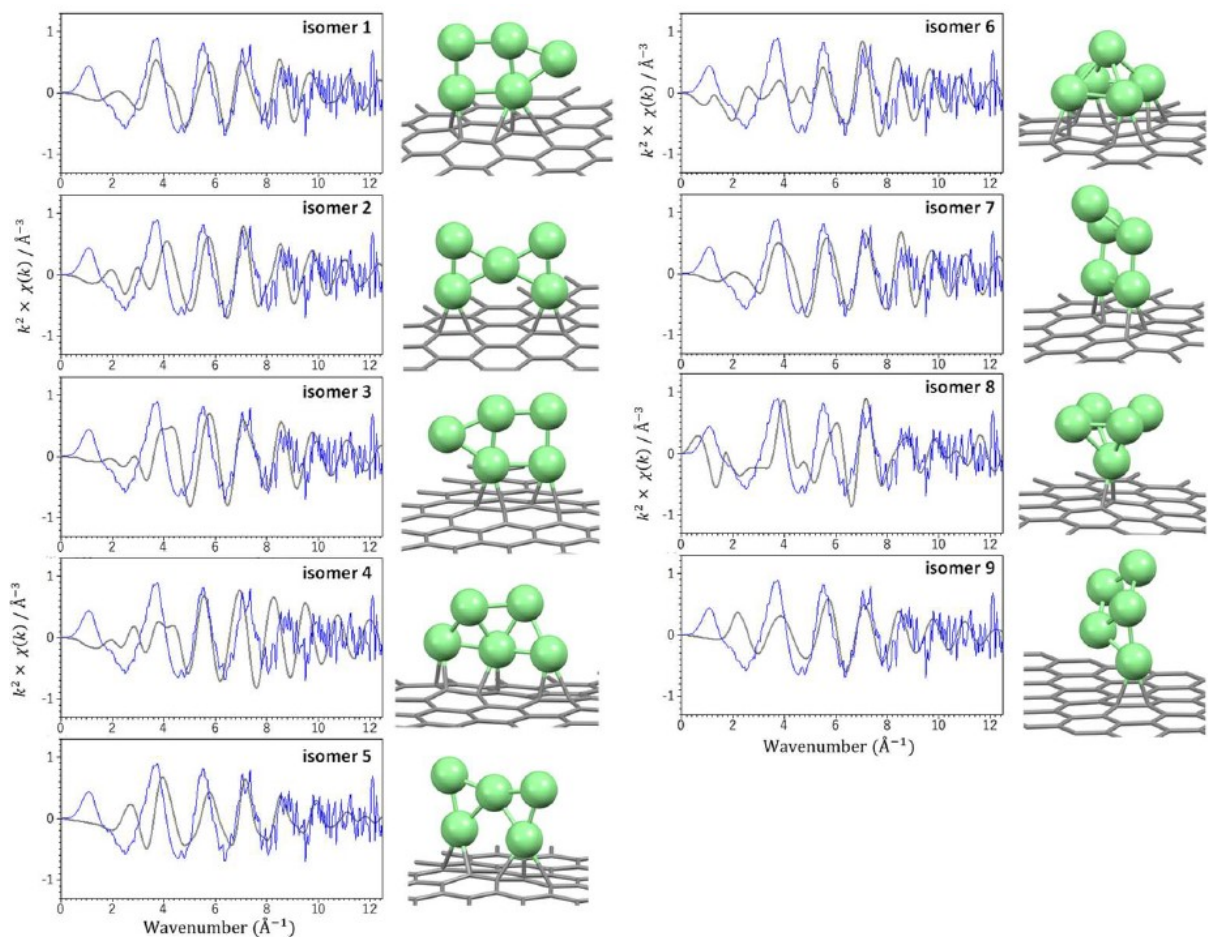

**Figure S10.** FEFF simulations of  $\chi(k)$  spectra for all isomers of  $\text{Pt}_5/\text{Gr}$  shown in Fig. S9 including Figure 4 of the main text. Blue and black curves represent experimental and simulated  $\chi(k)$  spectra, respectively.  $\text{Pt}_5/\text{Gr}$  coordinates were used without scaling of the geometry. The most probable structure for  $\text{Pt}_5/\text{GC}$  seems to be standing and atom-sharing triangles, isomer **5** ( $\text{Pt}_5\text{-5}$ ), or vertex-standing inverted pyramid, isomer **8** ( $\text{Pt}_5\text{-8}$ ), in Figs. 4b and 4d. The isomer  $\text{Pt}_5\text{-5}$  seems rather certain because  $\text{Pt}_5\text{-8}$  is by 0.86 eV less favorable than  $\text{Pt}_5\text{-5}$ .

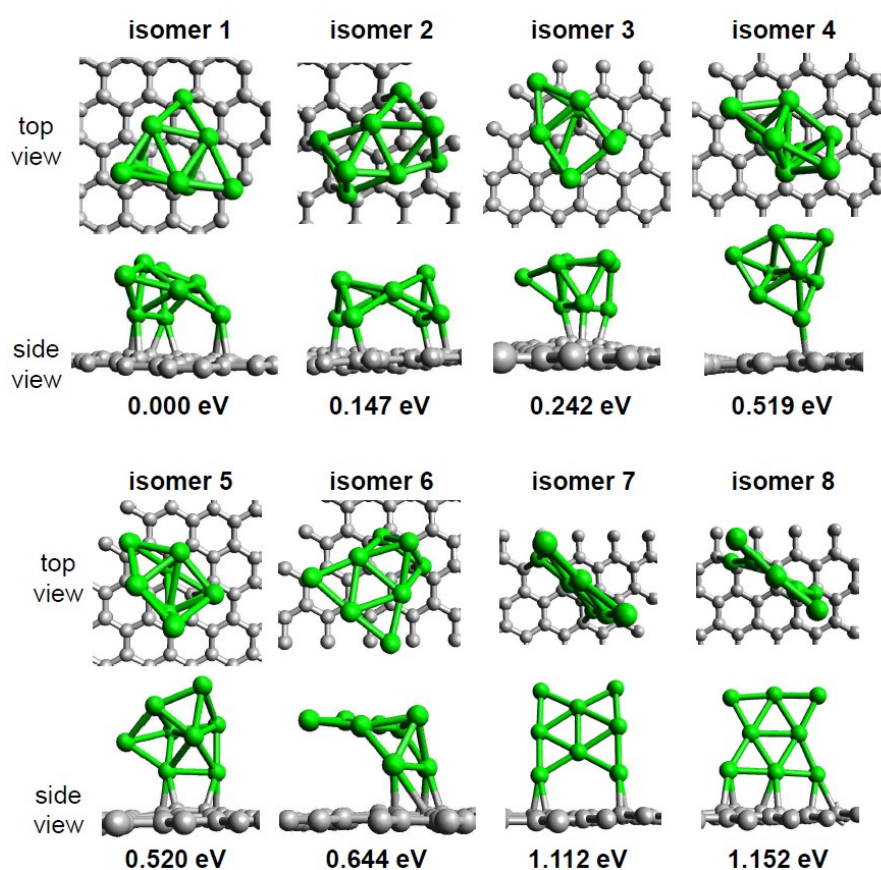

**Figure S11.** The lowest and higher energy isomers of Pt<sub>8</sub> supported on graphene (Pt<sub>8</sub>/Gr). The number below correspond to the relative total energy of the clusters. Relative energies in eV are also indicated relative to the most stable isomer **1** (Pt<sub>8</sub>-**1**). Isomer **6** (Pt<sub>8</sub>-**6**) represents the most probable structure examined by FEFF simulations of  $\chi(k)$  spectra obtained by EXAFS shown in Fig. S12.

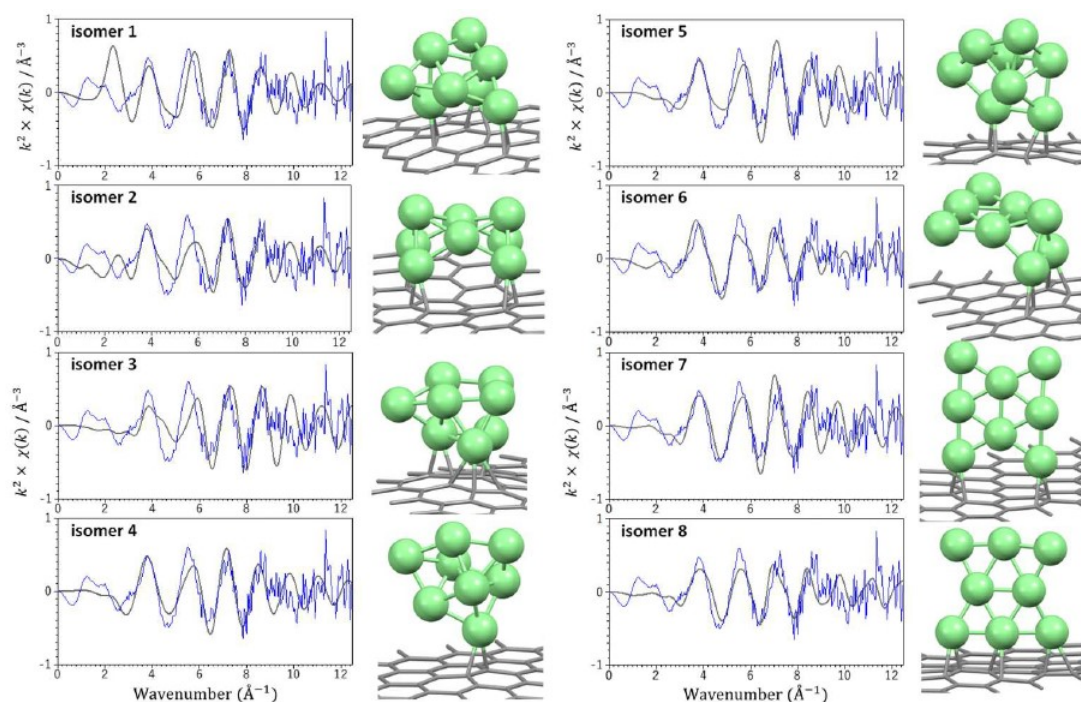

**Figure S12.** FEFF simulations of  $\chi(k)$  spectra for all isomers of  $\text{Pt}_8/\text{Gr}$  shown in Fig. S11 including Figure 5 of the main text. Blue and black curves represent experimental and simulated  $\chi(k)$  spectra, respectively.  $\text{Pt}_8/\text{Gr}$  coordinates were used without scaling of the geometry. The most probable structure for  $\text{Pt}_8/\text{GC}$  seems to be a triangular meshed hexamer fixed by two Pt atoms to Gr, which is given as eaves-like geometry of isomer 6 ( $\text{Pt}_8\text{-6}$ ).

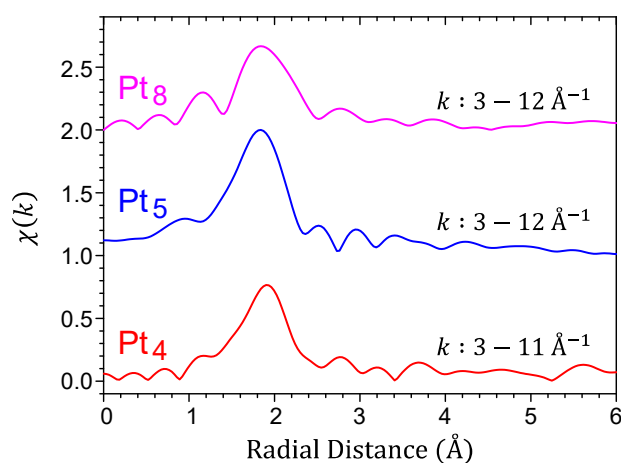

**Figure S13.** Radial distributions analyzed by EXAFS spectra [4] that have been offset vertically for clarity of presentation;  $\text{Pt}_4/\text{GC}$ ,  $\text{Pt}_5/\text{GC}$ , and  $\text{Pt}_8/\text{GC}$ .

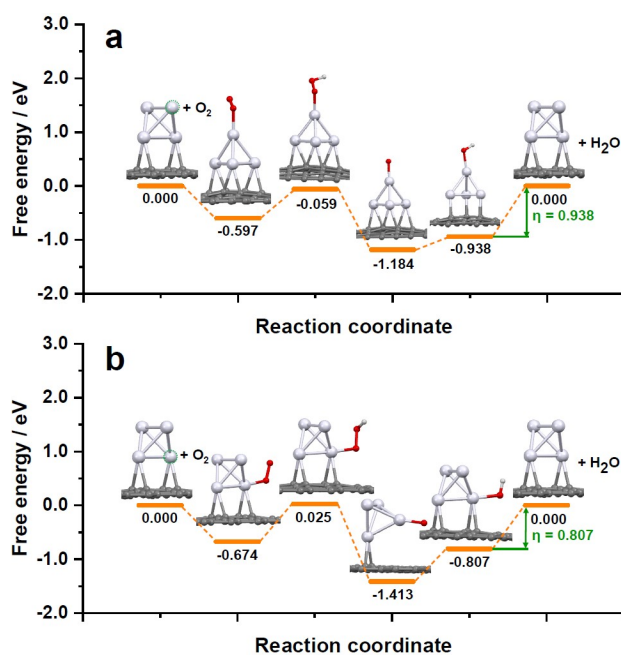

**Figure S14.** Oxygen reduction reaction (ORR) free energy diagrams in eV for sequential reactions of Pt<sub>4</sub>-4/Gr isomer between O<sub>2</sub> reactants and H<sub>2</sub>O products with applied potentials of 1.23 V: adsorbed O<sub>2</sub>, O<sub>2</sub>H, O, and OH starting from O<sub>2</sub> adsorption to (a) top Pt(3) and (b) bottom Pt(4) atoms. Overpotentials ( $\eta$ ) of (a) 0.938 V and (b) 0.807 V are obtained for the reaction of adsorbed OH into H<sub>2</sub>O products.

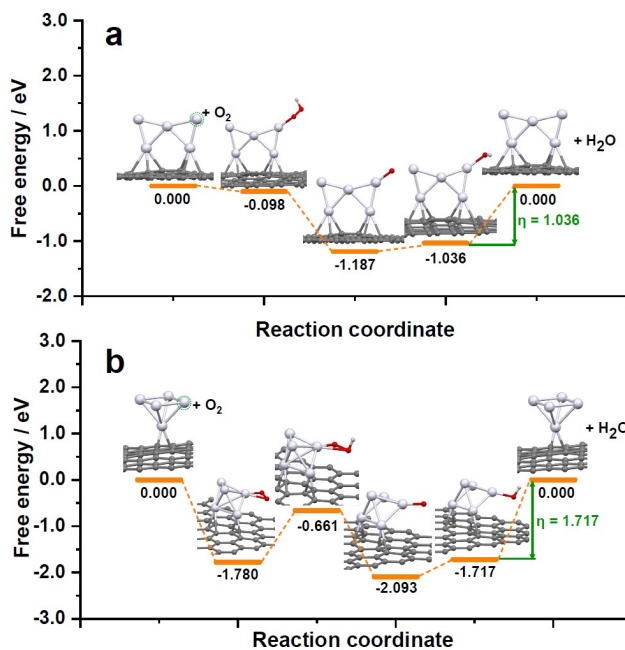

**Figure S15.** Oxygen reduction reaction (ORR) free energy diagrams in eV for sequential reactions of two isomers of (a) Pt<sub>5</sub>-5/Gr and (b) Pt<sub>5</sub>-8/Gr between O<sub>2</sub> reactants and H<sub>2</sub>O products with applied potentials of 1.23 V: adsorbed O<sub>2</sub>, O<sub>2</sub>H, O, and OH starting from O<sub>2</sub> adsorption to (a) top Pt(2) and (b) top Pt(2) atoms. Overpotentials ( $\eta$ ) of (a) 1.036 V and (b) 1.717 V are obtained for the reaction of adsorbed OH into H<sub>2</sub>O products. Note that a free O<sub>2</sub> does not adsorb to Pt atoms in Pt<sub>5</sub>-5/Gr.



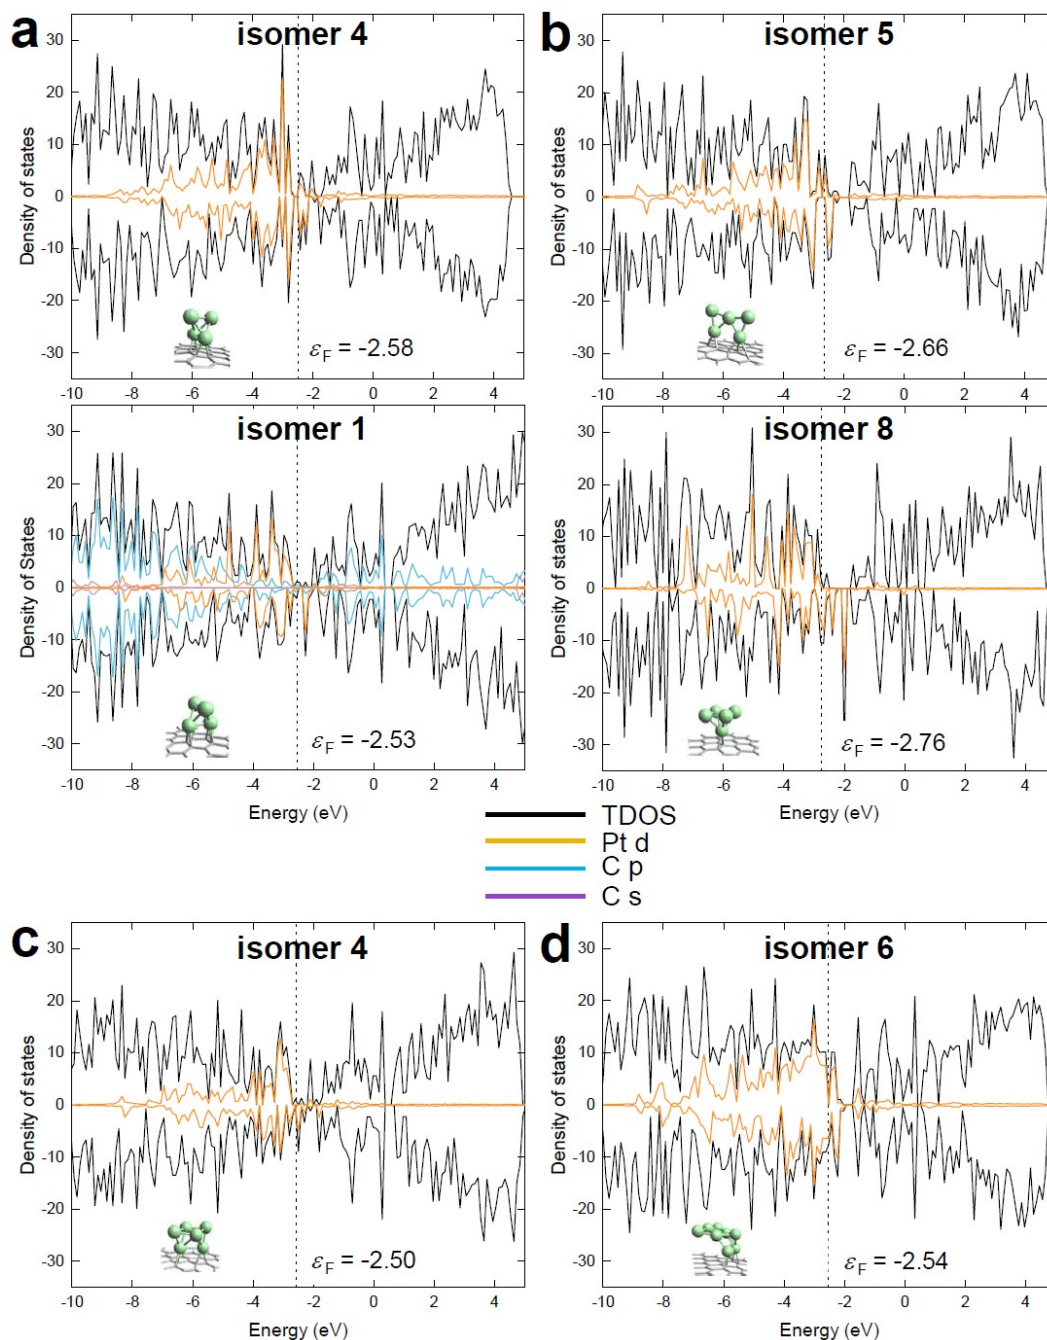

**Table S2. Bader charge and *d*-band center (eV) of Pt atoms in Pt<sub>*n*</sub>/Gr at *n* = 4, 5, 6, and 8.**

| <b>Pt<sub>4</sub>-1</b> |        |                       | <b>Pt<sub>4</sub>-4</b> |                       |
|-------------------------|--------|-----------------------|-------------------------|-----------------------|
| Pt                      | charge | <i>d</i> -band center | charge                  | <i>d</i> -band center |
| 1                       | -0.064 | -3.75                 | -0.080                  | -4.01                 |
| 2                       | 0.118  | -4.53                 | 0.140                   | -4.72                 |
| 3                       | -0.091 | -3.75                 | -0.104                  | -3.73                 |
| 4                       | 0.125  | -4.14                 | 0.109                   | -4.73                 |

| <b>Pt<sub>5</sub>-5</b> |        |                       | <b>Pt<sub>5</sub>-8</b> |                       |
|-------------------------|--------|-----------------------|-------------------------|-----------------------|
| Pt                      | charge | <i>d</i> -band center | charge                  | <i>d</i> -band center |
| 1                       | 0.102  | -4.50                 | 0.153                   | -4.59                 |
| 2                       | -0.197 | -4.05                 | -0.115                  | -4.34                 |
| 3                       | 0.108  | -4.53                 | -0.109                  | -4.38                 |
| 4                       | -0.195 | -4.06                 | -0.018                  | -4.39                 |
| 5                       | 0.116  | -4.80                 | -0.041                  | -4.33                 |

| <b>Pt<sub>6</sub>-4</b> <sup>a)</sup> |        |                       |
|---------------------------------------|--------|-----------------------|
| Pt                                    | charge | <i>d</i> -band center |
| 1                                     | 0.125  | -4.40                 |
| 2                                     | 0.086  | -4.26                 |
| 3                                     | 0.043  | -4.35                 |
| 4                                     | 0.043  | -4.42                 |
| 5                                     | -0.148 | -4.11                 |
| 6                                     | -0.151 | -4.12                 |

| <b>Pt<sub>8</sub>-6</b> |        |                       |
|-------------------------|--------|-----------------------|
| Pt                      | charge | <i>d</i> -band center |
| 1                       | 0.071  | -4.41                 |
| 2                       | 0.074  | -4.33                 |
| 3                       | 0.069  | -4.28                 |
| 4                       | 0.058  | -4.22                 |
| 5                       | 0.053  | -4.30                 |
| 6                       | -0.076 | -4.42                 |
| 7                       | -0.186 | -4.01                 |
| 8                       | -0.186 | -4.03                 |

a) Reference 1.

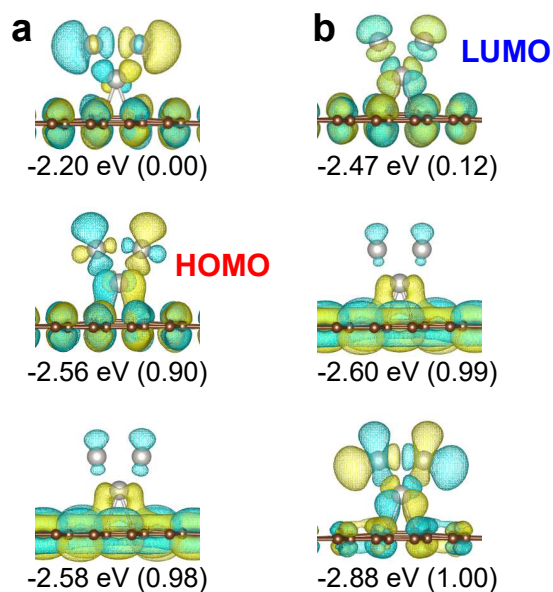

**Figure S17.** Frontier molecular orbitals for Pt<sub>4</sub>-4/Gr isomer at the  $\Gamma$  point with orbital energies in eV: (a) down- and (b) up-spin. Electron occupations for each orbital are shown in parentheses. Two top Pt atoms which are negatively charged possess relatively large amplitude in the frontier orbitals of the highest occupied molecular orbital (HOMO) and the lowest unoccupied molecular orbital (LUMO), while two bottom Pt atoms possess some amplitude in the HOMO and LUMO.

**Table S3.** Energies for *d*-band center and *d*-band top (eV) of the Pt<sub>*n*</sub> sub-NCs.

|               | Pt <sub>4</sub> -1          | Pt <sub>5</sub> -5          | Pt <sub>6</sub> -4          | Pt <sub>8</sub> -6          |
|---------------|-----------------------------|-----------------------------|-----------------------------|-----------------------------|
| d-band center | -3.75 (Pt(1)) <sup>a)</sup> | -4.05 (Pt(2)) <sup>a)</sup> | -4.11 (Pt(5)) <sup>a)</sup> | -4.01 (Pt(7)) <sup>a)</sup> |
| d-band top    | -2.77                       | -2.82                       | -2.81                       | -2.62                       |

a) See Figure 6 for the number labeled atom in each isomer.



**Table S4.** Cartesian coordinates of 7 isomers of Pt<sub>4</sub>.**Pt<sub>4</sub> Isomer 1**

|   |              |              |              |    |              |              |              |
|---|--------------|--------------|--------------|----|--------------|--------------|--------------|
| C | -6.971196651 | 12.168397903 | 17.230991364 | C  | -0.822937965 | 5.776865959  | 17.075870514 |
| C | 1.638972282  | 0.094790913  | 17.235877991 | C  | 0.389406681  | 6.476787090  | 16.957471848 |
| C | -4.510962486 | 12.169235229 | 17.245540619 | C  | 1.630735636  | 5.758845329  | 16.868583679 |
| C | 4.099505901  | 0.097174659  | 17.249689102 | C  | 2.893638134  | 6.487955570  | 16.867668152 |
| C | -2.050036430 | 12.172619820 | 17.237184525 | C  | 4.121376038  | 5.766830444  | 17.032899857 |
| C | 6.559642792  | 0.100078166  | 17.237028122 | C  | 5.339736938  | 6.485297680  | 17.110752106 |
| C | 0.410932541  | 12.174260139 | 17.198589325 | C  | 6.567892551  | 5.776008606  | 17.181261063 |
| C | 9.022157669  | 0.102375738  | 17.205677032 | C  | 7.793773174  | 6.488508224  | 17.207876205 |
| C | 2.871758938  | 12.177933693 | 17.180078506 | C  | 9.023900986  | 5.779333591  | 17.221754074 |
| C | 11.481778145 | 0.100792192  | 17.207176208 | C  | 10.250833511 | 6.490923405  | 17.206829071 |
| C | 5.329676151  | 12.171371460 | 17.205736160 | C  | -4.511748314 | 7.910310745  | 17.207885742 |
| C | 13.939455032 | 0.095612824  | 17.221420288 | C  | -3.285866737 | 8.622844696  | 17.181270599 |
| C | -0.819691181 | 1.515500426  | 17.208637238 | C  | -2.057698011 | 7.913508892  | 17.111747742 |
| C | 0.410359740  | 2.220915079  | 17.182447433 | C  | -0.839426041 | 8.632020950  | 17.033544540 |
| C | 1.639972448  | 1.513967872  | 17.207595825 | C  | 0.388267040  | 7.910796642  | 16.868875504 |
| C | 2.871142626  | 2.224604368  | 17.200328827 | C  | 1.651134491  | 8.639966011  | 16.867706299 |
| C | 4.102406025  | 1.516261697  | 17.238019943 | C  | 2.892571449  | 7.922049999  | 16.955459595 |
| C | 5.332082748  | 2.226246834  | 17.237855911 | C  | 4.105010033  | 8.621987343  | 17.073232651 |
| C | 6.562551975  | 1.519162774  | 17.249435425 | C  | 5.336273670  | 7.906237602  | 17.121036530 |
| C | 7.793054104  | 2.229602337  | 17.245342255 | C  | 6.559767723  | 8.616970062  | 17.180644989 |
| C | 9.023163795  | 1.521496534  | 17.235013962 | C  | 7.791198730  | 7.907883644  | 17.205944061 |
| C | 10.253303528 | 2.230385303  | 17.231048584 | C  | 9.018130302  | 8.619487762  | 17.220956802 |
| C | 11.482649803 | 1.520643711  | 17.221359253 | C  | -5.741800785 | 10.038994789 | 17.230514526 |
| C | 12.712412834 | 2.227415085  | 17.207080841 | C  | -4.512819290 | 10.749940872 | 17.235149384 |
| C | -2.045973539 | 3.648446083  | 17.182643890 | C  | -3.283266068 | 10.041190147 | 17.206346512 |
| C | -0.818681479 | 4.352654934  | 17.123397827 | C  | -2.052266598 | 10.752173424 | 17.199079514 |
| C | 0.410120487  | 3.639221430  | 17.112558365 | C  | -0.826491833 | 10.047405243 | 17.123596191 |
| C | 1.641497135  | 4.335039616  | 17.034126282 | C  | 0.408350945  | 10.760344505 | 17.123161316 |
| C | 2.873653889  | 3.638561964  | 17.124635696 | C  | 1.640520573  | 10.063834190 | 17.032232285 |
| C | 4.108506680  | 4.351496696  | 17.124202728 | C  | 2.871954441  | 10.759666443 | 17.109863281 |
| C | 5.334285736  | 3.646724224  | 17.199838638 | C  | 4.100774288  | 10.046176910 | 17.120622635 |
| C | 6.565318108  | 4.357635021  | 17.206932068 | C  | 5.328096867  | 10.750364304 | 17.180419922 |
| C | 7.794886589  | 3.648898840  | 17.235734940 | C  | 6.558978081  | 10.038765907 | 17.198337555 |
| C | 9.023869514  | 4.359797478  | 17.231491089 | C  | 7.786887169  | 10.747713089 | 17.227117538 |
| C | 10.255216599 | 3.651084900  | 17.228258133 | Pt | 0.538489342  | 6.564381123  | 12.866962433 |
| C | 11.483111382 | 4.360013485  | 17.200239182 | Pt | 2.273940563  | 6.100038528  | 14.769669533 |
| C | -3.277680874 | 5.781826496  | 17.182430267 | Pt | 2.723450661  | 7.827837944  | 12.856511116 |
| C | -2.054190636 | 6.492603302  | 17.123067856 | Pt | 1.002914906  | 8.298941612  | 14.770136833 |

**Pt<sub>4</sub> Isomer 2**

|   |              |              |              |   |              |             |              |
|---|--------------|--------------|--------------|---|--------------|-------------|--------------|
| C | -6.943318367 | 12.171335220 | 17.200019836 | C | 9.046647072  | 1.518908620 | 17.170713425 |
| C | 1.666719198  | 0.096439153  | 17.167242050 | C | 10.273289680 | 2.227082491 | 17.238594055 |
| C | -4.485410690 | 12.170739174 | 17.112615585 | C | 11.503802299 | 1.516163468 | 17.264266968 |
| C | 4.125020027  | 0.099039868  | 17.067720413 | C | 12.734872818 | 2.226343632 | 17.296794891 |
| C | -2.024023533 | 12.170597076 | 17.052970886 | C | -2.025264740 | 3.648150206 | 17.315572739 |
| C | 6.583944321  | 0.097113155  | 17.064073563 | C | -0.797672868 | 4.356883526 | 17.324705124 |
| C | 0.434724331  | 12.173197746 | 17.076229095 | C | 0.433751583  | 3.643975735 | 17.294666290 |
| C | 9.044363022  | 0.099655107  | 17.135559082 | C | 1.662121296  | 4.350769997 | 17.245143890 |
| C | 2.892498016  | 12.172919273 | 17.173007965 | C | 2.878736496  | 3.638024092 | 17.090343475 |
| C | 11.503625870 | 0.099335179  | 17.233829498 | C | 4.121804237  | 4.340598106 | 16.944248199 |
| C | 5.356244087  | 12.171788216 | 17.233394623 | C | 5.369256020  | 3.637509108 | 17.014984131 |
| C | 13.965541840 | 0.097374640  | 17.240249634 | C | 6.587629318  | 4.349496365 | 17.117536545 |
| C | -0.796549261 | 1.517169476  | 17.272665024 | C | 7.816123486  | 3.644700289 | 17.165401459 |
| C | 0.434387088  | 2.225790501  | 17.255338669 | C | 9.045868874  | 4.356387615 | 17.224317551 |
| C | 1.662993193  | 1.515378356  | 17.181644440 | C | 10.272994995 | 3.648117065 | 17.258344650 |
| C | 2.889182568  | 2.222538471  | 17.101932526 | C | 11.503392220 | 4.359124660 | 17.290416718 |
| C | 4.124009609  | 1.515118718  | 17.051242828 | C | -3.256407499 | 5.777480602 | 17.261627197 |
| C | 5.359120369  | 2.223113775  | 17.036159515 | C | -2.027279854 | 6.489145279 | 17.245206833 |
| C | 6.587574005  | 1.516200900  | 17.074741364 | C | -0.799359322 | 5.779652119 | 17.289836884 |
| C | 7.816369534  | 2.226559639  | 17.132087708 | C | 0.426881313  | 6.490147591 | 17.242710114 |

|   |              |             |              |
|---|--------------|-------------|--------------|
| C | 1.658625126  | 5.775122643 | 17.268507004 |
| C | 2.872566938  | 6.475944996 | 17.156169891 |
| C | 4.122301102  | 5.775306225 | 17.006904602 |
| C | 5.378355026  | 6.482808590 | 17.086502075 |
| C | 6.591485977  | 5.775163651 | 17.150203705 |
| C | 7.821064949  | 6.489492416 | 17.184360504 |
| C | 9.047103882  | 5.778867245 | 17.221504211 |
| C | 10.275035858 | 6.489241600 | 17.226938248 |
| C | -4.483069420 | 7.909660816 | 17.187841415 |
| C | -3.255284071 | 8.620943069 | 17.155998230 |
| C | -2.028236628 | 7.908321381 | 17.170578003 |
| C | -0.802597046 | 8.616830826 | 17.095275879 |
| C | 0.418038845  | 7.900095940 | 17.087329865 |
| C | 1.648221493  | 8.625980377 | 16.946161270 |
| C | 2.890921593  | 7.908867359 | 17.009902954 |
| C | 4.131336212  | 8.642935753 | 17.092203140 |
| C | 5.368331432  | 7.917311668 | 17.034900665 |
| C | 6.604016781  | 8.630497932 | 17.092035294 |

#### Pt<sub>4</sub> Isomer 3

|   |              |              |              |
|---|--------------|--------------|--------------|
| C | -6.952286720 | 12.158449173 | 17.226348877 |
| C | 1.656212687  | 0.083531052  | 17.249095917 |
| C | -4.492796421 | 12.156047821 | 17.251567841 |
| C | 4.116915226  | 0.082974993  | 17.250406265 |
| C | -2.033538818 | 12.155988693 | 17.236068726 |
| C | 6.576751232  | 0.082269594  | 17.223611832 |
| C | 0.426715374  | 12.156288147 | 17.181631088 |
| C | 9.035563469  | 0.083116472  | 17.181364059 |
| C | 2.886775970  | 12.156489372 | 17.134832382 |
| C | 11.495896339 | 0.084564790  | 17.177885056 |
| C | 5.346460819  | 12.158391953 | 17.174139023 |
| C | 13.956741333 | 0.084278792  | 17.222332001 |
| C | -0.804807544 | 1.502511024  | 17.241315842 |
| C | 0.425132990  | 2.210861206  | 17.236425400 |
| C | 1.655360222  | 1.503486633  | 17.241699219 |
| C | 2.886034489  | 2.213492393  | 17.223199844 |
| C | 4.117634296  | 1.502984881  | 17.237112045 |
| C | 5.346910954  | 2.210711241  | 17.225019455 |
| C | 6.577894688  | 1.501600862  | 17.232683182 |
| C | 7.807260513  | 2.211338997  | 17.232694626 |
| C | 9.037049294  | 1.502515435  | 17.223360062 |
| C | 10.266059875 | 2.213593245  | 17.235553741 |
| C | 11.496212006 | 1.503829598  | 17.225286484 |
| C | 12.724675179 | 2.212929487  | 17.241434097 |
| C | -2.035191774 | 3.633674860  | 17.242921829 |
| C | -0.806341171 | 4.342772484  | 17.211479187 |
| C | 0.423136234  | 3.630530119  | 17.201103210 |
| C | 1.650619507  | 4.334796906  | 17.136108398 |
| C | 2.885165691  | 3.629156351  | 17.163982391 |
| C | 4.119142056  | 4.335815907  | 17.123819351 |
| C | 5.349133492  | 3.629551411  | 17.180372238 |
| C | 6.578871250  | 4.339534760  | 17.180393219 |
| C | 7.808769703  | 3.631900311  | 17.225166321 |
| C | 9.036248207  | 4.342634201  | 17.237329483 |
| C | 10.266431808 | 3.633155346  | 17.250202179 |
| C | 11.495616913 | 4.343482971  | 17.251415253 |
| C | -3.263762474 | 5.764577866  | 17.249336243 |
| C | -2.036744118 | 6.474729061  | 17.226583481 |

#### Pt<sub>4</sub> Isomer 4

|   |              |              |              |
|---|--------------|--------------|--------------|
| C | -6.952286720 | 12.158449173 | 17.226348877 |
| C | 1.656212687  | 0.083531052  | 17.249095917 |
| C | -4.492796421 | 12.156047821 | 17.251567841 |
| C | 4.116915226  | 0.082974993  | 17.250406265 |
| C | -2.033538818 | 12.155988693 | 17.236068726 |

|    |              |              |              |
|----|--------------|--------------|--------------|
| C  | 7.825819492  | 7.909024239  | 17.148303986 |
| C  | 9.051860809  | 8.621000290  | 17.163661957 |
| C  | -5.710840225 | 10.041893959 | 17.149158478 |
| C  | -4.483461380 | 10.750502586 | 17.121919632 |
| C  | -3.254623890 | 10.038454056 | 17.106613159 |
| C  | -2.023829460 | 10.748974800 | 17.063991547 |
| C  | -0.797892094 | 10.040019035 | 17.047107697 |
| C  | 0.432734489  | 10.755873680 | 17.036779404 |
| C  | 1.662868023  | 10.057705879 | 17.018924713 |
| C  | 2.888449669  | 10.756642342 | 17.125469208 |
| C  | 4.125107765  | 10.047041893 | 17.159149170 |
| C  | 5.358668804  | 10.754693985 | 17.194229126 |
| C  | 6.590488434  | 10.049126625 | 17.154443741 |
| C  | 7.820164680  | 10.754703522 | 17.170621872 |
| Pt | 3.649557114  | 6.930109024  | 12.793650627 |
| Pt | 3.931849241  | 5.425019741  | 14.884222031 |
| Pt | 5.089504242  | 7.756814003  | 14.732416153 |
| Pt | 2.490933418  | 7.925104141  | 14.887668610 |

|    |              |              |              |
|----|--------------|--------------|--------------|
| C  | -0.806805134 | 5.763484001  | 17.187864304 |
| C  | 0.416435957  | 6.472868443  | 17.101957321 |
| C  | 1.638417959  | 5.750842094  | 17.032440186 |
| C  | 2.878758430  | 6.453771114  | 16.884729385 |
| C  | 4.127988815  | 5.746010303  | 17.003152847 |
| C  | 5.356215954  | 6.455091953  | 17.002622604 |
| C  | 6.582337379  | 5.757669449  | 17.123855591 |
| C  | 7.811107159  | 6.473011017  | 17.164928436 |
| C  | 9.036723137  | 5.764477730  | 17.223924637 |
| C  | 10.266908646 | 6.475319862  | 17.242338181 |
| C  | -4.490644932 | 7.894370079  | 17.237197876 |
| C  | -3.262300968 | 8.605459213  | 17.242126465 |
| C  | -2.034802675 | 7.894965649  | 17.223056793 |
| C  | -0.806169510 | 8.606303215  | 17.174966812 |
| C  | 0.418719769  | 7.898426533  | 17.092163086 |
| C  | 1.636131763  | 8.613352776  | 16.971139908 |
| C  | 2.859608650  | 7.896928310  | 16.772029877 |
| C  | 4.128139496  | 8.629107475  | 16.774688721 |
| C  | 5.367673874  | 7.891376495  | 16.886610031 |
| C  | 6.597002029  | 8.613759041  | 17.033433914 |
| C  | 7.817259312  | 7.894995689  | 17.137092590 |
| C  | 9.040812492  | 8.605949402  | 17.201908112 |
| C  | -5.721210003 | 10.026905060 | 17.212064743 |
| C  | -4.492712021 | 10.736649513 | 17.243396759 |
| C  | -3.262293339 | 10.026367188 | 17.242187500 |
| C  | -2.034025669 | 10.735796928 | 17.226108551 |
| C  | -0.804709911 | 10.026382446 | 17.178833008 |
| C  | 0.425114632  | 10.735565186 | 17.135532379 |
| C  | 1.650689602  | 10.027894974 | 17.035736084 |
| C  | 2.886715889  | 10.741358757 | 17.035301208 |
| C  | 4.119187355  | 10.046380997 | 16.971258163 |
| C  | 5.347030163  | 10.743583679 | 17.091970444 |
| C  | 6.582671165  | 10.033014297 | 17.102392197 |
| C  | 7.808722496  | 10.737768173 | 17.188169479 |
| Pt | 3.182937622  | 8.829756737  | 12.998270988 |
| Pt | 2.816349745  | 6.914447308  | 14.744468689 |
| Pt | 4.408218384  | 6.667492390  | 12.644161224 |
| Pt | 5.014361382  | 8.155820847  | 14.743202209 |

|   |              |              |              |
|---|--------------|--------------|--------------|
| C | 6.576751232  | 0.082269594  | 17.223611832 |
| C | 0.426715374  | 12.156288147 | 17.181631088 |
| C | 9.035563469  | 0.083116472  | 17.181364059 |
| C | 2.886775970  | 12.156489372 | 17.134832382 |
| C | 11.495896339 | 0.084564790  | 17.177885056 |

|   |              |              |              |
|---|--------------|--------------|--------------|
| C | 5.346460819  | 12.158391953 | 17.174139023 |
| C | 13.956741333 | 0.084278792  | 17.222332001 |
| C | -0.804807544 | 1.502511024  | 17.241315842 |
| C | 0.425132990  | 2.210861206  | 17.236425400 |
| C | 1.655360222  | 1.503486633  | 17.241699219 |
| C | 2.886034489  | 2.213492393  | 17.223199844 |
| C | 4.117634296  | 1.502984881  | 17.237112045 |
| C | 5.346910954  | 2.210711241  | 17.225019455 |
| C | 6.577894688  | 1.501600862  | 17.232683182 |
| C | 7.807260513  | 2.211338997  | 17.232694626 |
| C | 9.037049294  | 1.502515435  | 17.223360062 |
| C | 10.266059875 | 2.213593245  | 17.235553741 |
| C | 11.496212006 | 1.503829598  | 17.225286484 |
| C | 12.724675179 | 2.212929487  | 17.241434097 |
| C | -2.035191774 | 3.633674860  | 17.242921829 |
| C | -0.806341171 | 4.342772484  | 17.211479187 |
| C | 0.423136234  | 3.630530119  | 17.201103210 |
| C | 1.650619507  | 4.334796906  | 17.136108398 |
| C | 2.885165691  | 3.629156351  | 17.163982391 |
| C | 4.119142056  | 4.335815907  | 17.123819351 |
| C | 5.349133492  | 3.629551411  | 17.180372238 |
| C | 6.578871250  | 4.339534760  | 17.180393219 |
| C | 7.808769703  | 3.631900311  | 17.225166321 |
| C | 9.036248207  | 4.342634201  | 17.237329483 |
| C | 10.266431808 | 3.633155346  | 17.250202179 |
| C | 11.495616913 | 4.343482971  | 17.251415253 |
| C | -3.263762474 | 5.764577866  | 17.249336243 |
| C | -2.036744118 | 6.474729061  | 17.226583481 |
| C | -0.806805134 | 5.763484001  | 17.187864304 |
| C | 0.416435957  | 6.472868443  | 17.101957321 |
| C | 1.638417959  | 5.750842094  | 17.032440186 |
| C | 2.878758430  | 6.453771114  | 16.884729385 |
| C | 4.127988815  | 5.746010303  | 17.003152847 |

#### Pt<sub>4</sub> Isomer 5

|   |              |              |              |
|---|--------------|--------------|--------------|
| C | -6.948593616 | 12.229092598 | 17.179634094 |
| C | 1.661832094  | 0.153888896  | 17.146326065 |
| C | -4.488308907 | 12.226959229 | 17.106935501 |
| C | 4.122798920  | 0.151575565  | 17.104976654 |
| C | -2.026113033 | 12.227800369 | 17.100687027 |
| C | 6.581780434  | 0.155138493  | 17.130668640 |
| C | 0.433302879  | 12.228652954 | 17.170928955 |
| C | 9.042121887  | 0.158834413  | 17.218286514 |
| C | 2.891510487  | 12.235338211 | 17.275730133 |
| C | 11.502139091 | 0.161587521  | 17.264030457 |
| C | 5.352661610  | 12.234005928 | 17.259704590 |
| C | 13.961301804 | 0.157662556  | 17.217485428 |
| C | -0.800944448 | 1.577445388  | 17.202388763 |
| C | 0.428765535  | 2.286005497  | 17.171909332 |
| C | 1.662271738  | 1.571268916  | 17.150777817 |
| C | 2.892248631  | 2.269659758  | 17.118394852 |
| C | 4.124283314  | 1.569968939  | 17.118583679 |
| C | 5.354167938  | 2.281999111  | 17.135158539 |
| C | 6.582012177  | 1.575490355  | 17.138732910 |
| C | 7.812478542  | 2.288407087  | 17.152000427 |
| C | 9.041411400  | 1.579447150  | 17.188240051 |
| C | 10.270017624 | 2.289068222  | 17.190551758 |
| C | 11.500282288 | 1.579071760  | 17.223541260 |
| C | 12.729326248 | 2.286776543  | 17.205265045 |
| C | -2.033700705 | 3.707043409  | 17.175117493 |
| C | -0.808913112 | 4.415085793  | 17.171638489 |
| C | 0.419483185  | 3.700275183  | 17.163499832 |
| C | 1.660316944  | 4.421052933  | 17.156847000 |
| C | 2.901086807  | 3.694948912  | 17.113080978 |
| C | 4.136407852  | 4.402523994  | 17.180425644 |

|    |              |              |              |
|----|--------------|--------------|--------------|
| C  | 5.356215954  | 6.455091953  | 17.002622604 |
| C  | 6.582337379  | 5.757669449  | 17.123855591 |
| C  | 7.811107159  | 6.473011017  | 17.164928436 |
| C  | 9.036723137  | 5.764477730  | 17.223924637 |
| C  | 10.266908646 | 6.475319862  | 17.242338181 |
| C  | -4.490644932 | 7.894370079  | 17.237197876 |
| C  | -3.262300968 | 8.605459213  | 17.242126465 |
| C  | -2.034802675 | 7.894965649  | 17.223056793 |
| C  | -0.806169510 | 8.606303215  | 17.174966812 |
| C  | 0.418719769  | 7.898426533  | 17.092163086 |
| C  | 1.636131763  | 8.613352776  | 16.971139908 |
| C  | 2.859608650  | 7.896928310  | 16.772029877 |
| C  | 4.128139496  | 8.629107475  | 16.774688721 |
| C  | 5.367673874  | 7.891376495  | 16.886610031 |
| C  | 6.597002029  | 8.613759041  | 17.033433914 |
| C  | 7.817259312  | 7.894995689  | 17.137092590 |
| C  | 9.040812492  | 8.605949402  | 17.201908112 |
| C  | -5.721210003 | 10.026905060 | 17.212064743 |
| C  | -4.492712021 | 10.736649513 | 17.243396759 |
| C  | -3.262293339 | 10.026367188 | 17.242187500 |
| C  | -2.034025669 | 10.735796928 | 17.226108551 |
| C  | -0.804709911 | 10.026382446 | 17.178833008 |
| C  | 0.425114632  | 10.735565186 | 17.135532379 |
| C  | 1.650689602  | 10.027894974 | 17.035736084 |
| C  | 2.886715889  | 10.741358757 | 17.035301208 |
| C  | 4.119187355  | 10.046380997 | 16.971258163 |
| C  | 5.347030163  | 10.743583679 | 17.091970444 |
| C  | 6.582671165  | 10.033014297 | 17.102392197 |
| C  | 7.808722496  | 10.737768173 | 17.188169479 |
| Pt | 3.182937622  | 8.829756737  | 12.998270988 |
| Pt | 2.816349745  | 6.914447308  | 14.744468689 |
| Pt | 4.408218384  | 6.667492390  | 12.644161224 |
| Pt | 5.014361382  | 8.155820847  | 14.743202209 |

|   |              |             |              |
|---|--------------|-------------|--------------|
| C | 5.357470512  | 3.704137802 | 17.154541016 |
| C | 6.586941719  | 4.419429302 | 17.112171173 |
| C | 7.813545227  | 3.707908869 | 17.121002197 |
| C | 9.042448997  | 4.418177128 | 17.100379944 |
| C | 10.269711494 | 3.708310366 | 17.140308380 |
| C | 11.498096466 | 4.419018269 | 17.135065079 |
| C | -3.260239840 | 5.837498665 | 17.087026596 |
| C | -2.029981375 | 6.546036243 | 17.079149246 |
| C | -0.813199282 | 5.831909180 | 17.123149872 |
| C | 0.434450626  | 6.544865131 | 17.125888824 |
| C | 1.672107697  | 5.847388744 | 17.361206055 |
| C | 2.881558418  | 6.559474945 | 17.450868607 |
| C | 4.109015465  | 5.841714382 | 17.177961349 |
| C | 5.351112366  | 6.560070038 | 17.058748245 |
| C | 6.588024139  | 5.834490299 | 17.050762177 |
| C | 7.811837673  | 6.549290180 | 17.050474167 |
| C | 9.042736053  | 5.838473797 | 17.062957764 |
| C | 10.270207405 | 6.548419476 | 17.058834076 |
| C | -4.489746094 | 7.968931675 | 17.046413422 |
| C | -3.257668734 | 8.678777695 | 17.040521622 |
| C | -2.026421785 | 7.972092152 | 17.041112900 |
| C | -0.802739143 | 8.685763359 | 17.035520554 |
| C | 0.447431087  | 7.979683876 | 17.061922073 |
| C | 1.675721169  | 8.691618919 | 17.291246414 |
| C | 2.890771389  | 7.983432293 | 17.446319580 |
| C | 4.124763966  | 8.690182686 | 17.376457214 |
| C | 5.350572109  | 7.987921238 | 17.211177826 |
| C | 6.579098701  | 8.685075760 | 17.164447784 |
| C | 7.809369564  | 7.970179081 | 17.079103470 |
| C | 9.039384842  | 8.677962303 | 17.068656921 |

|   |              |              |              |
|---|--------------|--------------|--------------|
| C | -5.718841076 | 10.100056648 | 17.100130081 |
| C | -4.489939213 | 10.806890488 | 17.080408096 |
| C | -3.257552624 | 10.098529816 | 17.051450729 |
| C | -2.027831554 | 10.808012962 | 17.071239471 |
| C | -0.796968460 | 10.101076126 | 17.080692291 |
| C | 0.434456825  | 10.811603546 | 17.165075302 |
| C | 1.666280270  | 10.107741356 | 17.268686295 |
| C | 2.893191338  | 10.817440033 | 17.323350906 |

#### Pt<sub>4</sub> Isomer 6

|   |               |              |              |
|---|---------------|--------------|--------------|
| C | -6.971005440  | 12.169324875 | 17.297441483 |
| C | 1.638381004   | 0.095659465  | 17.316997528 |
| C | -4.5111115551 | 12.167212486 | 17.327697754 |
| C | 4.098841667   | 0.095289655  | 17.323453903 |
| C | -2.051895618  | 12.167768478 | 17.328239441 |
| C | 6.559148312   | 0.095477492  | 17.317874908 |
| C | 0.409204483   | 12.168757439 | 17.280529022 |
| C | 9.017720222   | 0.095800035  | 17.281581879 |
| C | 2.868815899   | 12.168575287 | 17.219427109 |
| C | 11.478748322  | 0.096441172  | 17.265869141 |
| C | 5.328808308   | 12.169285774 | 17.241981506 |
| C | 13.939940453  | 0.096713468  | 17.298671722 |
| C | -0.820866644  | 1.515832186  | 17.316940308 |
| C | 0.409170866   | 2.225090504  | 17.279949188 |
| C | 1.637701750   | 1.515522242  | 17.281118393 |
| C | 2.868814468   | 2.225246191  | 17.219564438 |
| C | 4.098749638   | 1.514863014  | 17.266466141 |
| C | 5.328779697   | 2.224570036  | 17.243236542 |
| C | 6.559905052   | 1.514601827  | 17.300029755 |
| C | 7.788958549   | 2.224517584  | 17.298892975 |
| C | 9.018404007   | 1.515680671  | 17.317922592 |
| C | 10.248931885  | 2.226620913  | 17.328271866 |
| C | 11.478907585  | 1.516026378  | 17.323226929 |
| C | 12.708127975  | 2.226102829  | 17.327724457 |
| C | -2.051546574  | 3.646325827  | 17.318490982 |
| C | -0.821940422  | 4.356127739  | 17.258350372 |
| C | 0.408456326   | 3.646127224  | 17.215293884 |
| C | 1.631807566   | 4.350296974  | 17.074045181 |
| C | 2.867238998   | 3.636643648  | 17.077018738 |
| C | 4.100301743   | 4.328278542  | 16.953357697 |
| C | 5.330678463   | 3.636095047  | 17.109323502 |
| C | 6.566006660   | 4.349874496  | 17.104274750 |
| C | 7.789817810   | 3.645548344  | 17.238309860 |
| C | 9.019138336   | 4.356092930  | 17.258743286 |
| C | 10.248734474  | 3.646114349  | 17.318971634 |
| C | 11.478978157  | 4.356002808  | 17.322570801 |
| C | -3.281655788  | 5.777066231  | 17.307601929 |
| C | -2.053009510  | 6.487239361  | 17.287475586 |

#### Pt<sub>4</sub> Isomer 7

|   |              |              |              |
|---|--------------|--------------|--------------|
| C | -6.982962132 | 12.233575821 | 17.475183487 |
| C | 1.628924370  | 0.161692426  | 17.453382492 |
| C | -4.521462440 | 12.235550880 | 17.391416550 |
| C | 4.089505672  | 0.163156301  | 17.330873489 |
| C | -2.061787128 | 12.236462593 | 17.250240326 |
| C | 6.546452045  | 0.163504958  | 17.212846756 |
| C | 0.396980762  | 12.240308762 | 17.182170868 |
| C | 9.006917000  | 0.166193679  | 17.226760864 |
| C | 2.855518341  | 12.238324165 | 17.283901215 |
| C | 11.464957237 | 0.164939970  | 17.374595642 |
| C | 5.314547062  | 12.236763954 | 17.439279556 |
| C | 13.924551964 | 0.162616432  | 17.475240707 |
| C | -0.835945487 | 1.584773421  | 17.453535080 |
| C | 0.395683408  | 2.294281006  | 17.444715500 |
| C | 1.627566814  | 1.583056927  | 17.444532394 |

|    |             |              |              |
|----|-------------|--------------|--------------|
| C  | 4.124144554 | 10.106755257 | 17.345947266 |
| C  | 5.354381561 | 10.813842773 | 17.278562546 |
| C  | 6.581663132 | 10.105359077 | 17.213275909 |
| C  | 7.811981201 | 10.811547279 | 17.164049149 |
| Pt | 4.185673237 | 6.295480728  | 15.043390274 |
| Pt | 2.156719446 | 4.683618546  | 14.973383904 |
| Pt | 0.964737415 | 6.994403362  | 15.014610291 |
| Pt | 2.514946222 | 6.343334198  | 13.069218636 |

|    |              |              |              |
|----|--------------|--------------|--------------|
| C  | -0.822998047 | 5.775958538  | 17.231422424 |
| C  | 0.399487734  | 6.483604431  | 17.099651337 |
| C  | 1.614675522  | 5.764214039  | 16.949428558 |
| C  | 2.828470945  | 6.471178055  | 16.652427673 |
| C  | 4.105181217  | 5.731924057  | 16.651073456 |
| C  | 5.362364769  | 6.458267689  | 16.639345169 |
| C  | 6.582088470  | 5.761247158  | 16.943820953 |
| C  | 7.797254562  | 6.483145714  | 17.064283371 |
| C  | 9.019049644  | 5.776442528  | 17.208532333 |
| C  | 10.249170303 | 6.487521648  | 17.270030975 |
| C  | -4.510884285 | 7.906332016  | 17.269842148 |
| C  | -3.281687737 | 8.616764069  | 17.307464600 |
| C  | -2.053005219 | 7.906628132  | 17.287460327 |
| C  | -0.822965622 | 8.617892265  | 17.231456757 |
| C  | 0.399500370  | 7.910290718  | 17.099670410 |
| C  | 1.614651203  | 8.629690170  | 16.949369431 |
| C  | 2.828374863  | 7.922655582  | 16.652301788 |
| C  | 4.105144978  | 8.661821365  | 16.650520325 |
| C  | 5.362336159  | 7.935329914  | 16.638877869 |
| C  | 6.582136631  | 8.632535934  | 16.942733765 |
| C  | 7.797281265  | 7.910695076  | 17.063720703 |
| C  | 9.019042969  | 8.617424011  | 17.207851410 |
| C  | -5.740865231 | 10.037750244 | 17.257694244 |
| C  | -4.511262894 | 10.747704506 | 17.318328857 |
| C  | -3.281005144 | 10.037817955 | 17.322364807 |
| C  | -2.051537037 | 10.747515678 | 17.318645477 |
| C  | -0.821929932 | 10.037699699 | 17.258571625 |
| C  | 0.408458233  | 10.747710228 | 17.215616226 |
| C  | 1.631805897  | 10.043574333 | 17.074090958 |
| C  | 2.867267609  | 10.757159233 | 17.076694489 |
| C  | 4.100313663  | 10.065532684 | 16.952459335 |
| C  | 5.330701351  | 10.757741928 | 17.107948303 |
| C  | 6.566013336  | 10.043939590 | 17.102682114 |
| C  | 7.789825439  | 10.748302460 | 17.236764908 |
| Pt | 4.124005318  | 7.194551945  | 12.449436188 |
| Pt | 4.851464272  | 5.866607189  | 14.586361885 |
| Pt | 4.851598740  | 8.524389267  | 14.585224152 |
| Pt | 2.611153603  | 7.196646214  | 14.570082664 |

|   |              |             |              |
|---|--------------|-------------|--------------|
| C | 2.857430935  | 2.290740013 | 17.376480103 |
| C | 4.090201378  | 1.582121968 | 17.321647644 |
| C | 5.320361137  | 2.290150404 | 17.223608017 |
| C | 6.549224854  | 1.582486272 | 17.199026108 |
| C | 7.778323174  | 2.292411566 | 17.163478851 |
| C | 9.008259773  | 1.585574627 | 17.219497681 |
| C | 10.236908913 | 2.294847965 | 17.259206772 |
| C | 11.464651108 | 1.585264325 | 17.352760315 |
| C | 12.695530891 | 2.295293808 | 17.391674042 |
| C | -2.064953566 | 3.716401339 | 17.331394196 |
| C | -0.836431980 | 4.426506042 | 17.322547913 |
| C | 0.393643379  | 3.713213205 | 17.376960754 |
| C | 1.621272564  | 4.419835091 | 17.302385330 |
| C | 2.855564594  | 3.707195044 | 17.302017212 |
| C | 4.086198807  | 4.401455879 | 17.143413544 |

|   |              |             |              |    |              |              |              |
|---|--------------|-------------|--------------|----|--------------|--------------|--------------|
| C | 5.325395584  | 3.705212116 | 17.126392365 | C  | 1.614799500  | 8.701192856  | 16.887111664 |
| C | 6.551471710  | 4.409179211 | 17.005418777 | C  | 2.869207859  | 7.994881153  | 16.881597519 |
| C | 7.778243065  | 3.711325645 | 17.083890915 | C  | 4.102173328  | 8.698737144  | 17.177509308 |
| C | 9.011659622  | 4.424266815 | 17.110267639 | C  | 5.320743084  | 7.995223999  | 17.176931381 |
| C | 10.235504150 | 3.715989590 | 17.208072662 | C  | 6.548804283  | 8.687933922  | 17.299741745 |
| C | 11.466472626 | 4.425882816 | 17.250616074 | C  | 7.783644199  | 7.975882530  | 17.217735291 |
| C | -3.293185234 | 5.844362736 | 17.213472366 | C  | 9.009436607  | 8.685321808  | 17.283756256 |
| C | -2.065673828 | 6.556258202 | 17.200290680 | C  | -5.751128197 | 10.104639053 | 17.374479294 |
| C | -0.838364363 | 5.845888138 | 17.224924088 | C  | -4.520911694 | 10.814538002 | 17.352767944 |
| C | 0.384581327  | 6.557787418 | 17.127897263 | C  | -3.292527676 | 10.106058121 | 17.259555817 |
| C | 1.607149601  | 5.832757473 | 17.144258499 | C  | -2.061095715 | 10.815449715 | 17.208450317 |
| C | 2.836272955  | 6.528835297 | 16.952802658 | C  | -0.835810184 | 10.109691620 | 17.111133575 |
| C | 4.074398994  | 5.813963413 | 16.952384949 | C  | 0.394908428  | 10.823755264 | 17.107032776 |
| C | 5.327528000  | 6.575543404 | 16.880428314 | C  | 1.626358509  | 10.126290321 | 17.054262161 |
| C | 6.566473484  | 5.842428684 | 16.885629654 | C  | 2.854022026  | 10.822201948 | 17.218381882 |
| C | 7.794887543  | 6.564869404 | 17.053277969 | C  | 4.088085175  | 10.108601570 | 17.300334930 |
| C | 9.014629364  | 5.847137928 | 17.106369019 | C  | 5.314677238  | 10.814354897 | 17.413698196 |
| C | 10.240366936 | 6.557160378 | 17.182285309 | C  | 6.546689987  | 10.103055954 | 17.413526535 |
| C | -4.521055222 | 7.976522446 | 17.226951599 | C  | 7.778581619  | 10.814157486 | 17.439208984 |
| C | -3.292505741 | 8.687375069 | 17.220191956 | Pt | 5.785645485  | 6.611990452  | 14.805561066 |
| C | -2.065427780 | 7.975634098 | 17.164688110 | Pt | 3.336265087  | 5.968671799  | 14.806293488 |
| C | -0.836575985 | 8.685032845 | 17.085344315 | Pt | 2.668124676  | 8.411471367  | 14.807429314 |
| C | 0.381111622  | 7.971541882 | 17.007114410 | Pt | 4.196371555  | 7.461104870  | 12.891751289 |

**Table S5.** Cartesian coordinates of 9 isomers of Pt<sub>5</sub>.

**Pt<sub>5</sub> Isomer 1**

|   |              |              |              |    |              |              |              |
|---|--------------|--------------|--------------|----|--------------|--------------|--------------|
| C | -6.899875641 | 12.126688004 | 17.272327423 | C  | -1.982463717 | 6.443644524  | 17.184066772 |
| C | 1.709236145  | 0.054674063  | 17.283956528 | C  | -0.751795769 | 5.728579044  | 17.159353256 |
| C | -4.440720558 | 12.127186775 | 17.277540207 | C  | 0.475271940  | 6.422782898  | 17.035066605 |
| C | 4.170302391  | 0.055937812  | 17.275619507 | C  | 1.695000410  | 5.719095230  | 17.036458969 |
| C | -1.980591297 | 12.129023552 | 17.250274658 | C  | 2.945920944  | 6.422550678  | 16.870658875 |
| C | 6.629539967  | 0.056290168  | 17.252687454 | C  | 4.186238289  | 5.723830223  | 17.084449768 |
| C | 0.480696678  | 12.129789352 | 17.209131241 | C  | 5.403771400  | 6.441944599  | 17.147956848 |
| C | 9.090688705  | 0.055987742  | 17.219985962 | C  | 6.630696297  | 5.735014915  | 17.231479645 |
| C | 2.939666271  | 12.127466202 | 17.179456711 | C  | 7.861112118  | 6.446212292  | 17.256727219 |
| C | 11.550403595 | 0.054445945  | 17.228958130 | C  | 9.090366364  | 5.736601353  | 17.276088715 |
| C | 5.399672031  | 12.126776695 | 17.226726532 | C  | 10.319687843 | 6.446894169  | 17.263156891 |
| C | 14.008841515 | 0.053055272  | 17.268043518 | C  | -4.442295551 | 7.865847111  | 17.255392075 |
| C | -0.751262307 | 1.472496510  | 17.279838562 | C  | -3.213852167 | 8.577689171  | 17.219404221 |
| C | 0.479085207  | 2.182083845  | 17.271213531 | C  | -1.987472296 | 7.867133141  | 17.153894424 |
| C | 1.708804131  | 1.474824190  | 17.275426865 | C  | -0.768786907 | 8.583545685  | 17.052225113 |
| C | 2.939650297  | 2.187707901  | 17.258649826 | C  | 0.460653305  | 7.857309818  | 16.876447678 |
| C | 4.171283245  | 1.475707889  | 17.274059296 | C  | 1.694609642  | 8.601853371  | 16.761768341 |
| C | 5.400830269  | 2.184127569  | 17.272888184 | C  | 2.967048645  | 7.866761684  | 16.746454239 |
| C | 6.630949020  | 1.474281907  | 17.274971008 | C  | 4.192489147  | 8.585493088  | 16.977600098 |
| C | 7.861615658  | 2.185244560  | 17.278739929 | C  | 5.405027866  | 7.869679451  | 17.113180161 |
| C | 9.090773582  | 1.475646377  | 17.266204834 | C  | 6.631061077  | 8.577459335  | 17.199832916 |
| C | 10.320303917 | 2.185174227  | 17.278110504 | C  | 7.860590935  | 7.866344929  | 17.248203278 |
| C | 11.549758911 | 1.473313689  | 17.269931793 | C  | 9.088193893  | 8.576525688  | 17.263282776 |
| C | 12.779111862 | 2.182757378  | 17.279457092 | C  | -5.670909882 | 9.997552872  | 17.265129089 |
| C | -1.981713414 | 3.602901459  | 17.267059326 | C  | -4.441282272 | 10.708395958 | 17.265449524 |
| C | -0.751565576 | 4.310936928  | 17.225521088 | C  | -3.211491108 | 9.997822762  | 17.231004715 |
| C | 0.477534533  | 3.601391315  | 17.229064941 | C  | -1.982233524 | 10.708342552 | 17.207550049 |
| C | 1.705869198  | 4.310019016  | 17.167547226 | C  | -0.755540371 | 10.000146866 | 17.119619370 |
| C | 2.940126181  | 3.602710485  | 17.202833176 | C  | 0.481575012  | 10.715673447 | 17.118141174 |
| C | 4.174692154  | 4.312505245  | 17.189542770 | C  | 1.707972527  | 10.020901680 | 16.995117188 |
| C | 5.402993679  | 3.604208469  | 17.248331070 | C  | 2.938694000  | 10.712586403 | 17.070997238 |
| C | 6.631539345  | 4.315204144  | 17.254692078 | C  | 4.176456928  | 9.997361183  | 17.063558578 |
| C | 7.862160683  | 3.605262041  | 17.279760361 | C  | 5.400549412  | 10.706119537 | 17.172246933 |
| C | 9.090658188  | 4.315091133  | 17.284515381 | C  | 6.630635738  | 9.996765137  | 17.207918167 |
| C | 10.320643425 | 3.604824066  | 17.286554337 | C  | 7.860146523  | 10.707119942 | 17.255672455 |
| C | 11.550716400 | 4.314169884  | 17.271339417 | Pt | 0.843953133  | 8.317543983  | 14.762861252 |
| C | -3.207945824 | 5.736202240  | 17.246700287 | Pt | 3.027430534  | 7.011410713  | 14.746255875 |

Pt 2.931477547 7.045572281 12.267078400  
Pt 0.921859264 8.404910088 12.284221649

**Pt<sub>5</sub> Isomer 2**

C -6.921015263 12.182233810 17.260854721  
C 1.688935995 0.109102055 17.300100327  
C -4.460697174 12.182312012 17.320543289  
C 4.148892403 0.109669738 17.346179962  
C -2.000781536 12.182840347 17.341606140  
C 6.610305309 0.111099124 17.342285156  
C 0.459435463 12.185504913 17.310411453  
C 9.069448471 0.112628594 17.291831970  
C 2.919197559 12.185323715 17.246974945  
C 11.530113220 0.111658022 17.233928680  
C 5.379840851 12.185406685 17.215692520  
C 13.990387917 0.110460043 17.241266251  
C -0.770127058 1.529204845 17.235948563  
C 0.460718513 2.238128901 17.251976013  
C 1.690481186 1.528376579 17.298246384  
C 2.920442820 2.238039494 17.319250107  
C 4.149717808 1.529910445 17.347799301  
C 5.380847454 2.240700245 17.348114014  
C 6.611208439 1.531297803 17.346832275  
C 7.840795040 2.241211176 17.320821762  
C 9.071017265 1.531912684 17.296274185  
C 10.300968170 2.241289616 17.256654739  
C 11.529546738 1.530466676 17.237846375  
C 12.760137558 2.237982512 17.213699341  
C -2.000144720 3.656247616 17.164831161  
C -0.768270969 4.354085922 17.109170914  
C 0.461583853 3.653685808 17.196596146  
C 1.695095301 4.364766121 17.208457947  
C 2.921057940 3.658179522 17.282104492  
C 4.151939869 4.368824959 17.282888412  
C 5.382169247 3.659316063 17.320158005  
C 6.611778259 4.369657993 17.299131393  
C 7.841665745 3.661351919 17.299533844  
C 9.070959091 4.371805668 17.257999420  
C 10.302453995 3.662453175 17.233715057  
C 11.529558182 4.370879173 17.177364349  
C -3.234141827 5.793680191 17.162015915  
C -2.013909340 6.511420727 17.104057312  
C -0.777466059 5.786833286 16.995637894

**Pt<sub>5</sub> Isomer 3**

C -6.907557487 12.106749535 17.228391647  
C 1.702708721 0.035984140 17.210445404  
C -4.447143078 12.106517792 17.241373062  
C 4.163208961 0.033326093 17.237857819  
C -1.987729073 12.106046677 17.254264832  
C 6.622358322 0.032887124 17.252227783  
C 0.471683979 12.105436325 17.233119965  
C 9.081820488 0.031854097 17.233699799  
C 2.932223797 12.102183342 17.205461502  
C 11.542718887 0.031900357 17.222806931  
C 5.392533302 12.106571198 17.220783234  
C 14.002241135 0.032183267 17.217817307  
C -0.761158764 1.450314283 17.197359085  
C 0.467936516 2.156961441 17.141836166  
C 1.701909661 1.451736808 17.153472900  
C 2.937210083 2.162614107 17.138172150  
C 4.166424274 1.451996088 17.204517365  
C 5.394892693 2.161514759 17.230636597  
C 6.624240398 1.452094078 17.259796143  
C 7.853499413 2.161789656 17.280612946

Pt 4.756580353 5.811820507 13.309175491

C 0.471734524 6.507763386 16.967508316  
C 1.705558300 5.777803421 17.109466553  
C 2.923984289 6.481314182 17.110975266  
C 4.152922153 5.783913612 17.210674286  
C 5.385476112 6.496647358 17.200347900  
C 6.611906052 5.789576530 17.254032135  
C 7.841300964 6.501052856 17.236679077  
C 9.069684982 5.791190624 17.238437653  
C 10.297694206 6.503108501 17.210494995  
C -4.461245060 7.922505379 17.229967117  
C -3.231936455 8.634038925 17.241914749  
C -2.005642176 7.926913738 17.186042786  
C -0.773077488 8.639659882 17.195890427  
C 0.455963612 7.941960335 17.101482391  
C 1.674487591 8.645502090 17.103578568  
C 2.908792019 7.914914131 16.971141815  
C 4.157660961 8.636181831 17.001274109  
C 5.393786430 7.911933899 17.114723206  
C 6.614068031 8.629799843 17.170381546  
C 7.842288494 7.920444489 17.216165543  
C 9.070350647 8.632371902 17.237884521  
C -5.690928459 10.051733971 17.257968903  
C -4.461585045 10.762211800 17.295476913  
C -3.231720686 10.053936005 17.288709641  
C -2.002160072 10.764304161 17.308197021  
C -0.772088528 10.054810524 17.268335342  
C 0.458761215 10.765427589 17.270053864  
C 1.684805870 10.058679581 17.199798584  
C 2.918376923 10.769707680 17.192195892  
C 4.148375988 10.069140434 17.110872269  
C 5.380064011 10.767051697 17.168931961  
C 6.610371590 10.052541733 17.183519363  
C 7.837509155 10.761045456 17.237798691  
Pt -0.130088329 6.120355129 12.420996666  
Pt 3.604191780 8.308867455 14.905929565  
Pt 3.541715622 8.258344650 12.425025940  
Pt -0.213700771 6.098444939 14.901713371  
Pt 1.700871468 7.195830345 13.640213966

C 9.082814217 1.450922489 17.269216537  
C 10.312518120 2.162283421 17.276475906  
C 11.541488647 1.451609969 17.246397018  
C 12.770736694 2.161540270 17.227674484  
C -1.989974737 3.582695961 17.241994858  
C -0.762550473 4.291171074 17.173728943  
C 0.455922842 3.571738720 17.079223633  
C 1.699730396 4.274271965 16.930219650  
C 2.947966814 3.571749210 17.055458069  
C 4.170042038 4.289675713 17.126146317  
C 5.396837234 3.581431150 17.219860077  
C 6.624217510 4.292453289 17.272165298  
C 7.853698254 3.582398653 17.299785614  
C 9.082293510 4.293111324 17.321895599  
C 10.312591553 3.582503796 17.306371689  
C 11.541603088 4.293500423 17.296337128  
C -3.218762636 5.715007305 17.314037323  
C -1.989881396 6.425976753 17.277231216  
C -0.763715744 5.718490601 17.196517944  
C 0.453636408 6.430889606 17.084337234

|   |              |             |              |
|---|--------------|-------------|--------------|
| C | 1.677776337  | 5.711046219 | 16.884571075 |
| C | 2.955018282  | 6.427106857 | 16.862951279 |
| C | 4.182214737  | 5.707641125 | 17.076814651 |
| C | 5.395773888  | 6.421236515 | 17.196819305 |
| C | 6.623335361  | 5.713365555 | 17.276729584 |
| C | 7.852199554  | 6.424420357 | 17.318202972 |
| C | 9.081448555  | 5.714129925 | 17.335018158 |
| C | 10.311859131 | 6.425186157 | 17.335731506 |
| C | -4.448451996 | 7.845867634 | 17.327816010 |
| C | -3.219003201 | 8.556510925 | 17.305000305 |
| C | -1.989710331 | 7.847351074 | 17.275621414 |
| C | -0.761771679 | 8.557852745 | 17.220186234 |
| C | 0.465958118  | 7.850570679 | 17.125108719 |
| C | 1.688489914  | 8.566901207 | 17.051069260 |
| C | 2.938814640  | 7.868196011 | 16.917253494 |
| C | 4.180610657  | 8.567553520 | 17.105369568 |
| C | 5.395196438  | 7.849768639 | 17.197385788 |
| C | 6.623301983  | 8.556746483 | 17.262998581 |
| C | 7.852339745  | 7.846222878 | 17.308141708 |

#### Pt5 Isomer 4

|   |              |              |              |
|---|--------------|--------------|--------------|
| C | -6.940713882 | 12.146049500 | 17.196561813 |
| C | 1.668501973  | 0.072596900  | 17.284070969 |
| C | -4.482930183 | 12.146444321 | 17.339155197 |
| C | 4.126880169  | 0.073941976  | 17.385351181 |
| C | -2.021297455 | 12.147800446 | 17.397161484 |
| C | 6.587132454  | 0.076950379  | 17.381097794 |
| C | 0.437659264  | 12.153041840 | 17.329315186 |
| C | 9.046760559  | 0.078811973  | 17.260324478 |
| C | 2.894545078  | 12.154419899 | 17.159158707 |
| C | 11.507894516 | 0.078500681  | 17.119676590 |
| C | 5.362089157  | 12.152151108 | 17.081769943 |
| C | 13.970400810 | 0.074497655  | 17.146923065 |
| C | -0.792739987 | 1.493851542  | 17.163719177 |
| C | 0.437030911  | 2.202376366  | 17.224090576 |
| C | 1.668300509  | 1.492067575  | 17.295957565 |
| C | 2.897057772  | 2.200343370  | 17.346776962 |
| C | 4.127366543  | 1.492924571  | 17.381593704 |
| C | 5.358519077  | 2.205587626  | 17.377637863 |
| C | 6.588616848  | 1.497508287  | 17.369125366 |
| C | 7.817438602  | 2.207596779  | 17.314888000 |
| C | 9.048441887  | 1.498882890  | 17.262363434 |
| C | 10.276071548 | 2.205139637  | 17.192575455 |
| C | 11.506277084 | 1.492858410  | 17.146680832 |
| C | 12.738292694 | 2.200870752  | 17.131235123 |
| C | -2.023703575 | 3.619433403  | 17.099248886 |
| C | -0.793842196 | 4.317677498  | 17.076120377 |
| C | 0.434808969  | 3.616235495  | 17.194820404 |
| C | 1.669657946  | 4.325231552  | 17.265871048 |
| C | 2.897968769  | 3.621006489  | 17.326852798 |
| C | 4.128238201  | 4.333226681  | 17.314155579 |
| C | 5.360123634  | 3.623664618  | 17.338985443 |
| C | 6.587409019  | 4.334919930  | 17.297409058 |
| C | 7.817594528  | 3.626482964  | 17.286399841 |
| C | 9.047302246  | 4.335954666  | 17.226379395 |
| C | 10.277204514 | 3.626685619  | 17.179374695 |
| C | 11.504650116 | 4.335546970  | 17.119895935 |
| C | -3.259349823 | 5.756598949  | 17.137378693 |
| C | -2.037730217 | 6.473435402  | 17.110071182 |
| C | -0.806673527 | 5.748942375  | 16.990556717 |

#### Pt5 Isomer 5

|   |              |              |              |
|---|--------------|--------------|--------------|
| C | -6.931604862 | 12.177978516 | 17.281053543 |
| C | 1.678210735  | 0.105035909  | 17.299558640 |
| C | -4.472851276 | 12.178693771 | 17.298353195 |

|    |              |              |              |
|----|--------------|--------------|--------------|
| C  | 9.081401825  | 8.556407928  | 17.316820145 |
| C  | -5.677953243 | 9.976936340  | 17.288454056 |
| C  | -4.448247910 | 10.688055038 | 17.278129578 |
| C  | -3.218686581 | 9.977226257  | 17.286209106 |
| C  | -1.989690304 | 10.686596870 | 17.261949539 |
| C  | -0.760136127 | 9.977227211  | 17.229612350 |
| C  | 0.468659401  | 10.686639786 | 17.201412201 |
| C  | 1.697896957  | 9.976777077  | 17.136547089 |
| C  | 2.933268070  | 10.686508179 | 17.155868530 |
| C  | 4.167852402  | 9.979909897  | 17.164245605 |
| C  | 5.396217823  | 10.688092232 | 17.215248108 |
| C  | 6.623952866  | 9.977300644  | 17.246459961 |
| C  | 7.853774071  | 10.687185287 | 17.259475708 |
| Pt | 1.593030214  | 4.988266945  | 12.339386940 |
| Pt | 3.023175716  | 6.940820694  | 12.324122429 |
| Pt | 2.994729042  | 7.116576195  | 14.806550980 |
| Pt | 1.565566778  | 4.981066227  | 14.822643280 |
| Pt | 4.155415058  | 8.839239120  | 13.341952324 |

|    |              |              |              |
|----|--------------|--------------|--------------|
| C  | 0.440395832  | 6.462593079  | 17.040031433 |
| C  | 1.680807590  | 5.734703064  | 17.205368042 |
| C  | 2.900376558  | 6.438292027  | 17.167316437 |
| C  | 4.129821777  | 5.746676922  | 17.222738266 |
| C  | 5.362622261  | 6.465243340  | 17.166286469 |
| C  | 6.587945938  | 5.756022930  | 17.233232498 |
| C  | 7.816770077  | 6.466099739  | 17.212789536 |
| C  | 9.046374321  | 5.755388260  | 17.215894699 |
| C  | 10.272473335 | 6.466273785  | 17.199743271 |
| C  | -4.486364841 | 7.886377811  | 17.241830826 |
| C  | -3.257027149 | 8.595889091  | 17.292383194 |
| C  | -2.030604362 | 7.884406567  | 17.250547409 |
| C  | -0.801230431 | 8.599266052  | 17.296266556 |
| C  | 0.417913437  | 7.899893761  | 17.192373276 |
| C  | 1.652289391  | 8.609860420  | 17.076404572 |
| C  | 2.881588936  | 7.857364655  | 16.926866531 |
| C  | 4.144291878  | 8.589335442  | 16.803382874 |
| C  | 5.375682831  | 7.873707294  | 17.034177780 |
| C  | 6.591136456  | 8.591036797  | 17.096076965 |
| C  | 7.818227768  | 7.884571075  | 17.185005188 |
| C  | 9.047161102  | 8.596565247  | 17.227294922 |
| C  | -5.711535931 | 10.016123772 | 17.243175507 |
| C  | -4.483651638 | 10.724514008 | 17.319522858 |
| C  | -3.254286528 | 10.014622688 | 17.348340988 |
| C  | -2.021443367 | 10.726628304 | 17.382591248 |
| C  | -0.794126987 | 10.019792557 | 17.354053497 |
| C  | 0.437865257  | 10.734081268 | 17.309602737 |
| C  | 1.664965153  | 10.042671204 | 17.176092148 |
| C  | 2.886379719  | 10.742156982 | 17.081640244 |
| C  | 4.126286030  | 10.036573410 | 16.887580872 |
| C  | 5.369665623  | 10.736521721 | 17.000215530 |
| C  | 6.592877388  | 10.019154549 | 17.068210602 |
| C  | 7.818389893  | 10.726947784 | 17.170045853 |
| Pt | 0.843509197  | 7.370632648  | 12.743373871 |
| Pt | 4.108437061  | 9.265180588  | 14.740961075 |
| Pt | 3.378047466  | 7.728715897  | 12.842554092 |
| Pt | 0.044221163  | 6.294658184  | 14.905494690 |
| Pt | 1.913835049  | 8.013988495  | 14.950198174 |

|   |              |              |              |
|---|--------------|--------------|--------------|
| C | 4.139050961  | 0.105136573  | 17.302202225 |
| C | -2.011324406 | 12.179464340 | 17.267400742 |
| C | 6.596936226  | 0.106177755  | 17.269550323 |



|   |              |              |              |
|---|--------------|--------------|--------------|
| C | 0.448985100  | 12.179695129 | 17.221935272 |
| C | 9.056506157  | 0.108241573  | 17.252384186 |
| C | 2.905655861  | 12.181940079 | 17.234655380 |
| C | 11.518621445 | 0.108556062  | 17.257240295 |
| C | 5.368789673  | 12.181531906 | 17.244773865 |
| C | 13.977118492 | 0.106577829  | 17.270305634 |
| C | -0.783391297 | 1.526326895  | 17.267410278 |
| C | 0.448464274  | 2.237239361  | 17.266881943 |
| C | 1.679657459  | 1.525760055  | 17.295886993 |
| C | 2.908527374  | 2.232133865  | 17.304460526 |
| C | 4.139893532  | 1.523766994  | 17.316219330 |
| C | 5.369462967  | 2.233688354  | 17.317996979 |
| C | 6.598437309  | 1.525134325  | 17.305633545 |
| C | 7.828366280  | 2.237543821  | 17.303503036 |
| C | 9.058357239  | 1.528544426  | 17.286718369 |
| C | 10.286715508 | 2.237076521  | 17.280029297 |
| C | 11.517919540 | 1.525058270  | 17.270252228 |
| C | 12.747999191 | 2.233766079  | 17.256481171 |
| C | -2.012631655 | 3.654466391  | 17.217248917 |
| C | -0.785344362 | 4.356663227  | 17.165199280 |
| C | 0.448543072  | 3.651594639  | 17.214591980 |
| C | 1.683529377  | 4.358566284  | 17.207830429 |
| C | 2.910654545  | 3.652003527  | 17.272218704 |
| C | 4.140955925  | 4.362302303  | 17.274925232 |
| C | 5.371704578  | 3.654242039  | 17.308429718 |
| C | 6.597942352  | 4.365240097  | 17.301946640 |
| C | 7.829074860  | 3.656239986  | 17.304607391 |
| C | 9.058572769  | 4.366479874  | 17.283752441 |
| C | 10.287123680 | 3.657227755  | 17.269151688 |
| C | 11.517292023 | 4.367726326  | 17.223505020 |
| C | -3.244365454 | 5.786418438  | 17.193834305 |
| C | -2.019280910 | 6.497981548  | 17.113281250 |
| C | -0.793217421 | 5.776121616  | 17.061727524 |
| C | 0.457986116  | 6.480873108  | 16.943489075 |
| C | 1.699366093  | 5.769588947  | 17.099531174 |
| C | 2.912631035  | 6.470043659  | 17.105159760 |

### Pts Isomer 6

|   |              |              |              |
|---|--------------|--------------|--------------|
| C | -6.931981564 | 12.159794807 | 17.237716675 |
| C | 1.674916863  | 0.083250538  | 17.198448181 |
| C | -4.473652363 | 12.157292366 | 17.152660370 |
| C | 4.135163307  | 0.085774302  | 17.084568024 |
| C | -2.016607761 | 12.159983635 | 17.052753448 |
| C | 6.593447208  | 0.086393483  | 17.019580841 |
| C | 0.444287300  | 12.161481857 | 17.004146576 |
| C | 9.053277969  | 0.087078720  | 17.051609039 |
| C | 2.907930851  | 12.162486076 | 17.106803894 |
| C | 11.517489433 | 0.088426702  | 17.184885025 |
| C | 5.365230083  | 12.162369728 | 17.228443146 |
| C | 13.976374626 | 0.087184042  | 17.247671127 |
| C | -0.787660956 | 1.502923846  | 17.248050690 |
| C | 0.443476796  | 2.210332155  | 17.230163574 |
| C | 1.671221018  | 1.501691580  | 17.187454224 |
| C | 2.900835514  | 2.210200548  | 17.110534668 |
| C | 4.135457993  | 1.503051758  | 17.054944992 |
| C | 5.364408016  | 2.211153746  | 17.007884979 |
| C | 6.595238686  | 1.503703952  | 17.021013260 |
| C | 7.825260162  | 2.212658644  | 17.054084778 |
| C | 9.053521156  | 1.504316211  | 17.083454132 |
| C | 10.282336235 | 2.215319395  | 17.152130127 |
| C | 11.513807297 | 1.506849289  | 17.197078705 |
| C | 12.740690231 | 2.212853670  | 17.237623215 |
| C | -2.022593260 | 3.632963896  | 17.229749680 |
| C | -0.796062350 | 4.340610981  | 17.217983246 |
| C | 0.441043615  | 3.629151106  | 17.221891403 |

|    |              |              |              |
|----|--------------|--------------|--------------|
| C  | 4.142486572  | 5.778405190  | 17.215034485 |
| C  | 5.372418880  | 6.494373798  | 17.224695206 |
| C  | 6.597472668  | 5.787198544  | 17.274379730 |
| C  | 7.829143524  | 6.498594761  | 17.271663666 |
| C  | 9.058565140  | 5.788356304  | 17.271278381 |
| C  | 10.285473824 | 6.498300076  | 17.240465164 |
| C  | -4.473855972 | 7.918414116  | 17.250860214 |
| C  | -3.243272066 | 8.631468773  | 17.224206924 |
| C  | -2.018342257 | 7.928845406  | 17.135046005 |
| C  | -0.799377918 | 8.640532494  | 17.024480820 |
| C  | 0.425134182  | 7.917093754  | 16.783779144 |
| C  | 1.692368507  | 8.648535728  | 16.792089462 |
| C  | 2.917486191  | 7.901119709  | 16.957584381 |
| C  | 4.153478622  | 8.631853104  | 17.073856354 |
| C  | 5.379339218  | 7.915195942  | 17.175987244 |
| C  | 6.600761890  | 8.627207756  | 17.223943710 |
| C  | 7.830922127  | 7.916350842  | 17.259504318 |
| C  | 9.059740067  | 8.627275467  | 17.267791748 |
| C  | -5.701426983 | 10.049512863 | 17.276538849 |
| C  | -4.473714352 | 10.758955956 | 17.280590057 |
| C  | -3.242827415 | 10.050306320 | 17.243942261 |
| C  | -2.013256073 | 10.757950783 | 17.216320038 |
| C  | -0.788124084 | 10.050158501 | 17.113300323 |
| C  | 0.449485302  | 10.764819145 | 17.117536545 |
| C  | 1.676173687  | 10.070035934 | 17.034929276 |
| C  | 2.901618004  | 10.770020485 | 17.147928238 |
| C  | 4.141232014  | 10.055301666 | 17.124036789 |
| C  | 5.370360851  | 10.760251999 | 17.200759888 |
| C  | 6.597948074  | 10.049267769 | 17.227977753 |
| C  | 7.828409195  | 10.759355545 | 17.268529892 |
| Pt | -0.100590944 | 6.805757999  | 14.905022621 |
| Pt | 3.509950161  | 8.804229736  | 12.501526833 |
| Pt | 2.948858261  | 8.568510056  | 14.925208092 |
| Pt | -0.553299904 | 6.449528694  | 12.473006248 |
| Pt | 1.530440807  | 7.529348850  | 13.089059830 |

|   |              |             |              |
|---|--------------|-------------|--------------|
| C | 1.666123867  | 4.325148582 | 17.168247223 |
| C | 2.891653061  | 3.619026184 | 17.087131500 |
| C | 4.130391121  | 4.335681438 | 16.956903458 |
| C | 5.371669292  | 3.630368233 | 16.988809586 |
| C | 6.597455502  | 4.338708878 | 17.073493958 |
| C | 7.825265884  | 3.632045984 | 17.093267441 |
| C | 9.051951408  | 4.343484879 | 17.146913528 |
| C | 10.279821396 | 3.632244825 | 17.170717239 |
| C | 11.509573936 | 4.343478680 | 17.201707840 |
| C | -3.252824068 | 5.762956142 | 17.190275192 |
| C | -2.026364803 | 6.472985268 | 17.168870926 |
| C | -0.808620214 | 5.751563072 | 17.150810242 |
| C | 0.423226833  | 6.473661900 | 17.076278687 |
| C | 1.676055908  | 5.764593124 | 17.129138947 |
| C | 2.904566288  | 6.488721371 | 17.341815948 |
| C | 4.132237434  | 5.774837494 | 17.082859039 |
| C | 5.389429092  | 6.466883183 | 17.128311157 |
| C | 6.603543282  | 5.759844780 | 17.131135941 |
| C | 7.831347466  | 6.476765156 | 17.158079147 |
| C | 9.053201675  | 5.765659809 | 17.167539597 |
| C | 10.282176018 | 6.477281570 | 17.184307098 |
| C | -4.473474503 | 7.895310879 | 17.183580399 |
| C | -3.244536400 | 8.606927872 | 17.165195465 |
| C | -2.022687435 | 7.895843506 | 17.155546188 |
| C | -0.794898033 | 8.612775803 | 17.127300262 |
| C | 0.419239521  | 7.905757427 | 17.125392914 |
| C | 1.676484585  | 8.597870827 | 17.080381393 |

|   |              |              |              |
|---|--------------|--------------|--------------|
| C | 2.903838158  | 7.884243011  | 17.341474533 |
| C | 4.132564068  | 8.608080864  | 17.129293442 |
| C | 5.385424614  | 7.898900986  | 17.077848434 |
| C | 6.617304802  | 8.621029854  | 17.151424408 |
| C | 7.835081100  | 7.899605751  | 17.169721603 |
| C | 9.061546326  | 8.609654427  | 17.189729691 |
| C | -5.700897694 | 10.029145241 | 17.200672150 |
| C | -4.471154213 | 10.740349770 | 17.169439316 |
| C | -3.243284464 | 10.029109955 | 17.144250870 |
| C | -2.016608715 | 10.740540504 | 17.089914322 |
| C | -0.788794994 | 10.033904076 | 17.068920135 |
| C | 0.436954498  | 10.742279053 | 16.984006882 |

### Pt5 Isomer 7

|   |              |              |              |
|---|--------------|--------------|--------------|
| C | -6.965130329 | 12.135047913 | 17.138050079 |
| C | 1.644816041  | 0.061716095  | 17.175024033 |
| C | -4.505606651 | 12.135591507 | 17.199666977 |
| C | 4.103623867  | 0.064337455  | 17.237136841 |
| C | -2.045418739 | 12.135859489 | 17.245162964 |
| C | 6.564666748  | 0.063847817  | 17.251804352 |
| C | 0.414083004  | 12.136732101 | 17.243478775 |
| C | 9.025178909  | 0.064327240  | 17.224205017 |
| C | 2.874863148  | 12.137914658 | 17.197107315 |
| C | 11.484455109 | 0.062898666  | 17.163938522 |
| C | 5.335274220  | 12.133399963 | 17.131391525 |
| C | 13.945755005 | 0.061451517  | 17.132770538 |
| C | -0.815562665 | 1.480642438  | 17.131668091 |
| C | 0.413604617  | 2.189035177  | 17.134273529 |
| C | 1.643110752  | 1.480208158  | 17.176570892 |
| C | 2.872406483  | 2.190381050  | 17.213209152 |
| C | 4.103723049  | 1.482667565  | 17.242712021 |
| C | 5.336860180  | 2.194812059  | 17.237316132 |
| C | 6.567251205  | 1.483750701  | 17.241014481 |
| C | 7.797111988  | 2.191975832  | 17.215427399 |
| C | 9.027353287  | 1.482565284  | 17.208639145 |
| C | 10.256633759 | 2.192122221  | 17.169944763 |
| C | 11.485926628 | 1.481945515  | 17.155048370 |
| C | 12.715681076 | 2.192320585  | 17.125192642 |
| C | -2.043272495 | 3.612308264  | 17.101247787 |
| C | -0.816020489 | 4.321794510  | 17.070726395 |
| C | 0.412910938  | 3.607823610  | 17.086921692 |
| C | 1.643722296  | 4.307949543  | 17.068950653 |
| C | 2.869109392  | 3.607520103  | 17.179683685 |
| C | 4.105380058  | 4.315830231  | 17.184713364 |
| C | 5.338994980  | 3.609771013  | 17.196409225 |
| C | 6.571771622  | 4.319484711  | 17.142995834 |
| C | 7.800381184  | 3.610141039  | 17.171262741 |
| C | 9.028183937  | 4.322110176  | 17.136543274 |
| C | 10.258446693 | 3.612318516  | 17.141141891 |
| C | 11.485224724 | 4.322927475  | 17.112167358 |
| C | -3.276354790 | 5.743391991  | 17.108875275 |
| C | -2.048254728 | 6.456195354  | 17.107707977 |
| C | -0.819057703 | 5.745532990  | 17.069248199 |

### Pt5 Isomer 8

|   |              |              |              |
|---|--------------|--------------|--------------|
| C | -6.944902420 | 12.174220085 | 17.159688950 |
| C | 1.664641261  | 0.102058813  | 17.162292480 |
| C | -4.485692024 | 12.173856735 | 17.174800873 |
| C | 4.124363899  | 0.102229185  | 17.178924561 |
| C | -2.026206017 | 12.174201965 | 17.192518234 |
| C | 6.583849907  | 0.101229884  | 17.193611145 |
| C | 0.433569908  | 12.174685478 | 17.192899704 |
| C | 9.044112206  | 0.099961609  | 17.181236267 |
| C | 2.894855499  | 12.170874596 | 17.161819458 |
| C | 11.505572319 | 0.100378007  | 17.157789230 |

|    |             |              |              |
|----|-------------|--------------|--------------|
| C  | 1.678347588 | 10.036958694 | 16.952671051 |
| C  | 2.917099476 | 10.753678322 | 17.083654404 |
| C  | 4.142556190 | 10.047592163 | 17.166646957 |
| C  | 5.367676258 | 10.743588448 | 17.220531464 |
| C  | 6.604784966 | 10.032077789 | 17.217384338 |
| C  | 7.831297874 | 10.739709854 | 17.229059219 |
| Pt | 2.906331539 | 7.186593056  | 13.101572037 |
| Pt | 3.859445572 | 5.499482155  | 14.903178215 |
| Pt | 1.331594229 | 6.294273853  | 14.987935066 |
| Pt | 1.951311111 | 8.874536514  | 14.901432037 |
| Pt | 4.479291916 | 8.079051018  | 14.988717079 |

|    |              |              |              |
|----|--------------|--------------|--------------|
| C  | 0.400190592  | 6.461052418  | 17.047605515 |
| C  | 1.635076523  | 5.737807751  | 16.958805084 |
| C  | 2.878494024  | 6.456040382  | 17.027154922 |
| C  | 4.107262611  | 5.719181061  | 17.093776703 |
| C  | 5.339124680  | 6.435986519  | 16.930284500 |
| C  | 6.584257126  | 5.730648994  | 17.041032791 |
| C  | 7.799434662  | 6.448943615  | 17.053993225 |
| C  | 9.028343201  | 5.741335392  | 17.101163864 |
| C  | 10.256166458 | 6.453588963  | 17.106872559 |
| C  | -4.504781246 | 7.874719143  | 17.113452911 |
| C  | -3.277541161 | 8.585393906  | 17.149660110 |
| C  | -2.047848940 | 7.874349594  | 17.144701004 |
| C  | -0.817938328 | 8.585336685  | 17.178945541 |
| C  | 0.407133102  | 7.876296520  | 17.145097733 |
| C  | 1.639724731  | 8.591874123  | 17.172620773 |
| C  | 2.869928837  | 7.895249844  | 17.114906311 |
| C  | 4.092901230  | 8.599873543  | 17.069103241 |
| C  | 5.332159519  | 7.885468960  | 16.900091171 |
| C  | 6.576723099  | 8.592176437  | 16.987453461 |
| C  | 7.797240734  | 7.87629965   | 17.034261703 |
| C  | 9.025256157  | 8.585349083  | 17.088468552 |
| C  | -5.734208107 | 10.005367279 | 17.115629196 |
| C  | -4.505126953 | 10.715234756 | 17.169784546 |
| C  | -3.276697874 | 10.005557060 | 17.184638977 |
| C  | -2.046310425 | 10.716753960 | 17.224081039 |
| C  | -0.816817760 | 10.007053375 | 17.221611023 |
| C  | 0.411524773  | 10.717592239 | 17.232736588 |
| C  | 1.642308235  | 10.008621216 | 17.207408905 |
| C  | 2.872541428  | 10.718702316 | 17.186950684 |
| C  | 4.101604939  | 10.012187004 | 17.123010635 |
| C  | 5.335577011  | 10.718398094 | 17.097402573 |
| C  | 6.568004131  | 10.007535934 | 17.058444977 |
| C  | 7.796410561  | 10.715799332 | 17.104703903 |
| Pt | 2.605985165  | 6.240029335  | 14.879306793 |
| Pt | 2.788325071  | 5.727296352  | 12.490842819 |
| Pt | 5.101039886  | 6.805755615  | 12.387708664 |
| Pt | 5.064128399  | 7.077943802  | 14.818621635 |
| Pt | 3.195585251  | 7.685448170  | 11.039928436 |

|   |              |              |              |
|---|--------------|--------------|--------------|
| C | 5.355765343  | 12.175084114 | 17.152215958 |
| C | 13.965542793 | 0.101696327  | 17.155879974 |
| C | -0.795772254 | 1.520656109  | 17.160282135 |
| C | 0.434051394  | 2.230101347  | 17.158641815 |
| C | 1.663766742  | 1.521947980  | 17.155061722 |
| C | 2.894805193  | 2.234313726  | 17.152210236 |
| C | 4.125675678  | 1.521710753  | 17.169010162 |
| C | 5.356129646  | 2.229462862  | 17.181470871 |
| C | 6.585667610  | 1.520103931  | 17.191452026 |
| C | 7.815906525  | 2.229588032  | 17.195314407 |

|   |              |             |              |
|---|--------------|-------------|--------------|
| C | 9.045439720  | 1.519510508 | 17.187688828 |
| C | 10.275141716 | 2.230232954 | 17.184370041 |
| C | 11.504859924 | 1.519962192 | 17.169734955 |
| C | 12.734405518 | 2.230238676 | 17.169069290 |
| C | -2.026413441 | 3.650683880 | 17.181758881 |
| C | -0.796359420 | 4.360634804 | 17.177801132 |
| C | 0.431946754  | 3.649635553 | 17.162073135 |
| C | 1.660765648  | 4.359278202 | 17.139247894 |
| C | 2.894905090  | 3.650331020 | 17.136259079 |
| C | 4.130067348  | 4.358620167 | 17.145540237 |
| C | 5.359201431  | 3.648856163 | 17.178661346 |
| C | 6.587565422  | 4.358732700 | 17.195228577 |
| C | 7.817328453  | 3.649540901 | 17.201562881 |
| C | 9.046190262  | 4.359685421 | 17.207740784 |
| C | 10.275307655 | 3.649758577 | 17.198236465 |
| C | 11.505183220 | 4.360393047 | 17.198713303 |
| C | -3.254273176 | 5.781358242 | 17.212909698 |
| C | -2.025816917 | 6.491322517 | 17.216327667 |
| C | -0.795645475 | 5.780676365 | 17.198663712 |
| C | 0.433159828  | 6.488632202 | 17.177604675 |
| C | 1.650390148  | 5.772910118 | 17.108133316 |
| C | 2.895493746  | 6.478786469 | 16.975383759 |
| C | 4.140810013  | 5.770941734 | 17.105289459 |
| C | 5.361271858  | 6.485129833 | 17.160614014 |
| C | 6.587540150  | 5.779382229 | 17.198345184 |
| C | 7.817946911  | 6.490981102 | 17.208522797 |
| C | 9.045933723  | 5.781274319 | 17.213979721 |
| C | 10.275585175 | 6.492066383 | 17.216741562 |
| C | -4.484953880 | 7.911627293 | 17.214292526 |

**Pts Isomer 9**

|   |              |              |              |
|---|--------------|--------------|--------------|
| C | 7.717581749  | 12.162853241 | 17.129205704 |
| C | 1.566659212  | 0.091021985  | 17.124479294 |
| C | -4.583013535 | 12.162282944 | 17.122838974 |
| C | 4.026581764  | 0.090966471  | 17.115690231 |
| C | -2.123983383 | 12.162816048 | 17.108860016 |
| C | 6.485949039  | 0.090623006  | 17.104694366 |
| C | 0.335762024  | 12.163864136 | 17.089702606 |
| C | 8.945704460  | 0.089476272  | 17.094379425 |
| C | 2.796798706  | 12.159754753 | 17.086723328 |
| C | 11.407429695 | 0.088982694  | 17.109491348 |
| C | 5.257656574  | 12.163051605 | 17.117044449 |
| C | 13.867562294 | 0.090308726  | 17.127149582 |
| C | 13.866068840 | 1.508658767  | 17.125986099 |
| C | 0.335487247  | 2.218559265  | 17.117076874 |
| C | 1.565749884  | 1.510179043  | 17.114170074 |
| C | 2.796683311  | 2.222952127  | 17.101623535 |
| C | 4.027647972  | 1.510571837  | 17.110183716 |
| C | 5.257427216  | 2.218648911  | 17.113245010 |
| C | 6.487509727  | 1.508880615  | 17.113067627 |
| C | 7.717238903  | 2.219052076  | 17.116485596 |
| C | 8.946746826  | 1.508617640  | 17.112142563 |
| C | 10.176638603 | 2.219616890  | 17.121852875 |
| C | 11.406482697 | 1.508584380  | 17.121780396 |
| C | 12.635614395 | 2.218760014  | 17.126602173 |
| C | 12.634567261 | 3.638391733  | 17.124753952 |
| C | -0.895626426 | 4.348678112  | 17.108343124 |
| C | 0.332917690  | 3.638050556  | 17.101039886 |
| C | 1.561661005  | 4.347737312  | 17.065002441 |
| C | 2.796387672  | 3.638139248  | 17.075601578 |
| C | 4.030452728  | 4.346372604  | 17.076471329 |
| C | 5.260076523  | 3.637275696  | 17.109874725 |
| C | 6.488185883  | 4.349458218  | 17.121074677 |
| C | 7.718263626  | 3.639292240  | 17.125274658 |
| C | 8.946456909  | 4.349469185  | 17.134441376 |

|    |              |              |              |
|----|--------------|--------------|--------------|
| C  | -3.255190134 | 8.622676849  | 17.216211319 |
| C  | -2.026863575 | 7.912684441  | 17.222183228 |
| C  | -0.797445297 | 8.623672485  | 17.217658997 |
| C  | 0.430451870  | 7.915990353  | 17.193748474 |
| C  | 1.645642281  | 8.634217262  | 17.139186859 |
| C  | 2.886901379  | 7.927420616  | 16.987476349 |
| C  | 4.138870716  | 8.631984711  | 17.077178955 |
| C  | 5.360572338  | 7.913749695  | 17.138082504 |
| C  | 6.586622238  | 8.622380257  | 17.169761658 |
| C  | 7.817235947  | 7.911391735  | 17.197517395 |
| C  | 9.045162201  | 8.622029305  | 17.201293945 |
| C  | -5.715060234 | 10.043530464 | 17.185520172 |
| C  | -4.485783577 | 10.754169464 | 17.188642502 |
| C  | -3.255835533 | 10.043643951 | 17.204471588 |
| C  | -2.027228832 | 10.753760338 | 17.202926636 |
| C  | -0.797436237 | 10.043967247 | 17.207387924 |
| C  | 0.430966377  | 10.755540848 | 17.197063446 |
| C  | 1.659179688  | 10.046765327 | 17.170984268 |
| C  | 2.894449711  | 10.754357338 | 17.145923615 |
| C  | 4.128268242  | 10.048080444 | 17.122266769 |
| C  | 5.357686043  | 10.755563736 | 17.143795013 |
| C  | 6.586331367  | 10.043731689 | 17.156324387 |
| C  | 7.815770626  | 10.753572464 | 17.166625977 |
| Pt | 3.011729717  | 7.325347900  | 14.905977249 |
| Pt | 3.534682274  | 8.462854385  | 12.638907433 |
| Pt | 1.143215656  | 8.526096344  | 13.408913612 |
| Pt | 1.196401119  | 6.005516529  | 13.547462463 |
| Pt | 3.564003706  | 5.939088821  | 12.698055267 |

|   |              |              |              |
|---|--------------|--------------|--------------|
| C | 10.176530838 | 3.638362885  | 17.131738663 |
| C | 11.405958176 | 4.348889351  | 17.131248474 |
| C | 11.405954361 | 5.770032406  | 17.131038666 |
| C | -2.126176357 | 6.480129719  | 17.113727570 |
| C | -0.896340847 | 5.768195152  | 17.096317291 |
| C | 0.331399202  | 6.475219250  | 17.047302246 |
| C | 1.550820351  | 5.759561539  | 17.004947662 |
| C | 2.796009302  | 6.468482971  | 16.883335114 |
| C | 4.041877747  | 5.760675907  | 17.027893066 |
| C | 5.260341644  | 6.477854729  | 17.095302582 |
| C | 6.488741875  | 5.769026279  | 17.130331039 |
| C | 7.717975616  | 6.480290890  | 17.141607285 |
| C | 8.946269035  | 5.769918442  | 17.141721725 |
| C | 10.176169395 | 6.481057644  | 17.139102936 |
| C | 10.176298141 | 7.900010586  | 17.137094498 |
| C | -3.354159832 | 8.611095428  | 17.122749329 |
| C | -2.126097918 | 7.900497437  | 17.105772018 |
| C | -0.896368027 | 8.612103462  | 17.074455261 |
| C | 0.330807209  | 7.902825832  | 17.029684067 |
| C | 1.551459789  | 8.620973587  | 16.980632782 |
| C | 2.799426079  | 7.913746834  | 16.896884918 |
| C | 4.042651176  | 8.621026993  | 17.023241043 |
| C | 5.261241436  | 7.903619289  | 17.091211319 |
| C | 6.488645077  | 8.612336159  | 17.125368118 |
| C | 7.718316078  | 7.901169300  | 17.139934540 |
| C | 8.946254730  | 8.611371994  | 17.140169144 |
| C | 8.946918488  | 10.031974792 | 17.135295868 |
| C | -4.583351612 | 10.743309975 | 17.128000259 |
| C | -3.353732109 | 10.032307625 | 17.118942261 |
| C | -2.125200748 | 10.742764473 | 17.103904724 |
| C | -0.895209789 | 10.032382965 | 17.079563141 |
| C | 0.333299160  | 10.744488716 | 17.067457199 |
| C | 1.562613487  | 10.036238670 | 17.030878067 |
| C | 2.797149181  | 10.743865967 | 17.054374695 |

|    |             |              |              |    |             |             |              |
|----|-------------|--------------|--------------|----|-------------|-------------|--------------|
| C  | 4.031509399 | 10.035414696 | 17.064922333 | Pt | 4.541263580 | 5.730216026 | 13.773754120 |
| C  | 5.259928226 | 10.744069099 | 17.106681824 | Pt | 2.892936230 | 6.974253654 | 12.305805206 |
| C  | 6.488665581 | 10.032222748 | 17.121915817 | Pt | 4.863016605 | 7.576768875 | 10.960653305 |
| C  | 7.718146801 | 10.742342949 | 17.131557465 | Pt | 2.811927795 | 7.251556396 | 14.806268692 |
| Pt | 6.378425121 | 6.169412613  | 12.270461082 |    |             |             |              |

**Table S6.** Cartesian coordinates of 7 isomers of Pt<sub>6</sub>, 6 isomers of which were previously reported [1]. Isomer 2 is missing due to the same structure with isomer 1 in [1], while a new isomer 8 is added.

### Pt<sub>6</sub> Isomer 1

|   |              |              |              |    |              |              |              |
|---|--------------|--------------|--------------|----|--------------|--------------|--------------|
| C | -6.898913383 | 12.162541389 | 17.285364151 | C  | 0.459092855  | 6.487608433  | 16.881858826 |
| C | 1.711371541  | 0.088303678  | 17.262121201 | C  | 1.698215723  | 5.753986359  | 16.824436188 |
| C | -4.438794613 | 12.161600113 | 17.243446350 | C  | 2.958275080  | 6.499007702  | 16.833126068 |
| C | 4.170933723  | 0.088135980  | 17.218212128 | C  | 4.194389343  | 5.766082287  | 16.902498245 |
| C | -1.979380131 | 12.162838936 | 17.204248428 | C  | 5.420396328  | 6.491455078  | 17.090137482 |
| C | 6.630289078  | 0.089873441  | 17.200767517 | C  | 6.636738300  | 5.774618149  | 17.145404816 |
| C | 0.480364799  | 12.164485931 | 17.202621460 | C  | 7.864932060  | 6.484073639  | 17.193538666 |
| C | 9.089681625  | 0.091329843  | 17.225610733 | C  | 9.090969086  | 5.771909714  | 17.193796158 |
| C | 2.939418316  | 12.164415359 | 17.246028900 | C  | 10.319182396 | 6.482191086  | 17.186408997 |
| C | 11.549939156 | 0.090619728  | 17.271757126 | C  | -4.439178467 | 7.902046204  | 17.193809509 |
| C | 5.399782181  | 12.162970543 | 17.288873672 | C  | -3.207246304 | 8.611496925  | 17.166538239 |
| C | 14.011014938 | 0.090189807  | 17.289592743 | C  | -1.982094049 | 7.903349876  | 17.105827332 |
| C | -0.749665976 | 1.510361671  | 17.263637543 | C  | -0.749677181 | 8.616496086  | 17.080226898 |
| C | 0.481141448  | 1.508554974  | 17.227163315 | C  | 0.476893902  | 7.919486046  | 16.996932983 |
| C | 1.711212873  | 2.528711815  | 17.231348038 | C  | 1.711577415  | 8.618980408  | 17.068431854 |
| C | 2.940813065  | 2.215761900  | 17.183032990 | C  | 2.946052551  | 7.920899391  | 17.034334183 |
| C | 4.170844078  | 1.507848978  | 17.191810608 | C  | 4.170692444  | 8.616933823  | 17.159854889 |
| C | 5.399887085  | 2.216388941  | 17.166633060 | C  | 5.406387806  | 7.903024673  | 17.172819138 |
| C | 6.629378319  | 1.509978414  | 17.189807892 | C  | 6.632969379  | 8.612496376  | 17.236429214 |
| C | 7.859178066  | 2.220649719  | 17.191120148 | C  | 7.863001823  | 7.902896404  | 17.222572327 |
| C | 9.088088036  | 1.512327433  | 17.220012665 | C  | 9.093011856  | 8.612389565  | 17.228347778 |
| C | 10.319091797 | 2.221436262  | 17.229478836 | C  | -5.668295860 | 10.032241821 | 17.251724243 |
| C | 11.549236298 | 1.511733890  | 17.256601334 | C  | -4.437619686 | 10.740998268 | 17.235601425 |
| C | 12.779606819 | 2.220402956  | 17.245822906 | C  | -3.208804846 | 10.032859802 | 17.194196701 |
| C | -1.982185721 | 3.640487671  | 17.193902969 | C  | -1.979056835 | 10.742826462 | 17.184587479 |
| C | -0.755487800 | 4.349679947  | 17.124120712 | C  | -0.749827385 | 10.036404610 | 17.145313263 |
| C | 0.482275724  | 3.636198759  | 17.143653870 | C  | 0.480501175  | 10.744800568 | 17.169544220 |
| C | 1.707716465  | 4.330564022  | 17.039257050 | C  | 1.710767746  | 10.036677361 | 17.160472870 |
| C | 2.940648794  | 3.633404016  | 17.091854095 | C  | 2.940004349  | 10.744219780 | 17.218477249 |
| C | 4.174653530  | 4.333480358  | 17.028549194 | C  | 4.170483589  | 10.033962250 | 17.232109070 |
| C | 5.398818493  | 3.637012720  | 17.110862732 | C  | 5.400856495  | 10.742613792 | 17.276741028 |
| C | 6.631751060  | 4.351681709  | 17.131359100 | C  | 6.631499290  | 10.032635689 | 17.273567200 |
| C | 7.857050896  | 3.642961979  | 17.172906876 | C  | 7.861820698  | 10.741495132 | 17.279403687 |
| C | 9.089397430  | 4.352222443  | 17.190940857 | Pt | 5.752182484  | 5.842380524  | 13.413640976 |
| C | 10.317434311 | 3.641492367  | 17.206977844 | Pt | 3.635602474  | 6.149019718  | 14.756200790 |
| C | 11.547703743 | 4.351154804  | 17.187736511 | Pt | 1.067544699  | 6.076689720  | 14.766685486 |
| C | -3.214803219 | 5.770270348  | 17.162233353 | Pt | 1.955837250  | 7.403719425  | 10.929788589 |
| C | -1.987895131 | 6.480840206  | 17.102333069 | Pt | 1.146271706  | 5.592498302  | 12.352581978 |
| C | -0.771053791 | 5.763808250  | 17.037429810 | Pt | 3.624668837  | 6.134196758  | 12.262310982 |

### Pt<sub>6</sub> Isomer 3

|   |              |              |              |   |              |             |              |
|---|--------------|--------------|--------------|---|--------------|-------------|--------------|
| C | -6.958950043 | 12.200829506 | 17.361490250 | C | 0.421923876  | 2.256784678 | 17.279102325 |
| C | 1.651405811  | 0.124496788  | 17.336303711 | C | 1.651892900  | 1.543840766 | 17.269550323 |
| C | -4.499289513 | 12.200244904 | 17.355140686 | C | 2.881119251  | 2.238994360 | 17.191749573 |
| C | 4.111675262  | 0.127685726  | 17.345031738 | C | 4.112061501  | 1.543678761 | 17.273832321 |
| C | -2.036702633 | 12.202177048 | 17.375532150 | C | 5.348896027  | 2.256671906 | 17.274991989 |
| C | 6.572657585  | 0.129105091  | 17.374677658 | C | 6.574818611  | 1.549977422 | 17.344228745 |
| C | 0.423463821  | 12.203581810 | 17.384435654 | C | 7.805611610  | 2.261229038 | 17.356485367 |
| C | 9.034220695  | 0.132081866  | 17.383428574 | C | 9.036199570  | 1.552272677 | 17.380195618 |
| C | 2.883903027  | 12.206633568 | 17.376319885 | C | 10.264112473 | 2.262583017 | 17.380525589 |
| C | 11.493808746 | 0.133192211  | 17.376472473 | C | 11.496260643 | 1.553873062 | 17.375865936 |
| C | 5.343919754  | 12.205907822 | 17.370346069 | C | 12.724163055 | 2.262905836 | 17.351846695 |
| C | 13.952784538 | 0.130074173  | 17.358720779 | C | -2.035319805 | 3.685549498 | 17.338109970 |
| C | -0.804783046 | 1.552025318  | 17.335197449 | C | -0.813188910 | 4.395155907 | 17.283107758 |

|   |              |             |              |
|---|--------------|-------------|--------------|
| C | 0.419775724  | 3.681098461 | 17.234115601 |
| C | 1.629852772  | 4.381032944 | 17.104858398 |
| C | 2.871894598  | 3.665277958 | 17.009784698 |
| C | 4.131287575  | 4.392040253 | 17.041740417 |
| C | 5.360766888  | 3.672224283 | 17.200597763 |
| C | 6.578914642  | 4.389095783 | 17.276260376 |
| C | 7.807929993  | 3.679251909 | 17.339931488 |
| C | 9.034709930  | 4.391702175 | 17.366041183 |
| C | 10.264865875 | 3.682861805 | 17.376621246 |
| C | 11.491874695 | 4.394376755 | 17.363979340 |
| C | -3.270251989 | 5.813078403 | 17.365591049 |
| C | -2.043531895 | 6.525432587 | 17.341264725 |
| C | -0.814514637 | 5.816910744 | 17.279594421 |
| C | 0.401797295  | 6.533706188 | 17.202407837 |
| C | 1.630267859  | 5.813946247 | 17.006742477 |
| C | 2.890900850  | 6.541137695 | 17.011161804 |
| C | 4.131633759  | 5.822819710 | 17.106575012 |
| C | 5.346000671  | 6.524353027 | 17.232030869 |
| C | 6.576086044  | 5.810435772 | 17.283781052 |
| C | 7.800724030  | 6.520766735 | 17.339294434 |
| C | 9.032512665  | 5.811383724 | 17.364206314 |
| C | 10.258953094 | 6.522228241 | 17.375980377 |
| C | -4.500740528 | 7.942361355 | 17.380310059 |
| C | -3.271840096 | 8.653041840 | 17.379768372 |
| C | -2.041121721 | 7.943898201 | 17.355834961 |
| C | -0.811517239 | 8.653830528 | 17.345630646 |

#### Pt<sub>6</sub> Isomer 4

|   |              |              |              |
|---|--------------|--------------|--------------|
| C | -6.962720394 | 12.222198486 | 17.179670334 |
| C | 1.646696210  | 0.150440499  | 17.207151413 |
| C | -4.505735397 | 12.225414276 | 17.274339676 |
| C | 4.104827881  | 0.154724032  | 17.297386169 |
| C | -2.044558525 | 12.227991104 | 17.316728592 |
| C | 6.564634323  | 0.156144172  | 17.297460556 |
| C | 0.412053585  | 12.232268333 | 17.241062164 |
| C | 9.031566620  | 0.155671850  | 17.166130066 |
| C | 2.875670433  | 12.238823891 | 17.049272537 |
| C | 11.486849785 | 0.156576157  | 17.062858582 |
| C | 5.339555264  | 12.224659920 | 17.084232330 |
| C | 13.945097923 | 0.149636030  | 17.114351273 |
| C | -0.813259006 | 1.572189808  | 17.092193604 |
| C | 0.418204308  | 2.280395269  | 17.099523544 |
| C | 1.647742271  | 1.570950866  | 17.162841797 |
| C | 2.875507355  | 2.280739069  | 17.207626343 |
| C | 4.106150150  | 1.571725130  | 17.277532578 |
| C | 5.339682579  | 2.280211926  | 17.303609848 |
| C | 6.567723274  | 1.575447202  | 17.302185059 |
| C | 7.801205635  | 2.283939123  | 17.280780792 |
| C | 9.031579971  | 1.574824572  | 17.208700180 |
| C | 10.259185791 | 2.284686565  | 17.163824081 |
| C | 11.488816261 | 1.575396657  | 17.101203918 |
| C | 12.720201492 | 2.283739567  | 17.091058731 |
| C | -2.038343906 | 3.706316233  | 17.106567383 |
| C | -0.812520266 | 4.413575649  | 17.072059631 |
| C | 0.420332909  | 3.699111700  | 17.056282043 |
| C | 1.651928902  | 4.399502277  | 17.045209885 |
| C | 2.875775576  | 3.699894905  | 17.167716980 |
| C | 4.114982605  | 4.405612946  | 17.250158310 |
| C | 5.342576981  | 3.699404240  | 17.307207108 |
| C | 6.571774960  | 4.410072327  | 17.330701828 |
| C | 7.802499771  | 3.700953245  | 17.306228638 |
| C | 9.032931328  | 4.412921429  | 17.280040741 |
| C | 10.260208130 | 3.705416441  | 17.206848145 |
| C | 11.489473343 | 4.416215897  | 17.172611237 |
| C | -3.272068024 | 5.833644867  | 17.218883514 |

|    |              |              |               |
|----|--------------|--------------|---------------|
| C  | 0.415979385  | 7.944985390  | 17.278827667  |
| C  | 1.652626514  | 8.659303665  | 17.276405334  |
| C  | 2.882050514  | 7.965191364  | 17.197721481  |
| C  | 4.111474991  | 8.660523415  | 17.273420334  |
| C  | 5.342445850  | 7.947786808  | 17.278158188  |
| C  | 6.568157673  | 8.652265549  | 17.334707260  |
| C  | 7.800044537  | 7.941482067  | 17.352239609  |
| C  | 9.028142929  | 8.650790215  | 17.376996994  |
| C  | -5.729775906 | 10.071754456 | 17.379362106  |
| C  | -4.500766754 | 10.779998779 | 17.380199432  |
| C  | -3.269939661 | 10.071784973 | 17.385318756  |
| C  | -2.038944721 | 10.782230377 | 17.385673523  |
| C  | -0.808906078 | 10.074227333 | 17.373851776  |
| C  | 0.421715260  | 10.784505844 | 17.373477936  |
| C  | 1.652883530  | 10.076117516 | 17.343423843  |
| C  | 2.882386684  | 10.786179543 | 17.351848602  |
| C  | 4.112146378  | 10.078832626 | 17.335010529  |
| C  | 5.342509270  | 10.785446167 | 17.359378815  |
| C  | 6.570296288  | 10.074163437 | 17.358934402  |
| C  | 7.799839973  | 10.781188011 | 17.372932434  |
| Pt | 0.892274380  | 7.917709351  | 13.662343979  |
| Pt | 2.270060539  | 6.197689533  | 14.910076141  |
| Pt | 3.542315722  | 3.979627848  | 14.922063828  |
| Pt | 4.148235321  | 5.482512951  | 11.1321114006 |
| Pt | 2.996769428  | 3.841826677  | 12.516126633  |
| Pt | 2.168228388  | 6.255748749  | 12.424794197  |

|    |              |              |              |
|----|--------------|--------------|--------------|
| C  | -2.043512344 | 6.546022892  | 17.191467285 |
| C  | -0.816189051 | 5.836968422  | 17.104356766 |
| C  | 0.403357983  | 6.553341866  | 17.057535172 |
| C  | 1.647879362  | 5.830428123  | 16.955001831 |
| C  | 2.900594950  | 6.527155399  | 17.090877533 |
| C  | 4.133776665  | 5.815374374  | 17.236026764 |
| C  | 5.349142075  | 6.537933350  | 17.303121567 |
| C  | 6.574297905  | 5.830917835  | 17.338066101 |
| C  | 7.803967476  | 6.543742180  | 17.335525513 |
| C  | 9.032320976  | 5.83265305   | 17.308252335 |
| C  | 10.259580612 | 6.543642998  | 17.285234451 |
| C  | -4.502241611 | 7.964282513  | 17.309553146 |
| C  | -3.274296284 | 8.676030159  | 17.304061890 |
| C  | -2.045324564 | 7.964395523  | 17.253692627 |
| C  | -0.818377972 | 8.674585342  | 17.232648849 |
| C  | 0.395380974  | 7.962530136  | 17.111824036 |
| C  | 1.633206844  | 8.683300972  | 16.989610672 |
| C  | 2.895493507  | 7.954452515  | 16.996248245 |
| C  | 4.132166862  | 8.675510406  | 17.133123398 |
| C  | 5.345323086  | 7.963618279  | 17.258895874 |
| C  | 6.572206974  | 8.673999786  | 17.277492523 |
| C  | 7.801519394  | 7.962449551  | 17.320390701 |
| C  | 9.029401779  | 8.674331665  | 17.315021515 |
| C  | -5.732586384 | 10.094886780 | 17.289011002 |
| C  | -4.505192757 | 10.805163383 | 17.302045822 |
| C  | -3.276734591 | 10.094669342 | 17.320186615 |
| C  | -2.047211170 | 10.807382584 | 17.318269730 |
| C  | -0.822309494 | 10.100181580 | 17.280124664 |
| C  | 0.393154144  | 10.822590828 | 17.221672058 |
| C  | 1.626697063  | 10.110226631 | 17.086320877 |
| C  | 2.880577564  | 10.807188988 | 16.960762024 |
| C  | 4.124540329  | 10.084413528 | 17.076160431 |
| C  | 5.343372345  | 10.801493645 | 17.124092102 |
| C  | 6.570376873  | 10.092426300 | 17.212062836 |
| C  | 7.798899651  | 10.804982185 | 17.230514526 |
| Pt | 3.557885170  | 8.102275848  | 12.962679863 |
| Pt | 2.549470186  | 6.854741096  | 15.028591156 |

Pt 1.854924440 6.159603119 12.691759109  
Pt 2.770592690 10.526034355 17.21619606

**Pt<sub>6</sub> Isomer 5**

C -6.996704102 12.209305763 17.226423264  
C 1.615077853 0.135967791 17.208873749  
C -4.533390522 12.207891464 17.219720840  
C 4.075233936 0.132812947 17.211629868  
C -2.074259281 12.207835197 17.229171753  
C 6.534943104 0.136624679 17.231182098  
C 0.383460522 12.212352753 17.236572266  
C 8.993332863 0.139991522 17.239341736  
C 2.843470573 12.213859558 17.233783722  
C 11.452459335 0.138555914 17.234842300  
C 5.303442001 12.210139275 17.233026505  
C 13.914561272 0.135681003 17.225229263  
C -0.847995460 1.556530356 17.199781418  
C 0.378732443 2.262868166 17.147771835  
C 1.613866091 1.550807834 17.157995224  
C 2.846531391 2.254485846 17.112396240  
C 4.075839520 1.553233862 17.169244766  
C 5.305140495 2.263942719 17.178947449  
C 6.533814430 1.557853699 17.217178345  
C 7.762742996 2.268310547 17.223464966  
C 8.991820335 1.559363246 17.237405777  
C 10.222980499 2.268538237 17.232439041  
C 11.450942039 1.558926225 17.229330063  
C 12.681398392 2.267808914 17.205831528  
C -2.080833912 3.685803175 17.189168930  
C -0.851757288 4.396154881 17.136934280  
C 0.369117498 3.680002928 17.080299377  
C 1.601027966 4.398746014 16.946002960  
C 2.854877472 3.676531315 16.990709305  
C 4.088722229 4.384257793 17.030920029  
C 5.306843281 3.685062885 17.136383057  
C 6.538753033 4.398374557 17.163799286  
C 7.762031078 3.690485001 17.207317352  
C 8.994461060 4.400279045 17.220523834  
C 10.221953392 3.689329624 17.226253510  
C 11.451488495 4.398007870 17.212444305  
C -3.306531429 5.817874908 17.211311340  
C -2.074686289 6.527350426 17.192869186  
C -0.849832296 5.816571712 17.149049759

**Pt<sub>6</sub> Isomer 6**

C -6.932883739 12.159041405 17.224227905  
C 1.677883387 0.086125612 17.224042892  
C -4.471404552 12.157814980 17.221149445  
C 4.137733459 0.084133215 17.216972351  
C -2.011752605 12.157466888 17.213060379  
C 6.598046780 0.085330628 17.210905075  
C 0.447326183 12.160015106 17.209239960  
C 9.057153702 0.087862380 17.211971283  
C 2.907634735 12.161201477 17.213489532  
C 11.516760826 0.087572925 17.219085693  
C 5.367535591 12.159225464 17.221359253  
C 13.978158951 0.086379714 17.224092484  
C -0.782204151 1.507126331 17.217376709  
C 0.446860909 2.215888739 17.210214615  
C 1.677276850 1.504791260 17.216690063  
C 2.908177614 2.214003086 17.204095840  
C 4.138012409 1.504366398 17.208139420  
C 5.368076324 2.212743998 17.197671890  
C 6.598570824 1.505245566 17.204648972  
C 7.826637268 2.216553450 17.197935104

Pt 2.015945435 9.797179222 15.028691292  
Pt 1.062176704 8.580718994 12.920959473

C 0.381565094 6.530405045 17.112419128  
C 1.594803810 5.829174042 17.006952286  
C 2.834291458 6.544888020 16.882059097  
C 4.093077660 5.814345837 16.889316559  
C 5.323847294 6.533591270 17.071567535  
C 6.540097237 5.820951939 17.152746201  
C 7.769083500 6.531075478 17.199251175  
C 8.996358871 5.818897247 17.219240189  
C 10.226983070 6.528573513 17.223335266  
C -4.532608032 7.948918343 17.227943420  
C -3.302155495 8.657423019 17.227067947  
C -2.074093103 7.947770596 17.206476212  
C -0.842051029 8.659014702 17.193832397  
C 0.382887363 7.954521179 17.146430969  
C 1.613681316 8.666703224 17.140985489  
C 2.840945721 7.970775604 17.064174652  
C 4.070739746 8.666934013 17.122085571  
C 5.311609745 7.949856758 17.116926193  
C 6.540278912 8.661100388 17.186651230  
C 7.768393040 7.949648857 17.202808380  
C 8.998636246 8.659923553 17.225799561  
C -5.763376236 10.078138351 17.231775284  
C -4.532460690 10.787334442 17.233270645  
C -3.303872108 10.078738213 17.232475281  
C -2.073480606 10.788633347 17.231262207  
C -0.843802452 10.081111908 17.218517303  
C 0.383888245 10.791902542 17.222820282  
C 1.614041805 10.085223198 17.198211670  
C 2.843816757 10.793191910 17.209991455  
C 4.072944641 10.085276604 17.194488525  
C 5.304851532 10.792428970 17.220218658  
C 6.536327362 10.082147598 17.216064453  
C 7.765523434 10.789266586 17.230648041  
Pt 4.916722298 8.155345917 14.236869812  
Pt 3.455636263 6.178539753 14.760979652  
Pt 2.103474140 4.054264545 14.733062744  
Pt 3.313233614 5.738398552 10.346888542  
Pt 2.330660820 5.094400883 12.522174835  
Pt 4.198203564 6.889528751 12.307855606

C 9.056609154 1.507625341 17.207311630  
C 10.287313461 2.217334986 17.206171036  
C 11.516366005 1.507926702 17.213836670  
C 12.746871948 2.217605352 17.210351944  
C -2.013723135 3.636504650 17.196481705  
C -0.783722997 4.346802711 17.182628632  
C 0.446157217 3.636790991 17.186544418  
C 1.673880339 4.346601009 17.152746201  
C 2.909771681 3.631578445 17.165662766  
C 4.139096260 4.328884125 17.120357513  
C 5.368332386 3.631549120 17.163787842  
C 6.599172592 4.346124649 17.157136917  
C 7.825351715 3.638522863 17.181228638  
C 9.057668686 4.348381996 17.186676025  
C 10.286691666 3.637955904 17.196666718  
C 11.516583443 4.347435474 17.194297791  
C -3.243256569 5.767565250 17.190313339  
C -2.013651371 6.477926731 17.183069229  
C -0.785248280 5.766461372 17.171619415  
C 0.443380117 6.476409912 17.140895844

|   |              |             |              |
|---|--------------|-------------|--------------|
| C | 1.663783312  | 5.760999203 | 17.099416733 |
| C | 2.898697376  | 6.485822201 | 16.994132996 |
| C | 4.146901131  | 5.759096622 | 16.996026993 |
| C | 5.382217407  | 6.484449387 | 17.102714539 |
| C | 6.602224827  | 5.768975258 | 17.146156311 |
| C | 7.830718040  | 6.478985786 | 17.174667358 |
| C | 9.059251785  | 5.767479897 | 17.185464859 |
| C | 10.288609505 | 6.477808952 | 17.191228867 |
| C | -4.471199036 | 7.897994995 | 17.195781708 |
| C | -3.241307259 | 8.607457161 | 17.197174072 |
| C | -2.012184143 | 7.896994114 | 17.184366226 |
| C | -0.780100822 | 8.606886864 | 17.176481247 |
| C | 0.446249485  | 7.899171352 | 17.149688721 |
| C | 1.677184105  | 8.613704681 | 17.153573990 |
| C | 2.906410694  | 7.916024685 | 17.110748291 |
| C | 4.135640144  | 8.613828659 | 17.157091141 |
| C | 5.371649265  | 7.898743153 | 17.149738312 |
| C | 6.599301815  | 8.608692169 | 17.184452057 |
| C | 7.829052925  | 7.898581982 | 17.183607101 |

**Pt<sub>6</sub> Isomer 7**

|   |              |              |              |
|---|--------------|--------------|--------------|
| C | -6.989686012 | 12.147485733 | 17.329433441 |
| C | 1.620342612  | 0.075735122  | 17.320158005 |
| C | -4.529664040 | 12.148163795 | 17.316036224 |
| C | 4.080442905  | 0.076222934  | 17.315401077 |
| C | -2.069362164 | 12.148151398 | 17.313875198 |
| C | 6.540674686  | 0.075749926  | 17.317064285 |
| C | 0.390787601  | 12.147459984 | 17.324821472 |
| C | 9.000829697  | 0.074949458  | 17.325012207 |
| C | 2.850555897  | 12.146291733 | 17.342281342 |
| C | 11.460443497 | 0.074610174  | 17.331602097 |
| C | 5.310482502  | 12.146357536 | 17.345426559 |
| C | 13.920201302 | 0.074945264  | 17.328659058 |
| C | -0.839340210 | 1.495704889  | 17.318492889 |
| C | 0.390809536  | 2.206520796  | 17.325809479 |
| C | 1.620853901  | 1.496376395  | 17.326028824 |
| C | 2.850625992  | 2.207268000  | 17.338642120 |
| C | 4.080469608  | 1.496725440  | 17.328859329 |
| C | 5.310315609  | 2.207349539  | 17.338432312 |
| C | 6.540135860  | 1.496470213  | 17.324497223 |
| C | 7.770092487  | 2.206706524  | 17.324798584 |
| C | 9.000247955  | 1.495753050  | 17.316669464 |
| C | 10.230228424 | 2.205898285  | 17.312664032 |
| C | 11.460391998 | 1.495106101  | 17.314426422 |
| C | 12.690578461 | 2.205833673  | 17.313278198 |
| C | -2.069071054 | 3.626631975  | 17.314222336 |
| C | -0.838871002 | 4.336904526  | 17.329828262 |
| C | 0.391721249  | 3.627131939  | 17.340734482 |
| C | 1.621342897  | 4.337300777  | 17.372358322 |
| C | 2.850998402  | 3.627413273  | 17.368345261 |
| C | 4.080416203  | 4.337502003  | 17.390352249 |
| C | 5.309998512  | 3.627538204  | 17.369493484 |
| C | 6.539505005  | 4.337533951  | 17.375261307 |
| C | 7.769078255  | 3.627287149  | 17.341993332 |
| C | 8.999630928  | 4.336975574  | 17.331842422 |
| C | 10.229781151 | 3.626667738  | 17.314685822 |
| C | 11.460352898 | 4.336733818  | 17.313669205 |
| C | -3.299589396 | 5.757060051  | 17.319196701 |
| C | -2.068989038 | 6.467005730  | 17.326675415 |
| C | -0.838266134 | 5.757515430  | 17.341392517 |

**Pt<sub>6</sub> Isomer 8**

|   |              |              |              |
|---|--------------|--------------|--------------|
| C | 7.739838123  | 12.136078835 | 17.276336670 |
| C | 1.588313699  | 0.062754683  | 17.309112549 |
| C | -4.560579777 | 12.136561394 | 17.317085266 |

|    |              |              |              |
|----|--------------|--------------|--------------|
| C  | 9.059214592  | 8.608861923  | 17.197994232 |
| C  | -5.701435566 | 10.027733803 | 17.210838318 |
| C  | -4.471014977 | 10.737441063 | 17.215541840 |
| C  | -3.241930246 | 10.028028488 | 17.206195831 |
| C  | -2.011190891 | 10.737707138 | 17.206474304 |
| C  | -0.781319618 | 10.028868675 | 17.193737030 |
| C  | 0.446902752  | 10.740133286 | 17.199771881 |
| C  | 1.677388668  | 10.032546043 | 17.189472198 |
| C  | 2.907347679  | 10.741015434 | 17.201133728 |
| C  | 4.137113571  | 10.031324387 | 17.196651459 |
| C  | 5.368109703  | 10.740585327 | 17.212070465 |
| C  | 6.598553181  | 10.029596329 | 17.206937790 |
| C  | 7.827507019  | 10.738304138 | 17.216506958 |
| Pt | 5.311686039  | 7.742098331  | 10.572776794 |
| Pt | 4.460507870  | 7.032915592  | 12.770470619 |
| Pt | 3.539384127  | 6.108448982  | 14.854463577 |
| Pt | 2.010613918  | 4.191075802  | 10.597142220 |
| Pt | 2.725681543  | 5.057594776  | 12.786932945 |
| Pt | 3.665522337  | 5.962029934  | 10.467031479 |

|    |              |              |              |
|----|--------------|--------------|--------------|
| C  | 0.391524315  | 6.467340469  | 17.373064041 |
| C  | 1.622136593  | 5.757769585  | 17.395975113 |
| C  | 2.851010084  | 6.467293739  | 17.432861328 |
| C  | 4.080484390  | 5.757985115  | 17.427122116 |
| C  | 5.310081959  | 6.467378616  | 17.436296463 |
| C  | 6.538830757  | 5.757829666  | 17.401645660 |
| C  | 7.769363403  | 6.467464447  | 17.379863739 |
| C  | 8.999100685  | 5.757610321  | 17.345832825 |
| C  | 10.229799271 | 6.467030048  | 17.329332352 |
| C  | -4.530069828 | 7.887336254  | 17.330047607 |
| C  | -3.299502373 | 8.597223228  | 17.320816040 |
| C  | -2.068946362 | 7.887316227  | 17.326940536 |
| C  | -0.838433743 | 8.596894264  | 17.339698792 |
| C  | 0.391592026  | 7.887151718  | 17.369573593 |
| C  | 1.621228695  | 8.596814156  | 17.391525269 |
| C  | 2.851440907  | 7.886639118  | 17.428037643 |
| C  | 4.080616951  | 8.596817017  | 17.436683655 |
| C  | 5.309710026  | 7.886751175  | 17.432748795 |
| C  | 6.539823532  | 8.596935272  | 17.398767471 |
| C  | 7.769469738  | 7.887170792  | 17.377742767 |
| C  | 8.999408722  | 8.596917152  | 17.345968246 |
| C  | -5.760129452 | 10.017301559 | 17.335296631 |
| C  | -4.529924393 | 10.727564812 | 17.318634033 |
| C  | -3.299500704 | 10.017484665 | 17.316381454 |
| C  | -2.069061756 | 10.727484703 | 17.315765381 |
| C  | -0.838833809 | 10.017244339 | 17.329589844 |
| C  | 0.391507626  | 10.727019310 | 17.339155197 |
| C  | 1.621227741  | 10.016669273 | 17.370563507 |
| C  | 2.850844383  | 10.726370811 | 17.375970840 |
| C  | 4.080529690  | 10.015676498 | 17.402309418 |
| C  | 5.310319424  | 10.726446152 | 17.379848480 |
| C  | 6.539920807  | 10.016768456 | 17.377532959 |
| C  | 7.769551277  | 10.727083206 | 17.345600128 |
| Pt | 6.606214046  | 5.860049725  | 13.981509209 |
| Pt | 5.502315998  | 8.035037994  | 13.993450165 |
| Pt | 4.168986797  | 10.077918053 | 13.975888252 |
| Pt | 1.736797094  | 5.857966423  | 13.990930557 |
| Pt | 2.838595867  | 8.034061432  | 13.998373032 |
| Pt | 4.171859741  | 5.727045536  | 14.000836372 |

|   |              |              |              |
|---|--------------|--------------|--------------|
| C | 4.048466206  | 0.064856835  | 17.328807831 |
| C | -2.101622581 | 12.138118744 | 17.307079315 |
| C | 6.509539127  | 0.065714203  | 17.305986404 |



|   |              |              |              |    |              |              |              |
|---|--------------|--------------|--------------|----|--------------|--------------|--------------|
| C | 0.354932785  | 12.142524719 | 17.238006592 | C  | 4.052937508  | 5.737418175  | 17.238594055 |
| C | 8.971419334  | 0.073792681  | 17.235372543 | C  | 5.289306641  | 6.451220036  | 17.235284805 |
| C | 2.821932316  | 12.160056114 | 17.143056870 | C  | 6.514680862  | 5.745507240  | 17.302238464 |
| C | 11.432377815 | 0.074243478  | 17.206054688 | C  | 7.745916843  | 6.455563068  | 17.302043915 |
| C | 5.282176495  | 12.143309593 | 17.203273773 | C  | 8.975829124  | 5.746293545  | 17.327255249 |
| C | 13.889277458 | 0.065214075  | 17.259361267 | C  | 10.204847336 | 6.457103252  | 17.318407059 |
| C | 13.890703201 | 1.486321807  | 17.287693024 | C  | 10.204820633 | 7.877023697  | 17.306982040 |
| C | 0.360353112  | 2.193247557  | 17.305198669 | C  | -3.328111649 | 8.588499069  | 17.293857574 |
| C | 1.590108514  | 1.483294725  | 17.316225052 | C  | -2.096579075 | 7.879148960  | 17.269792557 |
| C | 2.820188522  | 2.192356586  | 17.328344345 | C  | -0.872944832 | 8.589718819  | 17.216073990 |
| C | 4.049706936  | 1.483853102  | 17.340980530 | C  | 0.357090473  | 7.873745441  | 17.169782639 |
| C | 5.281072617  | 2.194783449  | 17.349597931 | C  | 1.571119785  | 8.574621201  | 17.055807114 |
| C | 6.511271477  | 1.487128019  | 17.340223312 | C  | 2.811726093  | 7.857571125  | 16.982978821 |
| C | 7.741054535  | 2.197104931  | 17.339437485 | C  | 4.073161125  | 8.585693359  | 16.977422714 |
| C | 8.972853661  | 1.487819791  | 17.303316116 | C  | 5.301550388  | 7.865146637  | 17.143390656 |
| C | 10.203431129 | 2.199075937  | 17.303588867 | C  | 6.520164013  | 8.582296371  | 17.205598831 |
| C | 11.432534218 | 1.492385030  | 17.273849487 | C  | 7.748370171  | 7.873337746  | 17.272657394 |
| C | 12.663279533 | 2.198156595  | 17.293359756 | C  | 8.975011826  | 8.586225510  | 17.293048859 |
| C | 12.663953781 | 3.617794514  | 17.307241440 | C  | 8.972295761  | 10.005163193 | 17.288448334 |
| C | -0.866378546 | 4.324732780  | 17.293521881 | C  | -4.560722828 | 10.716658592 | 17.306465149 |
| C | 0.361177444  | 3.612958908  | 17.296977997 | C  | -3.330830812 | 10.007490158 | 17.297927856 |
| C | 1.591875792  | 4.318781376  | 17.280014038 | C  | -2.104157448 | 10.720414162 | 17.280412674 |
| C | 2.820890427  | 3.612138748  | 17.306783676 | C  | -0.875964165 | 10.011440277 | 17.216182709 |
| C | 4.051443100  | 4.323335648  | 17.306138992 | C  | 0.342484474  | 10.728525162 | 17.150354385 |
| C | 5.283271790  | 3.614022493  | 17.340045929 | C  | 1.570375443  | 10.007596016 | 16.981420517 |
| C | 6.513037682  | 4.324078083  | 17.338844299 | C  | 2.831655025  | 10.736023903 | 16.975824356 |
| C | 7.743299484  | 3.616348982  | 17.348344803 | C  | 4.072830677  | 10.019031525 | 17.044960022 |
| C | 8.974683762  | 4.327271938  | 17.340255737 | C  | 5.287328720  | 10.720133781 | 17.155401230 |
| C | 10.204175949 | 3.618829727  | 17.328226089 | C  | 6.517221928  | 10.004040718 | 17.203422546 |
| C | 11.434261322 | 4.327796936  | 17.318979263 | C  | 7.740900993  | 10.714565277 | 17.259889603 |
| C | 11.436012268 | 5.748390675  | 17.314073563 | Pt | 2.158023357  | 10.423393250 | 14.883765221 |
| C | -2.095517397 | 6.457656384  | 17.285503387 | Pt | 3.237314701  | 11.004265785 | 12.621881485 |
| C | -0.864976406 | 5.745975018  | 17.269886017 | Pt | 1.041333199  | 9.734814644  | 12.668757439 |
| C | 0.362234116  | 6.450488567  | 17.216417313 | Pt | 3.465749264  | 8.159995079  | 14.884352684 |
| C | 1.591924191  | 5.736967564  | 17.216642380 | Pt | 4.505011082  | 8.811964035  | 12.623620033 |
| C | 2.822138786  | 6.433709145  | 17.151428223 | Pt | 2.308772087  | 7.542638302  | 12.670230865 |

**Table S7.** Cartesian coordinates of 8 isomers of Pt<sub>8</sub>.

**Pt<sub>8</sub> Isomer 1**

|   |              |              |              |   |              |             |              |
|---|--------------|--------------|--------------|---|--------------|-------------|--------------|
| C | 7.905653954  | 11.763402939 | 17.262054443 | C | 12.824709892 | 3.240888834 | 17.297803879 |
| C | -5.624683857 | 12.472827911 | 17.268400192 | C | -0.706339478 | 3.948021650 | 17.275184631 |
| C | -4.395562172 | 11.763387680 | 17.228466034 | C | 0.522140980  | 3.238684177 | 17.285470963 |
| C | -3.166542530 | 12.472938538 | 17.223266602 | C | 1.753727198  | 3.946830273 | 17.247047424 |
| C | -1.937468052 | 11.764334679 | 17.169448853 | C | 2.984613419  | 3.238642693 | 17.254875183 |
| C | -0.707732677 | 12.475672722 | 17.184570313 | C | 4.214886665  | 3.945983410 | 17.217781067 |
| C | 0.517966747  | 11.770641327 | 17.121185303 | C | 5.445893764  | 3.239404678 | 17.235599518 |
| C | 1.754091740  | 12.480054855 | 17.186931610 | C | 6.675828934  | 3.949799538 | 17.220279694 |
| C | 2.984517097  | 11.784037590 | 17.158061981 | C | 7.905548096  | 3.241635323 | 17.251441956 |
| C | 4.213007927  | 12.477264404 | 17.256977081 | C | 9.136734009  | 3.950415134 | 17.250673294 |
| C | 5.445624352  | 11.760569572 | 17.253068924 | C | 10.365144730 | 3.242918491 | 17.279817581 |
| C | 6.672929287  | 12.470135689 | 17.282592773 | C | 11.594880104 | 3.951335430 | 17.274564743 |
| C | 14.053072929 | 1.109814405  | 17.308774948 | C | 11.594950676 | 5.371407986 | 17.224824905 |
| C | 0.522955537  | 1.818644047  | 17.304450989 | C | -1.937105894 | 6.081298351 | 17.184101105 |
| C | 1.754566431  | 1.109679580  | 17.289264679 | C | -0.707617998 | 5.368998051 | 17.210746765 |
| C | 2.984502792  | 1.818368316  | 17.275293350 | C | 0.514847279  | 6.072970867 | 17.136175156 |
| C | 4.213845730  | 1.109987855  | 17.254888535 | C | 1.754022837  | 5.362630844 | 17.163330078 |
| C | 5.444702148  | 1.819993019  | 17.250654221 | C | 2.985388994  | 6.060348988 | 17.083417892 |
| C | 6.673780918  | 1.113027930  | 17.238922119 | C | 4.216690540  | 5.363814354 | 17.136451721 |
| C | 7.903321743  | 1.822695136  | 17.255964279 | C | 5.449172974  | 6.067783833 | 17.082294464 |
| C | 9.134356499  | 1.113751292  | 17.256265640 | C | 6.676870823  | 5.368581295 | 17.155509949 |
| C | 10.364406586 | 1.821736217  | 17.286184311 | C | 7.912783146  | 6.077183723 | 17.155427933 |
| C | 11.593848228 | 1.112812281  | 17.298656464 | C | 9.137152672  | 5.370687962 | 17.208377838 |
| C | 12.825224876 | 1.820929527  | 17.313951492 | C | 10.367573738 | 6.080833912 | 17.197496414 |

|   |              |              |              |
|---|--------------|--------------|--------------|
| C | 10.369298935 | 7.500759602  | 17.166902542 |
| C | -3.165399790 | 8.212806702  | 17.142856598 |
| C | -1.938267231 | 7.500441074  | 17.120639801 |
| C | -0.715246677 | 8.211662292  | 17.035558701 |
| C | 0.501553059  | 7.488539696  | 16.996139526 |
| C | 1.737416267  | 8.199213028  | 16.848056793 |
| C | 2.990625381  | 7.491535187  | 16.932060242 |
| C | 4.216231823  | 8.224356651  | 17.064102173 |
| C | 5.449143410  | 7.501106262  | 16.965982437 |
| C | 6.695278645  | 8.218426704  | 17.043260574 |
| C | 7.921392918  | 7.496634007  | 17.108928680 |
| C | 9.143696785  | 8.212409973  | 17.153081894 |
| C | 9.139503479  | 9.632473946  | 17.182237625 |
| C | -4.393990517 | 10.342882156 | 17.189207077 |
| C | -3.165975571 | 9.632930756  | 17.145486832 |
| C | -1.937905788 | 10.345297813 | 17.116935730 |

### Pt8 Isomer 2

|   |              |              |              |
|---|--------------|--------------|--------------|
| C | -6.901262283 | 12.160610199 | 17.127841949 |
| C | 1.706480026  | 0.084419169  | 17.114253998 |
| C | -4.440203190 | 12.157853127 | 17.057798386 |
| C | 4.170634747  | 0.084888071  | 17.082155228 |
| C | -1.980156898 | 12.160064697 | 17.074598312 |
| C | 6.632540226  | 0.090977699  | 17.158700943 |
| C | 0.485946655  | 12.176072121 | 17.256145477 |
| C | 9.089553833  | 0.097803675  | 17.395843506 |
| C | 2.933074474  | 12.168111801 | 17.496990204 |
| C | 11.549427032 | 0.095968172  | 17.399469376 |
| C | 5.398174763  | 12.177103996 | 17.272403717 |
| C | 14.008733749 | 0.092153981  | 17.215774536 |
| C | -0.752354324 | 1.508828163  | 17.259172440 |
| C | 0.478799343  | 2.214263201  | 17.238405228 |
| C | 1.707199574  | 1.502651691  | 17.180135727 |
| C | 2.939446449  | 2.208498955  | 17.181573868 |
| C | 4.171263695  | 1.503357649  | 17.136020660 |
| C | 5.400516510  | 2.214961052  | 17.151355743 |
| C | 6.631985188  | 1.507250905  | 17.179347992 |
| C | 7.862586498  | 2.219778776  | 17.230474472 |
| C | 9.089472771  | 1.516657710  | 17.328336716 |
| C | 10.319133759 | 2.226069212  | 17.330379486 |
| C | 11.549045563 | 1.514143348  | 17.355731964 |
| C | 12.777901649 | 2.218076229  | 17.299640656 |
| C | -1.982778668 | 3.638398170  | 17.264495850 |
| C | -0.756671906 | 4.343794823  | 17.252681732 |
| C | 0.477340221  | 3.630848885  | 17.263168335 |
| C | 1.709250212  | 4.328104019  | 17.259429932 |
| C | 2.940483332  | 3.623618603  | 17.227193832 |
| C | 4.170011044  | 4.330632687  | 17.187173843 |
| C | 5.400527954  | 3.634397984  | 17.153436661 |
| C | 6.635922432  | 4.348938465  | 17.132251740 |
| C | 7.862713814  | 3.639680624  | 17.177961349 |
| C | 9.091640472  | 4.350028515  | 17.174186707 |
| C | 10.319816589 | 3.640372038  | 17.242263794 |
| C | 11.548792839 | 4.349353313  | 17.220367432 |
| C | -3.211029291 | 5.766453743  | 17.145202637 |
| C | -1.981724262 | 6.473612785  | 17.143791199 |
| C | -0.763827801 | 5.758979797  | 17.193983078 |
| C | 0.472801924  | 6.484577656  | 17.214328766 |

### Pt8 Isomer 3

|   |              |              |              |
|---|--------------|--------------|--------------|
| C | -6.937325478 | 12.233550072 | 17.306680679 |
| C | 1.671659231  | 0.159444839  | 17.250406265 |
| C | -4.472283840 | 12.232729912 | 17.278604507 |
| C | 4.143110752  | 0.155223906  | 17.239070892 |
| C | -2.008794785 | 12.231249809 | 17.297630310 |

|    |              |              |              |
|----|--------------|--------------|--------------|
| C  | -0.711560249 | 9.637115479  | 17.030851364 |
| C  | 0.506268978  | 10.360421181 | 16.983802795 |
| C  | 1.744303703  | 9.658349991  | 16.830549240 |
| C  | 2.997103214  | 10.360416412 | 16.969226837 |
| C  | 4.225925922  | 9.622376442  | 17.126199722 |
| C  | 5.451456547  | 10.342085838 | 17.199739456 |
| C  | 6.683502197  | 9.642143250  | 17.161415100 |
| C  | 7.910097599  | 10.345745087 | 17.210094452 |
| Pt | 1.750463963  | 7.351687908  | 12.306567192 |
| Pt | 2.193674564  | 7.553250790  | 14.812906265 |
| Pt | 4.978803635  | 9.855025291  | 13.720640182 |
| Pt | 3.550130367  | 11.904497147 | 13.201208115 |
| Pt | 2.649536133  | 9.698689461  | 12.294360161 |
| Pt | 6.024699688  | 7.864746094  | 14.818216324 |
| Pt | 4.181490898  | 7.413561821  | 13.152194023 |
| Pt | 2.564033985  | 10.092700005 | 14.773199081 |

|    |              |              |              |
|----|--------------|--------------|--------------|
| C  | 1.715927124  | 5.765850544  | 17.285919189 |
| C  | 2.945834637  | 6.493688107  | 17.454517365 |
| C  | 4.161894321  | 5.770670891  | 17.202323914 |
| C  | 5.404036522  | 6.487613678  | 17.090501785 |
| C  | 6.642644882  | 5.762778282  | 17.079641342 |
| C  | 7.863688469  | 6.476776600  | 17.072927475 |
| C  | 9.093584061  | 5.768245697  | 17.104043961 |
| C  | 10.322664261 | 6.478863239  | 17.085067749 |
| C  | -4.433186531 | 7.898138523  | 17.019716263 |
| C  | -3.201334476 | 8.606798172  | 17.010210037 |
| C  | -1.971188307 | 7.896549702  | 17.085533142 |
| C  | -0.741999626 | 8.602175713  | 17.157314301 |
| C  | 0.480464935  | 7.912578583  | 17.354021072 |
| C  | 1.703786373  | 8.604927063  | 17.573297501 |
| C  | 2.946259499  | 7.892107010  | 17.599306107 |
| C  | 4.181665421  | 8.594322205  | 17.479402542 |
| C  | 5.399028778  | 7.911896229  | 17.254821777 |
| C  | 6.633197784  | 8.614548683  | 17.142227173 |
| C  | 7.861470222  | 7.900962830  | 17.060806274 |
| C  | 9.091250420  | 8.608395576  | 17.017608643 |
| C  | -5.667796612 | 10.029466629 | 17.027252197 |
| C  | -4.437557697 | 10.740722656 | 17.013925552 |
| C  | -3.203167439 | 10.032032013 | 16.993556976 |
| C  | -1.981193066 | 10.745742798 | 17.012311935 |
| C  | -0.738976479 | 10.028350830 | 17.034168243 |
| C  | 0.505429268  | 10.738368034 | 17.221717834 |
| C  | 1.715246677  | 10.020718575 | 17.547758102 |
| C  | 2.928602219  | 10.749220848 | 17.569786072 |
| C  | 4.161153316  | 10.023756981 | 17.380100250 |
| C  | 5.398583889  | 10.743083000 | 17.178794861 |
| C  | 6.640476704  | 10.026124001 | 17.127395630 |
| C  | 7.862474918  | 10.739109039 | 17.082771301 |
| Pt | 4.226357460  | 6.205954075  | 15.062531471 |
| Pt | 3.843618870  | 8.469510078  | 13.942218781 |
| Pt | 2.482693195  | 10.654073715 | 13.344900131 |
| Pt | 1.410006046  | 6.109179974  | 15.161608696 |
| Pt | 1.344677925  | 8.340484619  | 13.931997299 |
| Pt | 2.738172770  | 6.332642555  | 12.946063995 |
| Pt | 0.598013401  | 10.462379456 | 15.093779564 |
| Pt | 4.222367287  | 10.598165512 | 15.227884293 |

|   |              |              |              |
|---|--------------|--------------|--------------|
| C | 6.600300312  | 0.157560140  | 17.282852173 |
| C | 0.450201988  | 12.233049393 | 17.317584991 |
| C | 9.057706833  | 0.161680788  | 17.312032700 |
| C | 2.906597137  | 12.235670090 | 17.320203781 |
| C | 11.516809464 | 0.162912846  | 17.318189621 |

|   |              |              |              |
|---|--------------|--------------|--------------|
| C | 5.364392281  | 12.235986710 | 17.320510864 |
| C | 13.975098610 | 0.162912652  | 17.298067093 |
| C | -0.786090136 | 1.581904531  | 17.257888794 |
| C | 0.441227198  | 2.289849281  | 17.159065247 |
| C | 1.659696102  | 1.566229820  | 17.124950409 |
| C | 2.905326128  | 2.259592295  | 16.920198441 |
| C | 4.158681870  | 1.562446833  | 17.093246460 |
| C | 5.377826691  | 2.267184019  | 17.081659317 |
| C | 6.602070808  | 1.575135708  | 17.208631516 |
| C | 7.832959652  | 2.290628672  | 17.229835510 |
| C | 9.056957245  | 1.583661318  | 17.288467407 |
| C | 10.288811684 | 2.294576645  | 17.301431656 |
| C | 11.516908646 | 1.584098339  | 17.308307648 |
| C | 12.745730400 | 2.293454409  | 17.280345917 |
| C | -2.013492346 | 3.714377403  | 17.270168304 |
| C | -0.786451817 | 4.424411774  | 17.197969437 |
| C | 0.431294918  | 3.711596966  | 17.083980560 |
| C | 1.648644209  | 4.426380157  | 16.895603180 |
| C | 2.894540310  | 3.694458246  | 16.777492523 |
| C | 4.161895275  | 4.437629700  | 16.811843872 |
| C | 5.396258831  | 3.701564550  | 16.911590576 |
| C | 6.621552467  | 4.429855347  | 17.104387283 |
| C | 7.838268280  | 3.714125156  | 17.205776215 |
| C | 9.062963486  | 4.425473690  | 17.274572372 |
| C | 10.290956497 | 3.713508368  | 17.300439835 |
| C | 11.519014359 | 4.424827099  | 17.302835464 |
| C | -3.243824482 | 5.845810413  | 17.315410614 |
| C | -2.016343117 | 6.556608677  | 17.298257828 |
| C | -0.790463924 | 5.848313332  | 17.219352722 |
| C | 0.426560163  | 6.568742275  | 17.154857635 |
| C | 1.657910109  | 5.861536980  | 16.977876663 |
| C | 2.915125132  | 6.572182178  | 17.008100510 |
| C | 4.148926735  | 5.862077713  | 17.019798279 |
| C | 5.367866993  | 6.559022427  | 17.162982941 |
| C | 6.605940819  | 5.844148636  | 17.182767868 |

**Pts Isomer 4**

|   |              |              |              |
|---|--------------|--------------|--------------|
| C | -6.781276703 | 12.081474304 | 17.215579987 |
| C | 1.830720901  | 0.011132547  | 17.194316864 |
| C | -4.318017006 | 12.081309319 | 17.200511932 |
| C | 4.290739059  | 0.005585489  | 17.188638687 |
| C | -1.858098030 | 12.078866959 | 17.195270538 |
| C | 6.751298904  | 0.005846047  | 17.193933487 |
| C | 0.599959850  | 12.078992844 | 17.190450668 |
| C | 9.209884644  | 0.008120729  | 17.203056335 |
| C | 3.059845924  | 12.080572128 | 17.199119568 |
| C | 11.667921066 | 0.007460530  | 17.219587326 |
| C | 5.519357681  | 12.079203606 | 17.219223022 |
| C | 14.129401207 | 0.006153528  | 17.221542358 |
| C | -0.632671833 | 1.427020431  | 17.206016541 |
| C | 0.594907165  | 2.134789944  | 17.149757385 |
| C | 1.830293655  | 1.425446391  | 17.146224976 |
| C | 3.063847303  | 2.132788420  | 17.099569321 |
| C | 4.292907715  | 1.425179243  | 17.146781921 |
| C | 5.522677898  | 2.134751081  | 17.136672974 |
| C | 6.753046513  | 1.426645398  | 17.179668427 |
| C | 7.979448318  | 2.137113094  | 17.188667297 |
| C | 9.209944725  | 1.427286386  | 17.211568832 |
| C | 10.439674377 | 2.137533426  | 17.221281052 |
| C | 11.667270660 | 1.427803755  | 17.225326538 |
| C | 12.898566246 | 2.138133049  | 17.211734772 |
| C | -1.861263871 | 3.557669401  | 17.194561005 |
| C | -0.634060502 | 4.265325069  | 17.122196198 |
| C | 0.582284451  | 3.546179295  | 17.057403564 |
| C | 1.819890261  | 4.245363712  | 16.826940536 |

|    |              |              |              |
|----|--------------|--------------|--------------|
| C  | 7.830188751  | 6.554643154  | 17.275985718 |
| C  | 9.059097290  | 5.845151424  | 17.294921875 |
| C  | 10.287950516 | 6.556639194  | 17.329402924 |
| C  | -4.473537445 | 7.975352287  | 17.349874496 |
| C  | -3.243858576 | 8.685845375  | 17.354675293 |
| C  | -2.015538931 | 7.976561546  | 17.328460693 |
| C  | -0.785531998 | 8.686832428  | 17.317565918 |
| C  | 0.441364765  | 7.981423855  | 17.247350693 |
| C  | 1.675377846  | 8.689173698  | 17.238834381 |
| C  | 2.906406879  | 7.988196373  | 17.156259537 |
| C  | 4.135914326  | 8.689519882  | 17.230264664 |
| C  | 5.365716934  | 7.976973534  | 17.240510941 |
| C  | 6.595325470  | 8.685017586  | 17.304710388 |
| C  | 7.826710224  | 7.975542545  | 17.318168640 |
| C  | 9.055029869  | 8.685799599  | 17.350061417 |
| C  | -5.705598354 | 10.105976105 | 17.349397659 |
| C  | -4.473733902 | 10.818069458 | 17.337947845 |
| C  | -3.242712498 | 10.105810165 | 17.352212906 |
| C  | -2.012758732 | 10.812530518 | 17.342147827 |
| C  | -0.782871246 | 10.105121613 | 17.338987350 |
| C  | 0.447772503  | 10.813888550 | 17.328182220 |
| C  | 1.677206039  | 10.105153084 | 17.300794601 |
| C  | 2.906872749  | 10.816720009 | 17.305685043 |
| C  | 4.136148930  | 10.108435631 | 17.293439865 |
| C  | 5.365324497  | 10.815939903 | 17.320590973 |
| C  | 6.594559669  | 10.104039192 | 17.328388214 |
| C  | 7.824812412  | 10.813952446 | 17.338617325 |
| Pt | 2.875151157  | 6.170722961  | 12.555209160 |
| Pt | 4.747449398  | 4.461009502  | 12.308677673 |
| Pt | 2.864141226  | 2.782128096  | 14.781282425 |
| Pt | 0.910045743  | 1.749081850  | 13.471874237 |
| Pt | 1.296268225  | 4.207737923  | 12.873116493 |
| Pt | 4.961338043  | 4.229501247  | 14.793245316 |
| Pt | 1.998061180  | 5.617269516  | 14.860872269 |
| Pt | 3.081106186  | 2.545411825  | 12.277345657 |

|   |              |             |              |
|---|--------------|-------------|--------------|
| C | 3.075252771  | 3.543050528 | 16.973087311 |
| C | 4.295538902  | 4.246986389 | 16.956670761 |
| C | 5.524069786  | 3.552238941 | 17.071512222 |
| C | 6.754431725  | 4.266558647 | 17.102993011 |
| C | 7.978741646  | 3.559614420 | 17.167581558 |
| C | 9.211043358  | 4.270864964 | 17.194707870 |
| C | 10.439992905 | 3.560074806 | 17.216293335 |
| C | 11.667873383 | 4.269552231 | 17.209524155 |
| C | -3.090960741 | 5.689840794 | 17.199121475 |
| C | -1.861015677 | 6.401366711 | 17.157527924 |
| C | -0.635324955 | 5.693296909 | 17.087665558 |
| C | 0.577512980  | 6.408819675 | 16.959072113 |
| C | 1.803497076  | 5.692949772 | 16.737573624 |
| C | 3.071538925  | 6.422272682 | 16.741521835 |
| C | 4.311389446  | 5.684787273 | 16.805923462 |
| C | 5.541749954  | 6.407934189 | 16.986019135 |
| C | 6.759652138  | 5.690834045 | 17.083667755 |
| C | 7.984386921  | 6.401254654 | 17.153118134 |
| C | 9.213375092  | 5.689091206 | 17.190975189 |
| C | 10.442317963 | 6.399820805 | 17.204319000 |
| C | -4.318226814 | 7.821642399 | 17.202402115 |
| C | -3.090636253 | 8.530888557 | 17.191074371 |
| C | -1.860630512 | 7.820439339 | 17.153795242 |
| C | -0.631693363 | 8.530220985 | 17.118171692 |
| C | 0.592855930  | 7.822083473 | 17.026521683 |
| C | 1.830230713  | 8.535444260 | 17.024120331 |
| C | 3.062457561  | 7.840837002 | 16.953071594 |
| C | 4.290049553  | 8.537536621 | 17.060224533 |

|   |              |              |              |
|---|--------------|--------------|--------------|
| C | 5.527405739  | 7.823918819  | 17.060916901 |
| C | 6.753554344  | 8.531722069  | 17.147466660 |
| C | 7.982244015  | 7.821502686  | 17.167785645 |
| C | 9.212244987  | 8.532397270  | 17.200597763 |
| C | -5.548522472 | 9.950510979  | 17.210811615 |
| C | -4.318865776 | 10.660576820 | 17.210813522 |
| C | -3.090194225 | 9.950958252  | 17.198982239 |
| C | -1.859048843 | 10.660409927 | 17.189838409 |
| C | -0.629724979 | 9.951514244  | 17.156629562 |
| C | 0.598709583  | 10.659956932 | 17.157196045 |
| C | 1.830393314  | 9.949947357  | 17.117265701 |
| C | 3.059685230  | 10.660122871 | 17.155107498 |

### Pt<sub>8</sub> Isomer 5

|   |              |              |              |
|---|--------------|--------------|--------------|
| C | -6.814643383 | 12.064432144 | 17.295902252 |
| C | -5.582674503 | 12.776748657 | 17.275068283 |
| C | -4.351408482 | 12.064528465 | 17.279617310 |
| C | -3.122704983 | 12.771233559 | 17.266786575 |
| C | -1.891589642 | 12.061813354 | 17.272064209 |
| C | -0.662028313 | 12.771376610 | 17.270040512 |
| C | 0.566672325  | 12.062125206 | 17.266719818 |
| C | 1.796570778  | 12.773573875 | 17.280532837 |
| C | 3.026473522  | 12.063543320 | 17.276256561 |
| C | 4.254549503  | 12.772856712 | 17.298522949 |
| C | 5.486031532  | 12.062056541 | 17.297580719 |
| C | 6.716094494  | 12.771678925 | 17.302978516 |
| C | -0.666215479 | 1.410022020  | 17.289354324 |
| C | 0.561470628  | 2.117655754  | 17.233627319 |
| C | 1.797043920  | 1.408465505  | 17.228607178 |
| C | 3.030661583  | 2.115758657  | 17.179738998 |
| C | 4.259512424  | 1.408176422  | 17.224338531 |
| C | 5.489188194  | 2.117874384  | 17.211879730 |
| C | 6.719612598  | 1.409662962  | 17.255062103 |
| C | 7.946111202  | 2.119918823  | 17.264148712 |
| C | 9.176642418  | 1.409987450  | 17.288959503 |
| C | 10.406383514 | 2.120323896  | 17.300327301 |
| C | 11.633886337 | 1.410695195  | 17.306116104 |
| C | 12.865077019 | 2.121270657  | 17.293979645 |
| C | -1.894608736 | 3.540822744  | 17.276683807 |
| C | -0.667427659 | 4.248476028  | 17.203613281 |
| C | 0.548657894  | 3.529058456  | 17.140220642 |
| C | 1.786189556  | 4.227676868  | 16.906284332 |
| C | 3.041935444  | 3.525904417  | 17.051420212 |
| C | 4.262069702  | 4.229848385  | 17.029020309 |
| C | 5.490818024  | 3.535262346  | 17.144084930 |
| C | 6.721313477  | 4.249665737  | 17.174757004 |
| C | 7.945351601  | 3.542424202  | 17.241577148 |
| C | 9.177652359  | 4.253521919  | 17.270046234 |
| C | 10.406618118 | 3.542862654  | 17.294904709 |
| C | 11.634417534 | 4.252564430  | 17.289831161 |
| C | -3.124504089 | 5.672914028  | 17.277910233 |
| C | -1.894528151 | 6.384510517  | 17.235427856 |
| C | -0.668764114 | 5.676531315  | 17.165672302 |
| C | 0.543759823  | 6.391609669  | 17.033161163 |

### Pt<sub>8</sub> Isomer 6

|   |              |              |              |
|---|--------------|--------------|--------------|
| C | -6.799846649 | 12.178588867 | 17.202823639 |
| C | 1.809884310  | 0.103811696  | 17.224708557 |
| C | -4.339429379 | 12.176934242 | 17.262151718 |
| C | 4.269656181  | 0.103703350  | 17.303056717 |
| C | -1.881503582 | 12.177945137 | 17.360570908 |
| C | 6.727828026  | 0.106282435  | 17.379627228 |
| C | 0.577910423  | 12.179816246 | 17.404396057 |
| C | 9.189462662  | 0.108739048  | 17.365852356 |
| C | 3.041455269  | 12.180624962 | 17.338068008 |

|    |              |              |              |
|----|--------------|--------------|--------------|
| C  | 4.289677620  | 9.952009201  | 17.146604538 |
| C  | 5.520960808  | 10.661879539 | 17.192441940 |
| C  | 6.751555443  | 9.953027725  | 17.190654755 |
| C  | 7.979824066  | 10.661814690 | 17.213340759 |
| Pt | 1.835763931  | 7.434152126  | 10.860518456 |
| Pt | 3.789861679  | 6.048686028  | 12.096241951 |
| Pt | 1.735722542  | 4.819467545  | 14.700651169 |
| Pt | -0.179754734 | 3.696912766  | 13.422571182 |
| Pt | 0.240432978  | 5.754363537  | 11.915842056 |
| Pt | 3.938211203  | 6.129522800  | 14.672469139 |
| Pt | 1.806115627  | 7.126670361  | 13.389615059 |
| Pt | 2.134125710  | 4.137467384  | 12.310171127 |

|    |              |              |              |
|----|--------------|--------------|--------------|
| C  | 1.769346476  | 5.675055504  | 16.810501099 |
| C  | 3.037603140  | 6.404811859  | 16.809917450 |
| C  | 4.277689934  | 5.667608738  | 16.874042511 |
| C  | 5.508337021  | 6.390923023  | 17.053607941 |
| C  | 6.726303101  | 5.674037933  | 17.153430939 |
| C  | 7.950985909  | 6.384152412  | 17.225269318 |
| C  | 9.179828644  | 5.671772003  | 17.265771866 |
| C  | 10.408699036 | 6.382803917  | 17.281356812 |
| C  | -4.351821423 | 7.804725170  | 17.279342651 |
| C  | -3.124131441 | 8.513924599  | 17.268329620 |
| C  | -1.894057512 | 7.803548813  | 17.230533600 |
| C  | -0.664920807 | 8.513265610  | 17.193508148 |
| C  | 0.559379578  | 7.804996967  | 17.099458694 |
| C  | 1.796706200  | 8.518271446  | 17.095142365 |
| C  | 3.028929710  | 7.823617935  | 17.021404266 |
| C  | 4.256542683  | 8.520390511  | 17.129447937 |
| C  | 5.494104862  | 7.806792259  | 17.129613876 |
| C  | 6.720227718  | 8.514662743  | 17.218965530 |
| C  | 7.948845863  | 7.804387569  | 17.240446091 |
| C  | 9.178649902  | 8.515460968  | 17.276361465 |
| C  | -5.582008362 | 9.933530807  | 17.287923813 |
| C  | -4.352228165 | 10.643738747 | 17.288864136 |
| C  | -3.123719692 | 9.933982849  | 17.276624680 |
| C  | -1.892568111 | 10.643376350 | 17.266494751 |
| C  | -0.663174152 | 9.934558868  | 17.232275009 |
| C  | 0.565279961  | 10.643019676 | 17.232311249 |
| C  | 1.796996117  | 9.932841301  | 17.190401077 |
| C  | 3.026448250  | 10.643205643 | 17.229101181 |
| C  | 4.256427765  | 9.934949875  | 17.218721390 |
| C  | 5.487689018  | 10.644751549 | 17.267047882 |
| C  | 6.718202114  | 9.935905457  | 17.265155792 |
| C  | 7.946335316  | 10.644760132 | 17.290819168 |
| Pt | 1.788117409  | 7.348944664  | 10.909371376 |
| Pt | 3.746447802  | 5.986216068  | 12.163156509 |
| Pt | 1.699734688  | 4.790134907  | 14.779964447 |
| Pt | -0.213665843 | 3.640933514  | 13.523131371 |
| Pt | 0.199009180  | 5.682792664  | 11.993990898 |
| Pt | 3.898099899  | 6.104002476  | 14.739346504 |
| Pt | 1.765292168  | 7.083996773  | 13.443239212 |
| Pt | 2.095966101  | 4.073813438  | 12.398979187 |

|   |              |              |              |
|---|--------------|--------------|--------------|
| C | 11.650244713 | 0.108644024  | 17.275667191 |
| C | 5.499930382  | 12.184174538 | 17.228013992 |
| C | 14.110438347 | 0.107933909  | 17.212591171 |
| C | -0.652228475 | 1.525677681  | 17.215402603 |
| C | 0.578364372  | 2.233695269  | 17.201330185 |
| C | 1.809622526  | 1.523300052  | 17.216770172 |
| C | 3.040339470  | 2.230257988  | 17.231475830 |
| C | 4.270174980  | 1.522923946  | 17.278350830 |
| C | 5.499444962  | 2.234120607  | 17.291351318 |

|   |              |             |              |
|---|--------------|-------------|--------------|
| C | 6.729131699  | 1.525579691 | 17.333023071 |
| C | 7.958418846  | 2.236795664 | 17.315217972 |
| C | 9.189032555  | 1.528085470 | 17.326772690 |
| C | 10.418681145 | 2.237766504 | 17.284227371 |
| C | 11.648729324 | 1.528092623 | 17.265432358 |
| C | 12.877931595 | 2.236026049 | 17.230131149 |
| C | -1.883074641 | 3.656594992 | 17.216053009 |
| C | -0.656323433 | 4.364919662 | 17.180820465 |
| C | 0.576039791  | 3.649281502 | 17.175041199 |
| C | 1.808074236  | 4.346548080 | 17.145593643 |
| C | 3.040595770  | 3.649181843 | 17.200307846 |
| C | 4.271316051  | 4.360928535 | 17.223445892 |
| C | 5.499905586  | 3.654128790 | 17.257417679 |
| C | 6.730720520  | 4.365768433 | 17.251861572 |
| C | 7.958772182  | 3.656469345 | 17.272779465 |
| C | 9.189065933  | 4.366883755 | 17.249881744 |
| C | 10.418271065 | 3.656805038 | 17.253803253 |
| C | 11.647184372 | 4.366840839 | 17.226955414 |
| C | -3.112743139 | 5.786188126 | 17.227552414 |
| C | -1.884897113 | 6.496655941 | 17.228437424 |
| C | -0.665117979 | 5.781681061 | 17.160623550 |
| C | 0.567611217  | 6.509328365 | 17.090436935 |
| C | 1.813287258  | 5.774535656 | 17.092342377 |
| C | 3.052991629  | 6.481736183 | 17.168285370 |
| C | 4.276062489  | 5.781186581 | 17.200731277 |
| C | 5.509290695  | 6.497234344 | 17.180250168 |
| C | 6.733877182  | 5.786556721 | 17.210765839 |
| C | 7.963371277  | 6.497478485 | 17.197105408 |
| C | 9.190663338  | 5.786401749 | 17.221258163 |
| C | 10.419558525 | 6.497458935 | 17.226848602 |
| C | -4.337763786 | 7.917134762 | 17.234165192 |

**Pt<sub>8</sub> Isomer 7**

|   |              |              |              |
|---|--------------|--------------|--------------|
| C | -6.847603798 | 12.115255356 | 17.201320648 |
| C | 1.761874795  | 0.043699522  | 17.232423782 |
| C | -4.389195442 | 12.115477562 | 17.262832642 |
| C | 4.220698357  | 0.042196523  | 17.280799866 |
| C | -1.930189610 | 12.114995003 | 17.286195755 |
| C | 6.682005405  | 0.040532570  | 17.270341873 |
| C | 0.529645443  | 12.113418579 | 17.245595932 |
| C | 9.140786171  | 0.045771729  | 17.206241608 |
| C | 2.989341259  | 12.130323410 | 17.148424149 |
| C | 11.599710464 | 0.047695000  | 17.149055481 |
| C | 5.455086708  | 12.116271973 | 17.144420624 |
| C | 14.063016891 | 0.043792423  | 17.169269562 |
| C | -0.698397160 | 1.464345098  | 17.170026779 |
| C | 0.531801820  | 2.174855709  | 17.197557449 |
| C | 1.762651563  | 1.462481022  | 17.233873367 |
| C | 2.992926598  | 2.170362949  | 17.272323608 |
| C | 4.222080231  | 1.461099505  | 17.285449982 |
| C | 5.452986240  | 2.170551062  | 17.293111801 |
| C | 6.682311535  | 1.461544156  | 17.274427414 |
| C | 7.910979748  | 2.173070669  | 17.257268906 |
| C | 9.140924454  | 1.465009093  | 17.219964981 |
| C | 10.370041847 | 2.173991919  | 17.194591522 |
| C | 11.600211143 | 1.464512229  | 17.167371750 |
| C | 12.831214905 | 2.173122644  | 17.164445877 |
| C | -1.930746555 | 3.591681719  | 17.168258667 |
| C | -0.700366974 | 4.299107552  | 17.162040710 |
| C | 0.532134056  | 3.591860056  | 17.195739746 |
| C | 1.766661167  | 4.300178051  | 17.251018524 |
| C | 2.995291471  | 3.589294672  | 17.287895203 |
| C | 4.223372459  | 4.299267292  | 17.316511154 |
| C | 5.453704357  | 3.590116024  | 17.307737350 |
| C | 6.682235718  | 4.300595760  | 17.302091599 |

|    |              |              |              |
|----|--------------|--------------|--------------|
| C  | -3.107428312 | 8.626772881  | 17.284683228 |
| C  | -1.881699800 | 7.917923450  | 17.292364120 |
| C  | -0.654092312 | 8.632588387  | 17.363950729 |
| C  | 0.574349880  | 7.936787128  | 17.310541153 |
| C  | 1.793601513  | 8.641831398  | 17.347555161 |
| C  | 3.029311180  | 7.926259995  | 17.121475220 |
| C  | 4.279404163  | 8.641903877  | 17.068246841 |
| C  | 5.515872002  | 7.913755894  | 17.113162994 |
| C  | 6.737483501  | 8.628462791  | 17.139551163 |
| C  | 7.965785027  | 7.916823387  | 17.173656464 |
| C  | 9.194086075  | 8.627578735  | 17.202381134 |
| C  | -5.567867756 | 10.047798157 | 17.208229065 |
| C  | -4.338417530 | 10.756860733 | 17.260978699 |
| C  | -3.108393431 | 10.048422813 | 17.312128067 |
| C  | -1.882092476 | 10.758953094 | 17.372879028 |
| C  | -0.651334286 | 10.050604820 | 17.417074203 |
| C  | 0.577989101  | 10.758903503 | 17.445045471 |
| C  | 1.807587147  | 10.052021980 | 17.413032532 |
| C  | 3.041662693  | 10.764579773 | 17.333551407 |
| C  | 4.269661903  | 10.069495201 | 17.195255280 |
| C  | 5.500703812  | 10.765616417 | 17.187065125 |
| C  | 6.731833458  | 10.050332069 | 17.155820847 |
| C  | 7.960660458  | 10.757868767 | 17.183956146 |
| Pt | 3.441875935  | 8.163842201  | 15.002323151 |
| Pt | 1.845924854  | 9.783771515  | 13.785549164 |
| Pt | -0.690424442 | 10.511730194 | 13.852538109 |
| Pt | 1.343605995  | 6.450703621  | 15.000267982 |
| Pt | -0.147957325 | 7.900624275  | 13.522087097 |
| Pt | 2.259047985  | 7.470337868  | 12.803829193 |
| Pt | -2.422247410 | 8.779408455  | 13.778064728 |
| Pt | 1.137407780  | 12.069694519 | 14.311385155 |

|   |              |              |              |
|---|--------------|--------------|--------------|
| C | 7.911478996  | 3.591985226  | 17.271114349 |
| C | 9.140673637  | 4.302967548  | 17.249486923 |
| C | 10.369862556 | 3.593880177  | 17.209817886 |
| C | 11.599126816 | 4.303395271  | 17.191556931 |
| C | -3.162953138 | 5.723097801  | 17.215984344 |
| C | -1.934935212 | 6.433243275  | 17.204496384 |
| C | -0.709696531 | 5.717408180  | 17.153829575 |
| C | 0.538773537  | 6.426895618  | 17.129899979 |
| C | 1.777696371  | 5.711918354  | 17.254144669 |
| C | 2.995515108  | 6.427254677  | 17.330905914 |
| C | 4.224433899  | 5.718645573  | 17.335674286 |
| C | 5.453948975  | 6.428678513  | 17.325540543 |
| C | 6.682699203  | 5.720641136  | 17.308383942 |
| C | 7.910270214  | 6.432765961  | 17.283748627 |
| C | 9.139926910  | 5.723274231  | 17.262685776 |
| C | 10.368090630 | 6.433738232  | 17.249349594 |
| C | -4.392867565 | 7.854074955  | 17.262863159 |
| C | -3.163197041 | 8.565134048  | 17.272184372 |
| C | -1.937259912 | 7.857007980  | 17.253999710 |
| C | -0.711822510 | 8.571599960  | 17.260765076 |
| C | 0.529806137  | 7.865149975  | 17.215545654 |
| C | 1.767532349  | 8.570119858  | 17.303060532 |
| C | 2.994983673  | 7.849830151  | 17.325952530 |
| C | 4.222787857  | 8.547004700  | 17.260389328 |
| C | 5.454068184  | 7.847617149  | 17.287055969 |
| C | 6.681553841  | 8.562123299  | 17.248952866 |
| C | 7.909025669  | 7.853475094  | 17.266029358 |
| C | 9.139820099  | 8.564377785  | 17.259292603 |
| C | -5.618555546 | 9.984768867  | 17.249553680 |
| C | -4.390232086 | 10.695399284 | 17.265703201 |
| C | -3.162208557 | 9.985837936  | 17.281909943 |
| C | -1.934006214 | 10.696613312 | 17.291492462 |

|   |              |              |              |    |             |              |              |
|---|--------------|--------------|--------------|----|-------------|--------------|--------------|
| C | -0.705935955 | 9.987416267  | 17.290576935 | Pt | 0.649079084 | 6.821573734  | 10.058347702 |
| C | 0.525758743  | 10.693816185 | 17.268207550 | Pt | 2.252862453 | 8.317278862  | 11.146791458 |
| C | 1.749848843  | 9.980034828  | 17.247795105 | Pt | 3.510009766 | 10.174318314 | 12.427226067 |
| C | 2.982412815  | 10.697972298 | 17.091156006 | Pt | 0.433968544 | 7.146425724  | 15.007486343 |
| C | 4.229328632  | 9.972741127  | 17.101806641 | Pt | 2.066665649 | 8.558196068  | 13.777526855 |
| C | 5.464987755  | 10.698758125 | 17.145196915 | Pt | 0.787307262 | 6.704942226  | 12.555366516 |
| C | 6.685358047  | 9.984679222  | 17.202093124 | Pt | 3.548334599 | 10.165323257 | 14.955556870 |
| C | 7.913602829  | 10.695931435 | 17.217391968 | Pt | 4.010565281 | 9.606053352  | 10.034266472 |

### Pt<sub>8</sub> Isomer 8

|   |              |              |              |    |              |              |              |
|---|--------------|--------------|--------------|----|--------------|--------------|--------------|
| C | -6.927095413 | 12.160392761 | 17.140819550 | C  | 1.680263042  | 5.763473511  | 17.152336121 |
| C | 1.680910110  | 0.087186359  | 17.182445526 | C  | 2.916898251  | 6.472609520  | 17.204242706 |
| C | -4.468397141 | 12.160264015 | 17.192775726 | C  | 4.142794609  | 5.765860558  | 17.288396835 |
| C | 4.138669968  | 0.088970795  | 17.247842789 | C  | 5.374535084  | 6.475272655  | 17.310760498 |
| C | -2.011147976 | 12.162961960 | 17.248809814 | C  | 6.604915142  | 5.765703201  | 17.326932907 |
| C | 6.596889496  | 0.090243958  | 17.308338165 | C  | 7.833710670  | 6.476036072  | 17.288364410 |
| C | 0.446396828  | 12.162892342 | 17.297494888 | C  | 9.063224792  | 5.766264439  | 17.275461197 |
| C | 9.059421539  | 0.090356007  | 17.345411301 | C  | 10.291696548 | 6.476349831  | 17.201551437 |
| C | 2.911346912  | 12.167117119 | 17.310855865 | C  | -4.469916821 | 7.896277905  | 17.160791397 |
| C | 11.525759697 | 0.092858128  | 17.266355515 | C  | -3.244045734 | 8.608499527  | 17.102802277 |
| C | 5.372681141  | 12.173227310 | 17.144699097 | C  | -2.020740032 | 7.893410683  | 17.029508591 |
| C | 13.983820915 | 0.091819264  | 17.159336090 | C  | -0.792638779 | 8.619540215  | 16.933938980 |
| C | -0.776796937 | 1.510287046  | 17.205986023 | C  | 0.451114178  | 7.884686470  | 16.833217621 |
| C | 0.452742815  | 2.217717648  | 17.209705353 | C  | 1.713386059  | 8.613333702  | 16.943264008 |
| C | 1.681571960  | 1.507331371  | 17.216312408 | C  | 2.930547714  | 7.884731293  | 17.162391663 |
| C | 2.910595894  | 2.217894554  | 17.262380600 | C  | 4.151170254  | 8.589555740  | 17.211154938 |
| C | 4.140018463  | 1.508427739  | 17.288219452 | C  | 5.378949642  | 7.891666889  | 17.269683838 |
| C | 5.369314194  | 2.217867613  | 17.334997177 | C  | 6.609526157  | 8.604973793  | 17.215024948 |
| C | 6.599586964  | 1.508753181  | 17.349765778 | C  | 7.834122658  | 7.896939754  | 17.233366013 |
| C | 7.830461502  | 2.217617273  | 17.366600037 | C  | 9.062950134  | 8.607753754  | 17.179248810 |
| C | 9.060986519  | 1.507601976  | 17.363126755 | C  | -5.695438862 | 10.026481628 | 17.150981903 |
| C | 10.293272972 | 2.218277454  | 17.336475372 | C  | -4.466907978 | 10.739210129 | 17.159040451 |
| C | 11.523938179 | 1.509589672  | 17.293489456 | C  | -3.240758181 | 10.030254364 | 17.136228561 |
| C | 12.753457069 | 2.219737053  | 17.243797302 | C  | -2.012531281 | 10.745421410 | 17.167140961 |
| C | -2.008026361 | 3.637705564  | 17.226142883 | C  | -0.784807682 | 10.045929909 | 17.098522186 |
| C | -0.777226210 | 4.346197605  | 17.183097839 | C  | 0.436588287  | 10.752986908 | 17.179815292 |
| C | 0.452390671  | 3.637171268  | 17.201789856 | C  | 1.680258751  | 10.047085762 | 17.102750778 |
| C | 1.681759596  | 4.346468449  | 17.212932587 | C  | 2.906584740  | 10.760140419 | 17.222959518 |
| C | 2.911846876  | 3.637061119  | 17.268640518 | C  | 4.138585091  | 10.026831627 | 17.076610565 |
| C | 4.141929626  | 4.345728874  | 17.306421280 | C  | 5.383755207  | 10.745825768 | 17.049198151 |
| C | 5.370924950  | 3.637226105  | 17.342330933 | C  | 6.614447594  | 10.021818161 | 17.115142822 |
| C | 6.602766037  | 4.346663952  | 17.350093842 | C  | 7.836713314  | 10.737588882 | 17.128215790 |
| C | 7.832554817  | 3.637520552  | 17.355497360 | Pt | 4.000832081  | 10.915475845 | 10.512435913 |
| C | 9.062351227  | 4.347326279  | 17.319835663 | Pt | 3.347388268  | 9.988699913  | 12.687679291 |
| C | 10.293417931 | 3.637254953  | 17.306430817 | Pt | 2.050094604  | 9.477734566  | 14.845972061 |
| C | 11.521993637 | 4.346756935  | 17.240108490 | Pt | 0.693697453  | 7.272125244  | 10.564862251 |
| C | -3.238160849 | 5.766695976  | 17.175884247 | Pt | 1.227554321  | 8.397830009  | 12.676061630 |
| C | -2.011878014 | 6.473654270  | 17.085903168 | Pt | 2.385289669  | 9.053764343  | 10.375522614 |
| C | -0.775561333 | 5.762277126  | 17.104665756 | Pt | -0.177758217 | 8.270997047  | 14.769086838 |
| C | 0.454242468  | 6.458557129  | 17.039928436 | Pt | 4.473077774  | 10.264040947 | 14.922187805 |

### References

1. H. Tsunoyama, A. Ohnuma, K. Takahashi, A. Velloth, M. Ehara, N. Ichikuni, M. Tabuchi, and A. Nakajima, *Chem. Commun.*, 2019, **55**, 12603-12606.
2. J. C. Fuggle and N. Mårtensson, *J. Electron Spectrosc. Relat. Phenom.*, 1980, **21**, 275-281.
3. C. D. Wagner, *Practical Surface Analysis*. Ed. by D. Briggs, M. P. Seah, Vol. 1, 595, John Wiley, 1990.
4. B. Ravel and M. Newville, *J. Synchrotron Radiat.*, 2005, **12**, 537-541.
5. J. K. Nørskov, J. Rossmeisl, A. Logadottir, L. Lindqvist, J. R. Kitchin, T. Bligaard and H. Jónsson, *J. Phys. Chem. B*, 2004, **108**, 17886-17892.
